# Supplementary material
Source: PubMed Central journal article supplement (PMC7700759)
Supplement: NIHMS1591819-supplement-Supplementary_file.pdf [file NIHMS1591819-supplement-Supplementary_file.pdf]

## Supplementary Information

### **Proteomic analysis of MYB-regulated secretome identifies functional pathways and biomarkers: potential pathobiological and clinical implications**

Haseeb Zubair<sup>1,2,^</sup>, Girijesh Kumar Patel<sup>2,^</sup>, Mohammad Aslam Khan<sup>1,2</sup>, Shafquat Azim<sup>2</sup>, Asif Zubair<sup>3</sup>, Seema Singh<sup>1,2,4</sup>, Sanjeev Kumar Srivastava<sup>1,2</sup>, Ajay Pratap Singh<sup>1,2,4,\*</sup>

<sup>1</sup>*Department of Pathology, College of Medicine, University of South Alabama, Mobile, AL 36617;* <sup>2</sup>*Mitchell Cancer Institute, University of South Alabama, Mobile, AL 36604;* <sup>3</sup>*Molecular and Computational Biology, School of Biological Sciences, Dornsife College of Letters, Arts and Sciences, University of Southern California, Los Angeles, CA 90089, USA,* <sup>4</sup>*Department of Biochemistry and Molecular Biology, College of Medicine, University of South Alabama, Mobile, AL 36688*

**Running title:** MYB-regulated pancreatic cancer secretome

**\*Correspondence to:**

Ajay Pratap Singh, PhD  
Professor and Director of Research  
Department of Pathology, College of Medicine  
Program Leader, Cancer Biology  
Mitchell Cancer Institute, University of South Alabama  
1660 Springhill Avenue, Mobile, AL 36604  
Tel: +1 251-445-9843, Fax: +1 251-460-6994  
Email: [asingh@health.southalabama.edu](mailto:asingh@health.southalabama.edu)



|       |               |           |                      |    |   |    |   |   |      |       |       |           |           |           |           |           |           |           |           |          |          |          |          |          |       |   |       |       |     |     |   |
|-------|---------------|-----------|----------------------|----|---|----|---|---|------|-------|-------|-----------|-----------|-----------|-----------|-----------|-----------|-----------|-----------|----------|----------|----------|----------|----------|-------|---|-------|-------|-----|-----|---|
| FALSE | Master Prc204 | 4504249   | histone H2           | 27 | 3 | 56 | 3 | 1 | 130  | 14.1  | 10.9  | High      | 1.45E+08  | 1.58E+08 | 1.32E+08 | 1.59E+08 | 1.61E+08 | 1.57E+08 | 83.91 | 3 | 468   | 3     |     |     |   |
| FALSE | Master Prc204 | 18105045  | histone H2           | 27 | 3 | 56 | 3 | 1 | 128  | 13.9  | 10.89 | High      | 1.45E+08  | 1.58E+08 | 1.32E+08 | 1.59E+08 | 1.61E+08 | 1.57E+08 | 83.91 | 3 | 468   | 3     |     |     |   |
| FALSE | Master Prc204 | 10675567  | histone H2           | 27 | 3 | 56 | 3 | 1 | 130  | 14.1  | 10.9  | High      | 1.45E+08  | 1.58E+08 | 1.32E+08 | 1.59E+08 | 1.61E+08 | 1.57E+08 | 83.91 | 3 | 468   | 3     |     |     |   |
| FALSE | None          | 15,195    | 153791352POTE anky   | 4  | 8 | 72 | 0 | 2 | 1075 | 121.4 | 6.2   | Not Found |           |          |          |          |          |          |       |   | 82.14 | 8     | 565 | 8   |   |
| FALSE | None          | 15,195    | 13413322POTE anky    | 4  | 8 | 72 | 0 | 2 | 1075 | 121.3 | 6.2   | Not Found |           |          |          |          |          |          |       |   |       | 82.14 | 8   | 565 | 8 |
| FALSE | None          | 15,195    | 578804361PREDICTED   | 7  | 8 | 72 | 0 | 2 | 675  | 76.6  | 5.16  | Not Found |           |          |          |          |          |          |       |   |       | 82.14 | 8   | 565 | 8 |
| FALSE | Master Prc196 | 296080693 | glucose-6-ph         | 11 | 4 | 52 | 4 | 1 | 569  | 64.3  | 8.91  | High      | 4909534   | 4765156  | 5631891  | 42187861 | 38510199 | 38666642 | 81.34 | 4 | 957   | 4     |     |     |   |
| FALSE | Master Prc196 | 530416227 | PREDICTED            | 10 | 4 | 52 | 4 | 1 | 597  | 67.2  | 8.97  | High      | 4909534   | 4765156  | 5631891  | 42187861 | 38510199 | 38666642 | 81.34 | 4 | 957   | 4     |     |     |   |
| FALSE | Master Prc196 | 530416225 | PREDICTED            | 11 | 4 | 52 | 4 | 1 | 558  | 63.1  | 8.32  | High      | 4909534   | 4765156  | 5631891  | 42187861 | 38510199 | 38666642 | 81.34 | 4 | 957   | 4     |     |     |   |
| FALSE | None          | 204       | 28195394 histone H2  | 22 | 2 | 51 | 2 | 1 | 130  | 14    | 10.89 | High      | 1.45E+08  | 1.58E+08 | 1.59E+08 | 1.59E+08 | 1.61E+08 | 1.57E+08 | 80.06 | 2 | 467   | 2     |     |     |   |
| FALSE | None          | 127       | 578812963PREDICTED   | 11 | 5 | 61 | 5 | 1 | 543  | 64    | 6.01  | High      | 24536958  | 31235044 | 26308772 | 63280634 | 61985340 | 63749418 | 79.26 | 5 | 771   | 5     |     |     |   |
| FALSE | None          | 101       | 538919685malate def  | 11 | 2 | 38 | 2 | 1 | 296  | 30.9  | 8.43  | High      | 7050525   | 6503875  | 6370116  | 41708198 | 27472507 | 30930153 | 78.83 | 2 | 965   | 2     |     |     |   |
| FALSE | None          | 154       | 27436948 lamin isofo | 16 | 8 | 56 | 8 | 1 | 634  | 70.6  | 8.4   | High      | 13306653  | 16559642 | 12470931 | 49349474 | 49088267 | 49986737 | 78.6  | 8 | 422   | 8     |     |     |   |
| FALSE | Master Prc218 | 39725934  | pigment ep           | 19 | 6 | 52 | 6 | 1 | 418  | 46.3  | 6.38  | High      | 7050525   | 6503875  | 6370116  | 41708198 | 27472507 | 30930153 | 76.07 | 6 | 358   | 6     |     |     |   |
| FALSE | Master Prc110 | 4557888   | keratin, tyf         | 21 | 7 | 53 | 7 | 1 | 430  | 48    | 5.45  | High      | 133165923 | 65607183 | 64877392 | 40052156 | 38826241 | 36983685 | 75.72 | 7 | 551   | 7     |     |     |   |
| FALSE | None          | 150       | 38379215Clamin isofo | 18 | 8 | 56 | 8 | 1 | 574  | 63.9  | 6.74  | High      | 7734747   | 13336050 | 9310165  | 49349474 | 49088267 | 49986737 | 75.11 | 8 | 472   | 8     |     |     |   |
| FALSE | Master Prc13  | 15379259C | heat shock           | 11 | 7 | 46 | 3 | 1 | 854  | 98.1  | 5.16  | High      | Not Found | Not Found | High      | High      | High      | High      | 7246692   |          |          | 33125428 | 34822802 | 26395731 | 70.94 | 7 | 645   | 7     |     |     |   |
| FALSE | Master Prc13  | 15414619I | heat shock           | 12 | 7 | 46 | 3 | 1 | 732  | 84.6  | 5.02  | High      | Not Found | Not Found | High      | High      | High      | High      | 7246692   |          |          | 33125428 | 34822802 | 26395731 | 70.94 | 7 | 645   | 7     |     |     |   |
| FALSE | Master Prc198 | 55956788  | nucleolin [I         | 10 | 6 | 57 | 6 | 1 | 710  | 76.6  | 4.7   | High      | 34738929  | 43918631 | 35402166 | 39469001 | 71815933 | 55517058 | 70.78 | 6 | 483   | 6     |     |     |   |
| FALSE | Master Prc162 | 117189975 | heterogen [J         | 16 | 4 | 50 | 2 | 1 | 306  | 33.7  | 5.08  | High      | 17885757  | 12888207 | 13111218 | 44324773 | 43174846 | 41306784 | 68.79 | 4 | 460   | 4     |     |     |   |
| FALSE | Master Prc162 | 117190174 | heterogen [I         | 16 | 4 | 50 | 2 | 1 | 293  | 32.3  | 5.08  | High      | 17885757  | 12888207 | 13111218 | 44324773 | 43174846 | 41306784 | 68.79 | 4 | 460   | 4     |     |     |   |
| FALSE | Master Prc162 | 57882575C | PREDICTED            | 16 | 4 | 50 | 2 | 1 | 301  | 33.3  | 5.53  | High      | 17885757  | 12888207 | 13111218 | 44324773 | 43174846 | 41306784 | 68.79 | 4 | 460   | 4     |     |     |   |
| FALSE | None          | 154       | 544063464lamin isofo | 17 | 7 | 52 | 7 | 1 | 491  | 55.7  | 7.02  | High      | 8408092   | 13336050 | 10322035 | 49349474 | 49088267 | 49986737 | 67.33 | 7 | 352   | 7     |     |     |   |
| FALSE | Master Prc137 | 4503471   | elongation           | 9  | 4 | 61 | 4 | 1 | 462  | 50.1  | 9.01  | High      | 82897985  | 1.19E+08 | 1.15E+08 | 2.67E+08 | 2.62E+08 | 2.84E+08 | 66.85 | 4 | 409   | 4     |     |     |   |
| FALSE | Master Prc271 | 18322767E | protein DJ           | 10 | 1 | 31 | 1 | 1 | 189  | 19.9  | 6.79  | High      | 2871828   | 2860633  | 2378801  | 8338607  | 7762414  | 6503442  | 66.12 | 1 | 925   | 1     |     |     |   |
| FALSE | Master Prc240 | 29788785  | tubulin bet          | 22 | 7 | 51 | 3 | 1 | 444  | 49.6  | 4.89  | High      | High      | High      | High      | High      | Not Found | Not Found | 6607369   | 7112406  | 5443881  | 17527291 |          |          | 65.98 | 7 | 380   | 7     |     |     |   |
| FALSE | Master Prc126 | 14389309  | tubulin alp          | 9  | 3 | 39 | 3 | 1 | 449  | 49.9  | 5.1   | High      | 16015814  | 20891640 | 23802201 | 48925102 | 58437752 | 46724143 | 64.8  | 3 | 387   | 3     |     |     |   |
| FALSE | Master Prc126 | 39371509E | tubulin alp          | 10 | 3 | 39 | 3 | 1 | 416  | 46.3  | 5.08  | High      | 16015814  | 20891640 | 23802201 | 48925102 | 58437752 | 46724143 | 64.8  | 3 | 387   | 3     |     |     |   |
| FALSE | Master Prc126 | 57013276  | tubulin alp          | 9  | 3 | 39 | 3 | 1 | 451  | 50.1  | 5.06  | High      | 16015814  | 20891640 | 23802201 | 48925102 | 58437752 | 46724143 | 64.8  | 3 | 387   | 3     |     |     |   |
| FALSE | Master Prc126 | 39371509I | tubulin alp          | 9  | 3 | 39 | 3 | 1 | 451  | 50.1  | 5.06  | High      | 16015814  | 20891640 | 23802201 | 48925102 | 58437752 | 46724143 | 64.8  | 3 | 387   | 3     |     |     |   |
| FALSE | None          | 15,195    | 315570273actin, gami | 14 | 7 | 53 | 0 | 2 | 333  | 37.1  | 5.54  | Not Found |           |          |          |          |          |          |       |   |       | 64.46 | 7   | 563 | 7 |
| FALSE | None          | 129       | 13676857 heat shock  | 8  | 5 | 50 | 2 | 1 | 639  | 70    | 5.74  | High      | 5783174   | 14623984 | 11365270 | 33034300 | 33314035 | 32675629 | 64.28 | 5 | 478   | 5     |     |     |   |
| FALSE | Master Prc40  | 17076350C | protein SE           | 12 | 3 | 41 | 3 | 1 | 290  | 33.5  | 4.32  | High      | 42798544  | 20466914 | 49108967 | 64696040 | 26682403 | 68161954 | 63.81 | 3 | 435   | 3     |     |     |   |
| FALSE | Master Prc40  | 17076349E | protein SE           | 13 | 3 | 41 | 3 | 1 | 277  | 32.1  | 4.22  | High      | 42798544  | 20466914 | 49108967 | 64696040 | 26682403 | 68161954 | 63.81 | 3 | 435   | 3     |     |     |   |
| FALSE | Master Prc40  | 351721324 | protein SE           | 13 | 3 | 41 | 3 | 1 | 266  | 31.1  | 4.23  | High      | 42798544  | 20466914 | 49108967 | 64696040 | 26682403 | 68161954 | 63.81 | 3 | 435   | 3     |     |     |   |
| FALSE | Master Prc40  | 35172129E | protein SE           | 13 | 3 | 41 | 3 | 1 | 268  | 31.3  | 4.21  | High      | 42798544  | 20466914 | 49108967 | 64696040 | 26682403 | 68161954 | 63.81 | 3 | 435   | 3     |     |     |   |
| FALSE | Master Prc259 | 41406057  | amyloid be           | 10 | 5 | 46 | 5 | 1 | 695  | 78.6  | 4.82  | High      | 27428946  | 34333353 | 27561803 | 1.05E+08 | 1.01E+08 | 99421577 | 63.49 | 5 | 571   | 5     |     |     |   |
| FALSE | Master Prc259 | 209862833 | amyloid be           | 10 | 5 | 46 | 5 | 1 | 746  | 84.5  | 4.75  | High      | 27428946  | 34333353 | 27561803 | 1.05E+08 | 1.01E+08 | 99421577 | 63.49 | 5 | 571   | 5     |     |     |   |
| FALSE | Master Prc259 | 20991557C | amyloid be           | 11 | 5 | 46 | 5 | 1 | 639  | 72.5  | 4.82  | High      | 27428946  | 34333353 | 27561803 | 1.05E+08 | 1.01E+08 | 99421577 | 63.49 | 5 | 571   | 5     |     |     |   |
| FALSE | Master Prc259 | 32402173E | amyloid be           | 10 | 5 | 46 | 5 | 1 | 733  | 82.9  | 4.78  | High      | 27428946  | 34333353 | 27561803 | 1.05E+08 | 1.01E+08 | 99421577 | 63.49 | 5 | 571   | 5     |     |     |   |
| FALSE | Master Prc259 | 32402174C | amyloid be           | 10 | 5 | 46 | 5 | 1 | 677  | 76.7  | 4.81  | High      | 27428946  | 34333353 | 27561803 | 1.05E+08 | 1.01E+08 | 99421577 | 63.49 | 5 | 571   | 5     |     |     |   |
| FALSE | Master Prc259 | 4502167   | amyloid be           | 9  | 5 | 46 | 5 | 1 | 770  | 86.9  | 4.82  | High      | 27428946  | 34333353 | 27561803 | 1.05E+08 | 1.01E+08 | 99421577 | 63.49 | 5 | 571   | 5     |     |     |   |
| FALSE | Master Prc259 | 41406055  | amyloid be           | 9  | 5 | 46 | 5 | 1 | 751  | 84.8  | 4.79  | High      | 27428946  | 34333353 | 27561803 | 1.05E+08 | 1.01E+08 | 99421577 | 63.49 | 5 | 571   | 5     |     |     |   |
| FALSE | Master Prc259 | 32402173E | amyloid be           | 9  | 5 | 46 | 5 | 1 | 752  | 85    | 4.81  | High      | 27428946  | 34333353 | 27561803 | 1.05E+08 | 1.01E+08 | 99421577 | 63.49 | 5 | 571   | 5     |     |     |   |
| FALSE | Master Prc259 | 20991557E | amyloid be           | 10 | 5 | 46 | 5 | 1 | 714  | 80.8  | 4.82  | High      | 27428946  | 34333353 | 27561803 | 1.05E+08 | 1.01E+08 | 99421577 | 63.49 | 5 | 571   | 5     |     |     |   |
| FALSE | Master Prc259 | 20991557E | amyloid be           | 11 | 5 | 46 | 5 | 1 | 660  | 75.1  | 4.84  | High      | 27428946  | 34333353 | 27561803 | 1.05E+08 | 1.01E+08 | 99421577 | 63.49 | 5 | 571   | 5     |     |     |   |
| FALSE | Master Prc140 | 29550838  | GolgI mem            | 15 | 5 | 46 | 5 | 1 | 401  | 45.3  | 4.97  | High      | 6066715   | 15853680 | 12949488 | 22862416 | 27887201 | 8391811  | 63.31 | 5 | 412   | 5     |     |     |   |
| FALSE | Master Prc77  | 11939575E | keratin, tyf         | 9  | 5 | 46 | 4 | 1 | 644  | 66    | 8.12  | High      | 6611158   | 7495992  | 6846045  | 19726503 | 14321482 | 16467112 | 62.19 | 5 | 575   | 5     |     |     |   |
| FALSE | Master Prc199 | 35594475C | clusterin [I         | 9  | 3 | 40 | 3 | 1 | 449  | 52.5  | 6.27  | High      | 8197401   | 10083892 | 11157771 | 8822967  | 8070459  | 8101383  | 59.79 | 3 | 609   | 3     |     |     |   |
| FALSE | Master Prc199 | 578815184 | PREDICTED            | 8  | 3 | 40 | 3 | 1 | 501  | 57.8  | 6.68  | High      | 8197401   | 10083892 | 11157771 | 8822967  | 8070459  | 8101383  | 59.79 | 3 | 609   | 3     |     |     |   |
| FALSE | Master Prc122 | 5803011   | gamma-en             |    |   |    |   |   |      |       |       |           |           |           |           |           |           |           |           |          |          |          |          |          |       |   |       |       |     |     |   |

|       |               |           |              |             |    |    |    |   |      |       |       |           |           |           |           |           |           |           |          |          |          |          |          |           |       |     |     |   |
|-------|---------------|-----------|--------------|-------------|----|----|----|---|------|-------|-------|-----------|-----------|-----------|-----------|-----------|-----------|-----------|----------|----------|----------|----------|----------|-----------|-------|-----|-----|---|
| FALSE | Master Prc210 | 4502101   | annexin A1   | 17          | 4  | 41 | 4  | 1 | 346  | 38.7  | 7.02  | High      | 4669011  | 4471245  | 6120916  | 13605682 | 7193137  | 7906737   | 50.6  | 4   | 399 | 4 |
| FALSE | Master Prc150 | 342187211 | fructose-bi  | 10          | 3  | 33 | 3  | 1 | 418  | 45.2  | 8.25  | High      | 76256591 | 1.03E+08 | 95008656 | 1.26E+08 | 1.1E+08  | 1.81E+08  | 50.47 | 3   | 431 | 3 |
| FALSE | Master Prc150 | 4557305   | fructose-bi  | 11          | 3  | 33 | 3  | 1 | 364  | 39.4  | 8.09  | High      | 76256591 | 1.03E+08 | 95008656 | 1.26E+08 | 1.1E+08  | 1.81E+08  | 50.47 | 3   | 431 | 3 |
| FALSE | Master Prc45  | 58761500  | obg-like AT  | 10          | 3  | 29 | 3  | 1 | 396  | 44.7  | 7.81  | High      | 9191094  | 5100092  | 9146397  | 11552279 | 11698734 | 13883666  | 50.43 | 3   | 694 | 3 |
| FALSE | Master Prc244 | 4507585   | tumor necr   | 18          | 4  | 36 | 4  | 1 | 300  | 32.7  | 8.24  | High      | 14249107 | 26134067 | 24646245 | 22128555 | 21706509 | 23456959  | 50.33 | 3   | 315 | 4 |
| FALSE | Master Prc35  | 163965364 | nascent po   | 20          | 3  | 30 | 3  | 1 | 215  | 23.4  | 4.56  | High      | 12792230 | 14966184 | 6749932  | 19701649 | 18521915 | 24154728  | 50.12 | 3   | 533 | 3 |
| FALSE | Master Prc35  | 578823766 | PREDICTED    | 2           | 3  | 30 | 3  | 1 | 2082 | 205.6 | 9.6   | High      | 12792230 | 14966184 | 6749932  | 19701649 | 18521915 | 24154728  | 50.12 | 3   | 533 | 3 |
| FALSE | Master Prc35  | 578823776 | PREDICTED    | 2           | 3  | 30 | 3  | 1 | 2059 | 203.6 | 9.57  | High      | 12792230 | 14966184 | 6749932  | 19701649 | 18521915 | 24154728  | 50.12 | 3   | 533 | 3 |
| FALSE | Master Prc35  | 333033787 | nascent po   | 5           | 3  | 30 | 3  | 1 | 925  | 94.6  | 5.14  | High      | 12792230 | 14966184 | 6749932  | 19701649 | 18521915 | 24154728  | 50.12 | 3   | 533 | 3 |
| FALSE | Master Prc35  | 578823766 | PREDICTED    | 2           | 3  | 30 | 3  | 1 | 2078 | 205.3 | 9.58  | High      | 12792230 | 14966184 | 6749932  | 19701649 | 18521915 | 24154728  | 50.12 | 3   | 533 | 3 |
| FALSE | Master Prc35  | 578823772 | PREDICTED    | 2           | 3  | 30 | 3  | 1 | 2035 | 201.3 | 9.55  | High      | 12792230 | 14966184 | 6749932  | 19701649 | 18521915 | 24154728  | 50.12 | 3   | 533 | 3 |
| FALSE | Master Prc35  | 578823776 | PREDICTED    | 19          | 3  | 30 | 3  | 1 | 219  | 23.7  | 4.59  | High      | 12792230 | 14966184 | 6749932  | 19701649 | 18521915 | 24154728  | 50.12 | 3   | 533 | 3 |
| FALSE | Master Prc149 | 530415126 | PREDICTED    | 14          | 4  | 32 | 3  | 1 | 248  | 28.6  | 4.7   | High      | 3398679  | 9526211  | 7371355  |          | 16768081 | 17074824  | 49.91 | 4   | 311 | 4 |
| FALSE | Master Prc149 | 4507651   | tropomyos    | 14          | 4  | 32 | 3  | 1 | 248  | 28.5  | 4.69  | High      | 3398679  | 9526211  | 7371355  |          | 16768081 | 17074824  | 49.91 | 4   | 311 | 4 |
| FALSE | Master Prc108 | 39777597  | protein-glu  | 6           | 3  | 38 | 3  | 1 | 687  | 77.3  | 5.22  | High      | 7498575  | 7132735  | 7420309  | 14853683 | 11305333 | 12898559  | 49.1  | 3   | 295 | 3 |
| FALSE | None          | 32        | 55749932     | desmin [Hc  | 3  | 2  | 30 | 2 | 1    | 470   | 53.5  | 5.27      | High      | High      | High      | High      | High      | High      | 39412688 | 59194171 | 46489965 | 41363460 | 39862769 | 6463263   | 48.7  | 2   | 366 | 2 |
| FALSE | Master Prc12  | 66392203  | NME1-NM      | 27          | 3  | 42 | 3  | 1 | 267  | 30.1  | 8.92  | High      | 22306834 | 18310787 | 19704327 | 59006527 | 58210547 | 55696055  | 48.24 | 3   | 232 | 3 |
| FALSE | Master Prc12  | 4505409   | nucleoside   | 29          | 3  | 42 | 3  | 1 | 152  | 17.3  | 8.41  | High      | 22306834 | 18310787 | 19704327 | 59006527 | 58210547 | 55696055  | 48.24 | 3   | 232 | 3 |
| FALSE | Master Prc272 | 4757900   | calreticulim | 10          | 4  | 41 | 4  | 1 | 417  | 48.1  | 4.44  | High      | 29417323 | 15266302 | 31991954 | 32470688 | 31974030 | 22346728  | 47.78 | 4   | 415 | 4 |
| FALSE | None          | 40        | 56775755E    | SET-like pr | 8  | 2  | 29 | 2 | 1    | 302   | 34.9  | 4.31      | High      | High      | High      | High      | High      | High      | 53324841 | 16972543 | 61820282 | 81581815 | 30531802 | 86175106  | 47.71 | 2   | 411 | 2 |
| FALSE | None          | 280       | 38447551I    | triosephos  | 17 | 2  | 33 | 2 | 1    | 167   | 17.9  | 5.58      | High      | High      | High      | High      | High      | High      | 69777125 | 59379805 | 59161891 | 1.73E+08 | 1.61E+08 | 1.69E+08  | 46.77 | 2   | 324 | 2 |
| FALSE | Master Prc89  | 4758638   | peroxiredo   | 23          | 4  | 34 | 4  | 1 | 224  | 25    | 6.38  | High      | 18193900 | 29925549 | 26783242 | 24677026 | 19621984 | 48685608  | 46.77 | 4   | 338 | 4 |
| FALSE | Master Prc217 | 5032057   | protein S1C  | 15          | 1  | 28 | 1  | 1 | 105  | 11.7  | 7.12  | High      | 23909412 | 24231844 | 26933020 | 30446882 | 29211469 | 26245877  | 46.61 | 1   | 592 | 1 |
| FALSE | Master Prc    | 63055057  | beta-actin   | 9           | 4  | 38 | 0  | 0 | 376  | 42    | 5.59  | Not Found |          |          |          |          |          |           | 45.95 | 4   | 384 | 4 |
| FALSE | Master Prc52  | 4507509   | metallopro   | 10          | 2  | 38 | 2  | 1 | 207  | 23.2  | 8.1   | High      | 4.93E+08 | 5.43E+08 | 4.19E+08 | 6.13E+08 | 6.08E+08 | 6.45E+08  | 45.53 | 2   | 198 | 2 |
| FALSE | Master Prc98  | 4505863   | urokinase-   | 11          | 4  | 53 | 4  | 1 | 431  | 48.5  | 8.41  | High      | 18230889 | 28381598 | 34835207 | 38758425 | 54943432 | 58352792  | 43.74 | 4   | 206 | 4 |
| FALSE | Master Prc98  | 22253775E | urokinase-   | 11          | 4  | 53 | 4  | 1 | 414  | 46.9  | 8.44  | High      | 18230889 | 28381598 | 34835207 | 38758425 | 54943432 | 58352792  | 43.74 | 4   | 206 | 4 |
| FALSE | Master Prc214 | 10835063  | nucleopho    | 5           | 1  | 28 | 1  | 1 | 294  | 32.6  | 4.78  | High      | 7447687  | 6291018  | 5388215  | 13645667 | 10651596 | 13871601  | 43.54 | 1   | 268 | 1 |
| FALSE | Master Prc214 | 40353734  | nucleopho    | 5           | 1  | 28 | 1  | 1 | 265  | 29.4  | 4.61  | High      | 7447687  | 6291018  | 5388215  | 13645667 | 10651596 | 13871601  | 43.54 | 1   | 268 | 1 |
| FALSE | None          | 32        | 21264345     | peripherin  | 4  | 2  | 34 | 2 | 1    | 470   | 53.6  | 5.47      | High      | High      | High      | High      | High      | High      | 40690058 | 98480632 | 44352724 | 2.17E+08 | 1.11E+08 | 1.16E+08  | 43.52 | 2   | 239 | 2 |
| FALSE | None          | 32        | 53040057I    | PREDICTED   | 4  | 2  | 34 | 2 | 1    | 471   | 53.7  | 5.47      | High      | High      | High      | High      | High      | High      | 40690058 | 98480632 | 44352724 | 2.17E+08 | 1.11E+08 | 1.16E+08  | 43.52 | 2   | 239 | 2 |
| FALSE | None          | 51        | 578801443    | PREDICTED   | 11 | 3  | 33 | 2 | 1    | 285   | 33.2  | 4.77      | Not Found | Not Found | High      | High      | High      | High      |          | 4170426  | 17662123 | 17578023 | 17607685 | 43.48     | 3     | 132 | 3   |   |
| FALSE | None          | 51        | 578801445    | PREDICTED   | 11 | 3  | 33 | 2 | 1    | 285   | 33    | 4.74      | Not Found | Not Found | High      | High      | High      | High      |          | 4170426  | 17662123 | 17578023 | 17607685 | 43.48     | 3     | 132 | 3   |   |
| FALSE | None          | 51        | 578801447    | PREDICTED   | 11 | 3  | 33 | 2 | 1    | 284   | 33.1  | 4.79      | Not Found | Not Found | High      | High      | High      | High      |          | 4170426  | 17662123 | 17578023 | 17607685 | 43.48     | 3     | 132 | 3   |   |
| FALSE | None          | 51        | 578801441    | PREDICTED   | 11 | 3  | 33 | 2 | 1    | 285   | 33.1  | 4.74      | Not Found | Not Found | High      | High      | High      | High      |          | 4170426  | 17662123 | 17578023 | 17607685 | 43.48     | 3     | 132 | 3   |   |
| FALSE | None          | 51        | 578801445    | PREDICTED   | 11 | 3  | 33 | 2 | 1    | 284   | 33    | 4.77      | Not Found | Not Found | High      | High      | High      | High      |          | 4170426  | 17662123 | 17578023 | 17607685 | 43.48     | 3     | 132 | 3   |   |
| FALSE | None          | 51        | 11415514C    | tropomyos   | 11 | 3  | 33 | 2 | 1    | 285   | 32.9  | 4.72      | Not Found | Not Found | High      | High      | High      | High      |          | 4170426  | 17662123 | 17578023 | 17607685 | 43.48     | 3     | 132 | 3   |   |
| FALSE | None          | 51        | 578801433    | PREDICTED   | 11 | 3  | 33 | 2 | 1    | 285   | 33.1  | 4.74      | Not Found | Not Found | High      | High      | High      | High      |          | 4170426  | 17662123 | 17578023 | 17607685 | 43.48     | 3     | 132 | 3   |   |
| FALSE | Master Prc135 | 4505621   | pHosphatic   | 18          | 2  | 24 | 2  | 1 | 187  | 21    | 7.53  | High      | 30555797 | 38699437 | 30732387 | 47397786 | 47401064 | 196066196 | 43.21 | 2   | 717 | 2 |
| FALSE | None          | 137       | 4503475      | elongation  | 7  | 3  | 43 | 3 | 1    | 463   | 50.4  | 9.03      | High      | High      | High      | High      | High      | High      | 1.59E+08 | 1.73E+08 | 1.15E+08 | 2.42E+08 | 2.35E+08 | 2.58E+08  | 42.67 | 3   | 240 | 3 |
| FALSE | Master Prc48  | 578810783 | PREDICTED    | 8           | 2  | 22 | 2  | 1 | 466  | 52.1  | 5.52  | High      | 2461826  | 2593221  | 2038195  | 1441495  | 6184971  | 7994451   | 42.16 | 2   | 359 | 2 |
| FALSE | None          | 15,195    | 475808427    | POTE anky   | 3  | 5  | 40 | 0 | 2    | 1075  | 121.2 | 6.21      | Not Found |          |          |          |          |          |           | 40.99 | 5   | 207 | 5 |
| FALSE | Master Prc220 | 4507511   | metallopro   | 7           | 2  | 24 | 2  | 1 | 220  | 24.4  | 7.49  | High      | 53484255 | 71565094 | 70170293 | 74604086 | 71592726 | 74801975  | 40.86 | 2   | 467 | 2 |
| FALSE | Master Prc100 | 66346679  | plasmingoc   | 8           | 2  | 22 | 2  | 1 | 408  | 44.9  | 8.65  | High      | High      | High      | High      | High      | High      | Not Found | 12617408 | 11612700 | 4831045  | 3404454  |          |           | 40.28 | 2   | 500 | 2 |
| FALSE | Master Prc100 | 66346681  | plasmingoc   | 8           | 2  | 22 | 2  | 1 | 402  | 44.2  | 8.66  | High      | High      | High      | High      | High      | High      | Not Found | 12617408 | 11612700 | 4831045  | 3404454  |          |           | 40.28 | 2   | 500 | 2 |
| FALSE | Master Prc100 | 66346685  | plasmingoc   | 9           | 2  | 22 | 2  | 1 | 387  | 42.4  | 8.44  | High      | High      | High      | High      | High      | High      | Not Found | 12617408 | 11612700 | 4831045  | 3404454  |          |           | 40.28 | 2   | 500 | 2 |
| FALSE | Master Prc100 | 66346683  | plasmingoc   | 9           | 2  | 22 | 2  | 1 | 393  | 43.1  | 8.44  | High      | High      | High      | High      | High      | High      | Not Found | 12617408 | 11612700 | 4831045  | 3404454  |          |           | 40.28 | 2   | 500 | 2 |
| FALSE | Master Prc172 | 4504323   | histone H4   | 41          | 4  | 40 | 4  | 1 | 103  | 11.4  | 11.36 | High      | 1.19E+08 | 1.79E+08 | 1.28E+08 | 1.42E+08 | 1.02E+08 | 1.04E+08  | 40.02 | 4   | 198 | 4 |
| FALSE | Master Prc242 | 6598323   | rab GDP di   | 7           | 2  | 24 | 2  | 1 | 445  | 50.6  | 6.47  | Not Found | Not Found | High      | High      | High      | High      | High      |          | 5603756  | 2843112  | 4753351  | 10850701 | 39.71     | 2     | 213 | 2   |   |
| FALSE | Master Prc44  | 34098946  | nuclease-s   | 10          | 2  | 21 | 2  | 1 | 324  | 35.9  | 9.88  | High      | 14128290 | 17431752 | 5771428  | 8644132  | 9122102  | 9631546   | 38.22 | 2   | 399 | 2 |
| FALSE | Master Prc44  | 224586882 | Y-box-bind   | 9           | 2  | 21 | 2  | 1 | 372  | 40.1  | 9.77  | High      | 14128290 | 17431752 | 5771428  | 8644132  | 9122102  | 9631546   | 38.22 | 2   | 399 | 2 |
| FALSE | Master Prc44  | 156       |              |             |    |    |    |   |      |       |       |           |           |           |           |           |           |           |          |          |          |          |          |           |       |     |     |   |



|       |               |          |              |             |   |    |    |   |      |       |      |           |           |           |           |           |           |           |          |          |          |          |          |          |          |          |       |    |     |   |
|-------|---------------|----------|--------------|-------------|---|----|----|---|------|-------|------|-----------|-----------|-----------|-----------|-----------|-----------|-----------|----------|----------|----------|----------|----------|----------|----------|----------|-------|----|-----|---|
| FALSE | Master Prc112 | 19923193 | hsc70-inte   | 10          | 3 | 21 | 3  | 1 | 369  | 41.3  | 5.27 | High      | 11934621 | 14398391 | 13925772 | 25610209 | 24015433 | 23861196 | 25.45    | 3        | 110   | 3  |     |   |
| FALSE | Master Prc5   | 4503481  | elongation   | 8           | 4 | 21 | 4  | 1 | 437  | 50.1  | 6.67 | High      | 7901745  | 12970506 | 10861329 | 20490977 | 22511115 | 20530979 | 25.45    | 4        | 247   | 4  |     |   |
| FALSE | Master Prc125 | 53039432 | PREDICTED    | 7           | 6 | 24 | 6  | 1 | 1135 | 123.9 | 5.71 | Not Found | Not Found | Not Found | High      | High      | High      | High      |          |          |          | 18003014 | 18922668 | 19068544 | 25.43    | 6        | 152   | 6  |     |   |
| FALSE | Master Prc125 | 53039433 | PREDICTED    | 7           | 6 | 24 | 6  | 1 | 1067 | 116.8 | 6.16 | Not Found | Not Found | Not Found | High      | High      | High      | High      |          |          |          | 18003014 | 18922668 | 19068544 | 25.43    | 6        | 152   | 6  |     |   |
| FALSE | Master Prc125 | 4507877  | vinculin iso | 7           | 6 | 24 | 6  | 1 | 1066 | 116.6 | 6.09 | Not Found | Not Found | Not Found | High      | High      | High      | High      |          |          |          | 18003014 | 18922668 | 19068544 | 25.43    | 6        | 152   | 6  |     |   |
| FALSE | Master Prc125 | 7669550  | vinculin iso | 7           | 6 | 24 | 6  | 1 | 1134 | 123.7 | 5.66 | Not Found | Not Found | Not Found | High      | High      | High      | High      |          |          |          | 18003014 | 18922668 | 19068544 | 25.43    | 6        | 152   | 6  |     |   |
| FALSE | None          | 162_178  | 282396082    | heterogen   | 7 | 2  | 20 | 0 | 2    | 293   | 32   | 5.43      | Not Found |          |          |          |          |          |          | 25.08    | 2        | 201   | 2  |     |   |
| FALSE | Master Prc157 | 21464101 | 14-3-3 pro   | 13          | 3 | 22 | 3  | 1 | 247  | 28.3  | 4.89 | High      | 10574784 | 12483617 | 6783402  | 55725572 | 80760292 | 59535908 | 25.07    | 3        | 235   | 3  |     |   |
| FALSE | None          | 127      | 4506467      | radixin iso | 3 | 2  | 23 | 2 | 1    | 583   | 68.5 | 6.37      | High      | High      | High      | High      | High      | High      | 27316685 | 40799747 | 28580998 | 59860077 | 58370982 | 56297532 | 24.74    | 2        | 232   | 2  |     |   |
| FALSE | None          | 127      | 38678157     | radixin iso | 3 | 2  | 23 | 2 | 1    | 604   | 71   | 6.71      | High      | High      | High      | High      | High      | High      | 27316685 | 40799747 | 28580998 | 59860077 | 58370982 | 56297532 | 24.74    | 2        | 232   | 2  |     |   |
| FALSE | None          | 127      | 4505257      | moesin [h   | 3 | 2  | 23 | 2 | 1    | 577   | 67.8 | 6.4       | High      | High      | High      | High      | High      | High      | 27316685 | 40799747 | 28580998 | 59860077 | 58370982 | 56297532 | 24.74    | 2        | 232   | 2  |     |   |
| FALSE | None          | 127      | 38678158     | radixin iso | 4 | 2  | 23 | 2 | 1    | 447   | 52.6 | 6.16      | High      | High      | High      | High      | High      | High      | 27316685 | 40799747 | 28580998 | 59860077 | 58370982 | 56297532 | 24.74    | 2        | 232   | 2  |     |   |
| FALSE | None          | 127      | 53042175     | PREDICTED   | 3 | 2  | 23 | 2 | 1    | 578   | 67.9 | 6.28      | High      | High      | High      | High      | High      | High      | 27316685 | 40799747 | 28580998 | 59860077 | 58370982 | 56297532 | 24.74    | 2        | 232   | 2  |     |   |
| FALSE | None          | 149      | 530390127    | PREDICTED   | 9 | 2  | 20 | 1 | 1    | 213   | 24.7 | 4.74      | Not Found | Not Found | Not Found | High      | High      | High      |          |          |          |          |          | 16768081 | 17074824 | 24.74    | 2     | 63 | 2   |   |
| FALSE | None          | 149      | 22355597     | tropomyos   | 7 | 2  | 20 | 1 | 1    | 284   | 32.7 | 4.73      | Not Found | Not Found | Not Found | High      | High      | High      |          |          |          |          |          | 16768081 | 17074824 | 24.74    | 2     | 63 | 2   |   |
| FALSE | None          | 149      | 42476296     | tropomyos   | 7 | 2  | 20 | 1 | 1    | 284   | 32.8 | 4.7       | Not Found | Not Found | Not Found | High      | High      | High      |          |          |          |          |          | 16768081 | 17074824 | 24.74    | 2     | 63 | 2   |   |
| FALSE | None          | 149      | 53039011     | PREDICTED   | 7 | 2  | 20 | 1 | 1    | 303   | 34.1 | 5.1       | Not Found | Not Found | Not Found | High      | High      | High      |          |          |          |          |          | 16768081 | 17074824 | 24.74    | 2     | 63 | 2   |   |
| FALSE | None          | 149      | 53039012     | PREDICTED   | 7 | 2  | 20 | 1 | 1    | 284   | 32.8 | 4.68      | Not Found | Not Found | Not Found | High      | High      | High      |          |          |          |          |          | 16768081 | 17074824 | 24.74    | 2     | 63 | 2   |   |
| FALSE | None          | 149      | 47519616     | tropomyos   | 7 | 2  | 20 | 1 | 1    | 284   | 33   | 4.67      | Not Found | Not Found | Not Found | High      | High      | High      |          |          |          |          |          | 16768081 | 17074824 | 24.74    | 2     | 63 | 2   |   |
| FALSE | None          | 149      | 57883354     | PREDICTED   | 7 | 2  | 20 | 1 | 1    | 284   | 32.8 | 4.73      | Not Found | Not Found | Not Found | High      | High      | High      |          |          |          |          |          | 16768081 | 17074824 | 24.74    | 2     | 63 | 2   |   |
| FALSE | None          | 149      | 53039012     | PREDICTED   | 7 | 2  | 20 | 1 | 1    | 284   | 33   | 4.69      | Not Found | Not Found | Not Found | High      | High      | High      |          |          |          |          |          | 16768081 | 17074824 | 24.74    | 2     | 63 | 2   |   |
| FALSE | None          | 51       | 53040639     | PREDICTED   | 7 | 2  | 20 | 1 | 1    | 287   | 33.1 | 4.81      | Not Found | Not Found | Not Found | High      | High      | High      |          |          |          |          |          | 14568511 | 14647778 | 14809722 | 24.43 | 2  | 44  | 2 |
| FALSE | None          | 51       | 53040638     | PREDICTED   | 7 | 2  | 20 | 1 | 1    | 287   | 32.9 | 4.79      | Not Found | Not Found | Not Found | High      | High      | High      |          |          |          |          |          | 14568511 | 14647778 | 14809722 | 24.43 | 2  | 44  | 2 |
| FALSE | None          | 51       | 57882735     | PREDICTED   | 7 | 2  | 20 | 1 | 1    | 284   | 32.8 | 4.77      | Not Found | Not Found | Not Found | High      | High      | High      |          |          |          |          |          | 14568511 | 14647778 | 14809722 | 24.43 | 2  | 44  | 2 |
| FALSE | None          | 51       | 53040641     | PREDICTED   | 8 | 2  | 20 | 1 | 1    | 248   | 28.7 | 4.79      | Not Found | Not Found | Not Found | High      | High      | High      |          |          |          |          |          | 14568511 | 14647778 | 14809722 | 24.43 | 2  | 44  | 2 |
| FALSE | None          | 51       | 63252904     | tropomyos   | 8 | 2  | 20 | 1 | 1    | 245   | 28.4 | 4.77      | Not Found | Not Found | Not Found | High      | High      | High      |          |          |          |          |          | 14568511 | 14647778 | 14809722 | 24.43 | 2  | 44  | 2 |
| FALSE | None          | 51       | 53040639     | PREDICTED   | 7 | 2  | 20 | 1 | 1    | 287   | 33   | 4.79      | Not Found | Not Found | Not Found | High      | High      | High      |          |          |          |          |          | 14568511 | 14647778 | 14809722 | 24.43 | 2  | 44  | 2 |
| FALSE | None          | 51       | 63252900     | tropomyos   | 7 | 2  | 20 | 1 | 1    | 284   | 32.9 | 4.78      | Not Found | Not Found | Not Found | High      | High      | High      |          |          |          |          |          | 14568511 | 14647778 | 14809722 | 24.43 | 2  | 44  | 2 |
| FALSE | None          | 51       | 53040640     | PREDICTED   | 8 | 2  | 20 | 1 | 1    | 251   | 28.8 | 4.83      | Not Found | Not Found | Not Found | High      | High      | High      |          |          |          |          |          | 14568511 | 14647778 | 14809722 | 24.43 | 2  | 44  | 2 |
| FALSE | None          | 51       | 53040641     | PREDICTED   | 8 | 2  | 20 | 1 | 1    | 248   | 28.6 | 4.79      | Not Found | Not Found | Not Found | High      | High      | High      |          |          |          |          |          | 14568511 | 14647778 | 14809722 | 24.43 | 2  | 44  | 2 |
| FALSE | None          | 51       | 53040640     | PREDICTED   | 7 | 2  | 20 | 1 | 1    | 275   | 31.7 | 4.89      | Not Found | Not Found | Not Found | High      | High      | High      |          |          |          |          |          | 14568511 | 14647778 | 14809722 | 24.43 | 2  | 44  | 2 |
| FALSE | None          | 51       | 53040640     | PREDICTED   | 7 | 2  | 20 | 1 | 1    | 284   | 32.6 | 4.73      | Not Found | Not Found | Not Found | High      | High      | High      |          |          |          |          |          | 14568511 | 14647778 | 14809722 | 24.43 | 2  | 44  | 2 |
| FALSE | None          | 51       | 53040641     | PREDICTED   | 8 | 2  | 20 | 1 | 1    | 248   | 28.7 | 4.82      | Not Found | Not Found | Not Found | High      | High      | High      |          |          |          |          |          | 14568511 | 14647778 | 14809722 | 24.43 | 2  | 44  | 2 |
| FALSE | None          | 51       | 63252898     | tropomyos   | 7 | 2  | 20 | 1 | 1    | 284   | 32.7 | 4.74      | Not Found | Not Found | Not Found | High      | High      | High      |          |          |          |          |          | 14568511 | 14647778 | 14809722 | 24.43 | 2  | 44  | 2 |
| FALSE | None          | 51       | 53040640     | PREDICTED   | 7 | 2  | 20 | 1 | 1    | 281   | 32.5 | 4.74      | Not Found | Not Found | Not Found | High      | High      | High      |          |          |          |          |          | 14568511 | 14647778 | 14809722 | 24.43 | 2  | 44  | 2 |
| FALSE | None          | 51       | 63252896     | tropomyos   | 7 | 2  | 20 | 1 | 1    | 284   | 32.7 | 4.75      | Not Found | Not Found | Not Found | High      | High      | High      |          |          |          |          |          | 14568511 | 14647778 | 14809722 | 24.43 | 2  | 44  | 2 |
| FALSE | None          | 51       | 63252906     | tropomyos   | 7 | 2  | 20 | 1 | 1    | 284   | 32.8 | 4.75      | Not Found | Not Found | Not Found | High      | High      | High      |          |          |          |          |          | 14568511 | 14647778 | 14809722 | 24.43 | 2  | 44  | 2 |
| FALSE | None          | 51       | 53040641     | PREDICTED   | 8 | 2  | 20 | 1 | 1    | 245   | 28.5 | 4.78      | Not Found | Not Found | Not Found | High      | High      | High      |          |          |          |          |          | 14568511 | 14647778 | 14809722 | 24.43 | 2  | 44  | 2 |
| FALSE | None          | 51       | 53040641     | PREDICTED   | 8 | 2  | 20 | 1 | 1    | 248   | 28.7 | 4.79      | Not Found | Not Found | Not Found | High      | High      | High      |          |          |          |          |          | 14568511 | 14647778 | 14809722 | 24.43 | 2  | 44  | 2 |
| FALSE | None          | 51       | 53040639     | PREDICTED   | 7 | 2  | 20 | 1 | 1    | 284   | 32.6 | 4.73      | Not Found | Not Found | Not Found | High      | High      | High      |          |          |          |          |          | 14568511 | 14647778 | 14809722 | 24.43 | 2  | 44  | 2 |
| FALSE | None          | 51       | 63252902     | tropomyos   | 7 | 2  | 20 | 1 | 1    | 284   | 32.7 | 4.74      | Not Found | Not Found | Not Found | High      | High      | High      |          |          |          |          |          | 14568511 | 14647778 | 14809722 | 24.43 | 2  | 44  | 2 |
| FALSE | None          | 51       | 27597085     | tropomyos   | 7 | 2  | 20 | 1 | 1    | 284   | 32.8 | 4.77      | Not Found | Not Found | Not Found | High      | High      | High      |          |          |          |          |          | 14568511 | 14647778 | 14809722 | 24.43 | 2  | 44  | 2 |
| FALSE | None          | 51       | 53040638     | PREDICTED   | 6 | 2  | 20 | 1 | 1    | 326   | 37.4 | 4.72      | Not Found | Not Found | Not Found | High      | High      | High      |          |          |          |          |          | 14568511 | 14647778 | 14809722 | 24.43 | 2  | 44  | 2 |
| FALSE | None          | 51       | 53040640     | PREDICTED   | 8 | 2  | 20 | 1 | 1    | 248   | 28.6 | 4.77      | Not Found | Not Found | Not Found | High      | High      | High      |          |          |          |          |          | 14568511 | 14647778 | 14809722 | 24.43 | 2  | 44  | 2 |
| FALSE | None          | 51       | 53040639     | PREDICTED   | 7 | 2  | 20 | 1 | 1    | 287   | 32.9 | 4.77      | Not Found | Not Found | Not Found | High      | High      | High      |          |          |          |          |          | 14568511 | 14647778 | 14809722 | 24.43 | 2  | 44  | 2 |
| FALSE | Master Prc185 | 4503117  | cystatin-B   | 24          | 2 | 18 | 2  | 1 | 98   | 11.1  | 7.56 | High      | 12317933 | 16752194 | 14443968 | 33996386 | 33693132 | 34412022 | 23.64    | 2        | 181   | 2  |     |   |
| FALSE | Master Prc169 | 24797067 | HLA class I  | 7           | 2 | 16 | 2  | 1 | 365  | 40.8  | 6    | High      | 22651040 | 24578780 | 12986287 | 29336741 | 26966766 | 28162206 | 23.62    | 2        | 224   | 2  |     |   |
| FALSE | Master Prc169 | 57884185 | PREDICTED    | 6           | 2 | 16 | 2  | 1 | 434  | 47.8  | 6.6  | High      | 22651040 | 24578780 | 12986287 | 29336741 | 26966766 | 28162206 | 23.62    | 2        | 224   | 2  |     |   |
| FALSE | Master Prc169 | 33775217 | HLA class I  | 7           | 2 | 16 | 2  | 1 | 365  | 40.8  | 6.54 | High      | 22651040 | 24578780 | 12986287 | 29336741 | 26966766 | 28162206 | 23.62    | 2        | 224   | 2  |     |   |
| FALSE | Master Prc169 | 57884185 | PREDICTED    | 7           | 2 | 16 | 2  | 1 | 405  | 44.5  | 6.16 | High      | 22651040 | 24578780 | 12986287 | 29336741 | 26966766 | 28162206 | 23.62    | 2        | 224   | 2  |     |   |
| FALSE | Master Prc169 | 53042892 | PREDICTED    | 9           | 2 | 16 | 2  | 1 | 391  | 43.8  | 6.74 | High      | 22651040 | 24578780 | 12986287 | 29336741 | 26966766 | 28162206 | 23.62    | 2        | 224   | 2  |     |   |
| FALSE | Master Prc229 | 41399285 | 60 kDa hea   | 7           | 4 | 23 | 4  | 1 | 573  | 61    | 5.87 | Not Found | Not Found | Not Found | High      | High      | High      | High      |          |          |          |          |          | 29251388 | 30355112 | 30329654 | 23.36 | 4  | 115 | 4 |
| FALSE | Master Prc37  | 4757768  | rho GDP-di   | 15          | 2 | 21 | 2  | 1 | 204  | 23.2  | 5.11 | High      | 23257393 | 36564586 | 29189092 | 50980702 | 57960409 | 57677072 | 23.25    | 2        | 243   | 2  |     |   |
| FALSE | None          | 121      | 31543397     | phosphogh   |   |    |    |   |      |       |      |           |           |           |           |           |           |           |          |          |          |          |          |          |          |          |       |    |     |   |

|       |                |                        |                      |    |    |    |   |     |      |       |           |           |           |           |           |           |           |          |          |          |          |          |          |         |       |     |     |   |
|-------|----------------|------------------------|----------------------|----|----|----|---|-----|------|-------|-----------|-----------|-----------|-----------|-----------|-----------|-----------|----------|----------|----------|----------|----------|----------|---------|-------|-----|-----|---|
| FALSE | Master Prc 4   | 37854819C.40S ribosa   | 11                   | 2  | 14 | 2  | 1 | 243 | 26.7 | 9.66  | High      | High      | High      | High      | High      | High      | 4438669   | 4487196  | 5365041  | 18343687 | 19215909 | 13894165 | 20.89    | 2       | 200   | 2   |     |   |
| FALSE | Master Prc 213 | 4505641 proliferatir   | 5                    | 1  | 12 | 1  | 1 | 261 | 28.8 | 4.69  | High      | High      | High      | High      | High      | High      | 6214403   |          | 6082034  | 15787868 | 14040281 | 14631102 | 20.87    | 1       | 282   | 1   |     |   |
| FALSE | Master Prc 144 | 21733064c activated R  | 19                   | 2  | 21 | 2  | 1 | 127 | 14.4 | 9.6   | High      | High      | High      | High      | High      | High      | 24853437  | 21695458 | 21202878 | 24079122 | 14891410 | 14687966 | 20.75    | 2       | 234   | 2   |     |   |
| FALSE | Master Prc 187 | 11543022c galectin-3 i | 14                   | 3  | 27 | 3  | 1 | 250 | 26.1 | 8.56  | Not Found | Not Found | High      | High      | High      | High      |           |          | 18590507 | 50004353 | 50625623 | 44018002 | 20.45    | 3       | 75    | 3   |     |   |
| FALSE | Master Prc 59  | 4506901 serine/argi    | 9                    | 1  | 16 | 1  | 1 | 164 | 19.3 | 11.65 | High      | High      | High      | High      | Not Found | Not Found | 9253220   | 8397431  | 7580984  | 13855674 |          |          | 20.37    | 1       | 166   | 1   |     |   |
| FALSE | Master Prc 59  | 53036794d PREDICTED    | 6                    | 1  | 16 | 1  | 1 | 235 | 26.9 | 11.85 | High      | High      | High      | High      | Not Found | Not Found | 9253220   | 8397431  | 7580984  | 13855674 |          |          | 20.37    | 1       | 166   | 1   |     |   |
| FALSE | Master Prc 59  | 30648269d serine/argi  | 6                    | 1  | 16 | 1  | 1 | 226 | 26   | 11.77 | High      | High      | High      | High      | Not Found | Not Found | 9253220   | 8397431  | 7580984  | 13855674 |          |          | 20.37    | 1       | 166   | 1   |     |   |
| FALSE | Master Prc 59  | 53036794d PREDICTED    | 6                    | 1  | 16 | 1  | 1 | 223 | 25.6 | 11.8  | High      | High      | High      | High      | Not Found | Not Found | 9253220   | 8397431  | 7580984  | 13855674 |          |          | 20.37    | 1       | 166   | 1   |     |   |
| FALSE | Master Prc 59  | 53036794d PREDICTED    | 10                   | 1  | 16 | 1  | 1 | 137 | 15.8 | 9.8   | High      | High      | High      | High      | Not Found | Not Found | 9253220   | 8397431  | 7580984  | 13855674 |          |          | 20.37    | 1       | 166   | 1   |     |   |
| FALSE | Master Prc 59  | 72534660 serine/argi   | 6                    | 1  | 16 | 1  | 1 | 238 | 27.4 | 11.82 | High      | High      | High      | High      | Not Found | Not Found | 9253220   | 8397431  | 7580984  | 13855674 |          |          | 20.37    | 1       | 166   | 1   |     |   |
| FALSE | Master Prc 57  | 57880084d PREDICTED    | 24                   | 2  | 17 | 2  | 1 | 136 | 15.1 | 9.82  | High      | High      | High      | High      | High      | High      | 8020556   | 6637279  | 6667476  | 8213457  | 8224431  | 8244191  | 20.34    | 1       | 110   | 2   |     |   |
| FALSE | Master Prc 57  | 4758516 hepatoma-      | 14                   | 2  | 17 | 2  | 1 | 240 | 26.8 | 4.73  | High      | High      | High      | High      | High      | High      | 8020556   | 6637279  | 6667476  | 8213457  | 8224431  | 8244191  | 20.34    | 1       | 110   | 2   |     |   |
| FALSE | Master Prc 57  | 57880084d PREDICTED    | 28                   | 2  | 17 | 2  | 1 | 120 | 13.7 | 9.6   | High      | High      | High      | High      | High      | High      | 8020556   | 6637279  | 6667476  | 8213457  | 8224431  | 8244191  | 20.34    | 1       | 110   | 2   |     |   |
| FALSE | Master Prc 57  | 18692881c hepatoma-    | 13                   | 2  | 17 | 2  | 1 | 256 | 28.2 | 4.79  | High      | High      | High      | High      | High      | High      | 8020556   | 6637279  | 6667476  | 8213457  | 8224431  | 8244191  | 20.34    | 1       | 110   | 2   |     |   |
| FALSE | Master Prc 57  | 18692882c hepatoma-    | 14                   | 2  | 17 | 2  | 1 | 233 | 25.5 | 4.55  | High      | High      | High      | High      | High      | High      | 8020556   | 6637279  | 6667476  | 8213457  | 8224431  | 8244191  | 20.34    | 1       | 110   | 2   |     |   |
| FALSE | Master Prc 184 | 4885375 histone H1     | 10                   | 3  | 17 | 3  | 1 | 213 | 21.4 | 10.93 | High      | High      | High      | High      | High      | High      | 61646498  | 62959053 | 33854361 | 1.2E+08  | 1.5E+08  | 53072735 | 20.24    | 3       | 106   | 3   |     |   |
| FALSE | Master Prc 184 | 4885379 histone H1     | 10                   | 3  | 17 | 3  | 1 | 219 | 21.9 | 11.03 | High      | High      | High      | High      | High      | High      | 61646498  | 62959053 | 33854361 | 1.2E+08  | 1.5E+08  | 53072735 | 20.24    | 3       | 106   | 3   |     |   |
| FALSE | Master Prc 184 | 4885377 histone H1     | 10                   | 3  | 17 | 3  | 1 | 221 | 22.3 | 11.02 | High      | High      | High      | High      | High      | High      | 61646498  | 62959053 | 33854361 | 1.2E+08  | 1.5E+08  | 53072735 | 20.24    | 3       | 106   | 3   |     |   |
| FALSE | None           | 175                    | 20702849L-Lactate d  | 15 | 3  | 21 | 3 | 1   | 274  | 30.2  | 7.15      | High      | High      | High      | High      | High      |           |          | 8777567  |          | 44725613 | 40095415 | 70259028 | 20.21   | 3     | 151 | 3   |   |
| FALSE | Master Prc 87  | 4507149 superoxide     | 9                    | 1  | 14 | 1  | 1 | 154 | 15.9 | 6.13  | High      | High      | High      | High      | High      | High      | 1.06E+08  | 1.25E+08 | 1.08E+08 | 1.7E+08  | 1.74E+08 |          | 1.73E+08 | 20.06   | 1     | 237 | 1   |   |
| FALSE | Master Prc 54  | 11056061 thymosin b    | 41                   | 2  | 19 | 2  | 1 | 44  | 5.1  | 5.06  | High      | High      | High      | Not Found | Not Found | High      | 7177948   | 4.98E+08 | 3.68E+08 |          |          |          | 8589289  | 19.4    | 2     | 144 | 2   |   |
| FALSE | Master Prc 7   | 7706495 dnai homo      | 8                    | 2  | 12 | 2  | 1 | 358 | 40.5 | 6.18  | High      | High      | High      | High      | Not Found | Not Found | 5290964   | 9754559  | 9665594  |          |          |          |          | 19.35   | 2     | 146 | 2   |   |
| FALSE | Master Prc 176 | 4502491 compleme       | 10                   | 3  | 17 | 3  | 1 | 282 | 31.3 | 4.84  | Not Found | Not Found | Not Found | High      | High      | High      |           |          |          |          | 27462942 | 29463617 | 20934479 | 19.31   | 3     | 187 | 3   |   |
| FALSE | Master Prc 201 | 4503483 elongation     | 2                    | 1  | 17 | 1  | 1 | 858 | 95.3 | 6.83  | High      | High      | High      | High      | High      | High      |           |          | 1343601  |          |          |          | 5529606  | 19.14   | 1     | 139 | 1   |   |
| FALSE | None           | 200                    | 30455588c elongation | 5  | 1  | 12 | 1 | 1   | 262  | 29.1  | 5.03      | High      | High      | High      | Not Found | Not Found | High      | 5669260  |          |          |          |          |          | 8877615 | 19.11 | 1   | 190 | 1 |
| FALSE | None           | 13,102                 | 15572298c heat shock | 2  | 1  | 12 | 0 | 2   | 704  | 80.1  | 8.21      | Not Found |          |          |          |          |          |          |         | 19.1  | 1   | 203 | 1 |
| FALSE | None           | 13,102                 | 44030985c heat shock | 2  | 1  | 12 | 0 | 2   | 651  | 74.2  | 7.87      | Not Found |          |          |          |          |          |          |         | 19.1  | 1   | 203 | 1 |
| FALSE | Master Prc 19  | 4507677 endoplasm      | 3                    | 2  | 14 | 1  | 1 | 803 | 92.4 | 4.84  | High      | Not Found |           |          | 3825282  |          |          |          |          |         | 19.1  | 2   | 190 | 2 |
| FALSE | Master Prc 183 | 21700763 hematol       | 15                   | 2  | 12 | 2  | 1 | 190 | 20.1 | 9.26  | High      | High      | High      | High      | Not Found | Not Found | 9499850   | 10950027 | 10513499 |          |          |          |          | 18.96   | 2     | 166 | 2   |   |
| FALSE | Master Prc 263 | 52807835c proteasom    | 10                   | 2  | 14 | 2  | 1 | 236 | 27.2 | 5.83  | Not Found | High      | High      | High      | High      | High      |           |          | 1610027  | 2017222  | 11333078 | 3985831  | 6722078  | 18.81   | 2     | 119 | 2   |   |
| FALSE | Master Prc 263 | 5453990 proteasom      | 10                   | 2  | 14 | 2  | 1 | 249 | 28.7 | 6.02  | Not Found | High      | High      | High      | High      | High      |           |          | 1610027  | 2017222  | 11333078 | 3985831  | 6722078  | 18.81   | 2     | 119 | 2   |   |
| FALSE | Master Prc 191 | 22214432d myosin reg   | 12                   | 2  | 15 | 2  | 1 | 172 | 19.8 | 4.84  | High      | High      | High      | High      | High      | High      | 11346495  | 11291541 | 12489775 | 16041184 | 16558556 | 22487289 | 18.6     | 2       | 221   | 2   |     |   |
| FALSE | Master Prc 191 | 53042479j PREDICTED    | 12                   | 2  | 15 | 2  | 1 | 177 | 20.4 | 4.75  | High      | High      | High      | High      | High      | High      | 11346495  | 11291541 | 12489775 | 16041184 | 16558556 | 22487289 | 18.6     | 2       | 221   | 2   |     |   |
| FALSE | Master Prc 191 | 5453740 myosin reg     | 12                   | 2  | 15 | 2  | 1 | 171 | 19.8 | 4.81  | High      | High      | High      | High      | High      | High      | 11346495  | 11291541 | 12489775 | 16041184 | 16558556 | 22487289 | 18.6     | 2       | 221   | 2   |     |   |
| FALSE | Master Prc 49  | 4504517 heat shock     | 16                   | 2  | 15 | 2  | 1 | 205 | 22.8 | 6.4   | High      | High      | High      | High      | Not Found | Not Found | 12687206  | 11477469 | 11097990 |          |          | 22317508 | 18.56    | 1       | 165   | 2   |     |   |
| FALSE | Master Prc 211 | 9951915 adenosylc      | 6                    | 2  | 14 | 2  | 1 | 432 | 47.7 | 6.34  | High      | High      | High      | High      | High      | High      | 6124881   | 7499405  | 8079690  | 8532945  | 9479469  | 13712092 | 18.46    | 1       | 219   | 2   |     |   |
| FALSE | Master Prc 211 | 53041791c PREDICTED    | 7                    | 2  | 14 | 2  | 1 | 404 | 44.6 | 6.47  | High      | High      | High      | High      | High      | High      | 6124881   | 7499405  | 8079690  | 8532945  | 9479469  | 13712092 | 18.46    | 1       | 219   | 2   |     |   |
| FALSE | Master Prc 189 | 57881786j PREDICTED    | 11                   | 1  | 12 | 1  | 1 | 115 | 13.1 | 8.07  | High      | High      | High      | High      | High      | High      | 95585722  | 88112418 | 82493801 | 1.54E+08 | 1.69E+08 | 1.56E+08 | 17.95    | 1       | 226   | 1   |     |   |
| FALSE | Master Prc 189 | 50592994 thioredoxi    | 12                   | 1  | 12 | 1  | 1 | 105 | 11.7 | 4.92  | High      | High      | High      | High      | High      | High      | 95585722  | 88112418 | 82493801 | 1.54E+08 | 1.69E+08 | 1.56E+08 | 17.95    | 1       | 226   | 1   |     |   |
| FALSE | Master Prc 189 | 34973225c thioredoxi   | 15                   | 1  | 12 | 1  | 1 | 85  | 9.4  | 6.04  | High      | High      | High      | High      | High      | High      | 95585722  | 88112418 | 82493801 | 1.54E+08 | 1.69E+08 | 1.56E+08 | 17.95    | 1       | 226   | 1   |     |   |
| FALSE | Master Prc 3   | 21956645 mytrophil     | 14                   | 1  | 8  | 1  | 1 | 118 | 12.9 | 5.52  | High      | High      | High      | High      | Not Found | Not Found | 12012945  | 11038182 | 12029478 |          |          | 15380108 | 17.8     | 1       | 207   | 1   |     |   |
| FALSE | None           | 101                    | 53891994d malate deh | 11 | 2  | 16 | 2 | 1   | 231  | 24.6  | 7.99      | High      | High      | Not Found | High      | High      | 4635493   | 4833517  |          |          | 30370817 | 22495394 | 25172310 | 17.74   | 2     | 39  | 2   |   |
| FALSE | Master Prc 225 | 4505011 lysyl oxidase  | 3                    | 2  | 19 | 2  | 1 | 774 | 86.7 | 6.38  | High      | High      | High      | Not Found | High      | Not Found | 5515459   | 8538473  | 9063143  |          |          | 9019231  | 17.69    | 2       | 121   | 2   |     |   |
| FALSE | Master Prc 92  | 57883338d PREDICTED    | 6                    | 3  | 14 | 3  | 1 | 536 | 60.4 | 4.45  | High      | High      | High      | High      | Not Found | Not Found | 7039991   | 9181461  | 8541413  |          |          |          | 17.65    | 3       | 166   | 3   |     |   |
| FALSE | Master Prc 92  | 57428008c glucosidase  | 6                    | 3  | 14 | 3  | 1 | 525 | 59.1 | 4.42  | High      | High      | High      | Not Found | Not Found | Not Found | 7039991   | 9181461  | 8541413  |          |          |          | 17.65    | 3       | 166   | 3   |     |   |
| FALSE | Master Prc 92  | 48255889 glucosidase   | 6                    | 3  | 14 | 3  | 1 | 528 | 59.4 | 4.41  | High      | High      | High      | Not Found | Not Found | Not Found | 7039991   | 9181461  | 8541413  |          |          |          | 17.65    | 3       | 166   | 3   |     |   |
| FALSE | Master Prc 92  | 57883338d PREDICTED    | 6                    | 3  | 14 | 3  | 1 | 543 | 61.2 | 4.46  | High      | High      | High      | Not Found | Not Found | Not Found | 7039991   | 9181461  | 8541413  |          |          |          | 17.65    | 3       | 166   | 3   |     |   |
| FALSE | Master Prc 92  | 57428023c glucosidase  | 6                    | 3  | 14 | 3  | 1 | 535 | 60.2 | 4.41  | High      | High      | High      | Not Found | Not Found | Not Found | 7039991   | 9181461  | 8541413  |          |          |          | 17.65    | 3       | 166   | 3   |     |   |
| FALSE | Master Prc 92  | 57883339c PREDICTED    | 6                    | 3  | 14 | 3  | 1 | 533 | 60.1 | 4.46  | High      | High      | High      | Not Found | Not Found | Not Found | 7039991   | 9181461  | 8541413  |          |          |          | 17.65    | 3       | 166   | 3   |     |   |
| FALSE | Master Prc 236 | 55529016f aspartate a  | 9                    | 3  | 18 | 3  | 1 | 387 | 43   | 9.29  | Not Found | High      | Not Found | High      | High      | High      |           |          | 6005632  |          | 25897188 | 24932412 | 26622857 | 17.54   | 3     | 124 | 3   |   |
| FALSE | Master Prc 236 | 73486658 aspartate a   | 8                    | 3  | 18 | 3  | 1 | 430 | 47.5 | 9.01  | Not Found | High      | Not Found | High      | High      | High      |           |          | 6005632  |          | 25897188 | 24932412 | 26622857 | 17.54   | 3     | 124 | 3   |   |
| FALSE | None           | 68                     | 15325206c RNA-bindir | 4  | 1  | 11 | 1 | 1   | 392  | 42.8  | 10.32     | High      | High      | High      | High      | High      | 8960092   | 8528657  | 8596346  | 27292395 | 21789301 | 29286310 | 17.54    | 1       | 150   | 1   |     |   |
| FALSE | None           | 68                     | 22389021c RNA-bindir | 1  | 1  | 11 | 1 | 1   | 1067 | 114.9 | 9.1       | High      | High      | High      | High      | High      | 8960092   | 8528657  | 8596346  | 27292395 | 21789301 | 29286310 | 17.54    | 1       | 150   | 1   |     |   |
| FALSE | None           | 180,186                | 53038103j PREDICTED  | 7  | 1  | 14 | 0 | 2   | 251  | 26.3  | 6.79      | Not Found |           |          |          |          |          |          |          | 17.51   | 1     | 234 | 1   |   |
| FALSE | None           | 180,186                | 53038102j PREDICTED  | 6  | 1  | 14 | 0 | 2   | 271  | 28.5  | 6.64      | Not Found |           |          |          |          |          |          |          |         |       |     |     |   |

|       |                |          |             |                |    |    |    |   |      |       |       |           |           |           |           |           |           |           |          |          |          |          |          |          |          |          |       |     |     |   |
|-------|----------------|----------|-------------|----------------|----|----|----|---|------|-------|-------|-----------|-----------|-----------|-----------|-----------|-----------|-----------|----------|----------|----------|----------|----------|----------|----------|----------|-------|-----|-----|---|
| FALSE | Master Prc 161 | 7669503  | lysosome-d  | 5              | 2  | 17 | 2  | 1 | 410  | 44.9  | 5.69  | High      | 4791960  | 4125814  | 9392596  | 6656276  | 8548075  | 16.92    | 2        | 134      | 2     |     |     |   |
| FALSE | Master Prc 161 | 16979083 | lysosome-d  | 5              | 2  | 17 | 2  | 1 | 411  | 45.1  | 5.91  | High      | 4791960  | 4125814  | 9392596  | 6656276  | 8548075  | 16.92    | 2        | 134      | 2     |     |     |   |
| FALSE | Master Prc 161 | 4504957  | lysosome-d  | 5              | 2  | 17 | 2  | 1 | 410  | 44.9  | 5.63  | High      | 4791960  | 4125814  | 9392596  | 6656276  | 8548075  | 16.92    | 2        | 134      | 2     |     |     |   |
| FALSE | None           | 152      | 4507353     | TATA-bind      | 4  | 2  | 12 | 2 | 1    | 589   | 61.5  | 8.02      | High      | High      | High      | High      | High      | High      | 7874221  | 11435326 | 10015085 | 17123280 | 16862840 | 18871356 | 16.38    | 2        | 137   | 2   |     |   |
| FALSE | None           | 152      | 21327701    | TATA-bind      | 4  | 2  | 12 | 2 | 1    | 592   | 61.8  | 8.02      | High      | High      | High      | High      | High      | High      | 7874221  | 11435326 | 10015085 | 17123280 | 16862840 | 18871356 | 16.38    | 2        | 137   | 2   |     |   |
| FALSE | Master Prc 171 | 21361657 | protein dis | 4              | 2  | 15 | 2  | 1 | 505  | 56.7  | 6.35  | High      |          |          | 3154553  | 9312282  | 7643153  | 8445556  | 16.16    | 2        | 117   | 2   |     |   |
| FALSE | Master Prc 179 | 88853069 | vitronectin | 3              | 1  | 13 | 1  | 1 | 478  | 54.3  | 5.8   | High      | Not Found | High      | High      | High      | High      | High      |          |          | 4290591  | 14247036 | 12959866 | 13086296 | 16.01    | 1        | 98    | 1   |     |   |
| FALSE | Master Prc 115 | 53036814 | PREDICTED   | 4              | 1  | 12 | 1  | 1 | 348  | 38.5  | 6.19  | High      | Not Found | High      | High      | High      | High      | High      | 3341963  |          |          | 17655896 | 14474402 | 11128199 | 15.82    | 1        | 225   | 1   |     |   |
| FALSE | Master Prc 115 | 37150212 | macrophag   | 4              | 1  | 12 | 1  | 1 | 333  | 36.8  | 7.2   | High      | Not Found | High      | High      | High      | High      | High      | 3341963  |          |          | 17655896 | 14474402 | 11128199 | 15.82    | 1        | 225   | 1   |     |   |
| FALSE | None           | 77:106   | 19611529    | glial fibrilla | 3  | 1  | 13 | 0 | 2    | 431   | 49.5  | 6.13      | Not Found |          |          |          |          |          |          | 15.32    | 1        | 177   | 1   |     |   |
| FALSE | None           | 77:106   | 12562863    | keratin, tyr   | 2  | 1  | 13 | 0 | 2    | 452   | 50.5  | 5.67      | Not Found |          |          |          |          |          |          | 15.32    | 1        | 177   | 1   |     |   |
| FALSE | None           | 77:106   | 33199995    | keratin, tyr   | 2  | 1  | 13 | 0 | 2    | 520   | 56.1  | 6.61      | Not Found |          |          |          |          |          |          | 15.32    | 1        | 177   | 1   |     |   |
| FALSE | None           | 77:106   | 12562863    | keratin, tyr   | 2  | 1  | 13 | 0 | 2    | 422   | 47.2  | 5.3       | Not Found |          |          |          |          |          |          | 15.32    | 1        | 177   | 1   |     |   |
| FALSE | None           | 77:106   | 53039982    | PREDICTED      | 3  | 1  | 13 | 0 | 2    | 550   | 60.8  | 5.68      | Not Found |          |          |          |          |          |          | 15.32    | 1        | 177   | 1   |     |   |
| FALSE | None           | 77:106   | 53039982    | PREDICTED      | 2  | 1  | 13 | 0 | 2    | 487   | 54.2  | 5.33      | Not Found |          |          |          |          |          |          | 15.32    | 1        | 177   | 1   |     |   |
| FALSE | None           | 77:106   | 4503979     | glial fibrilla | 3  | 1  | 13 | 0 | 2    | 432   | 49.9  | 5.52      | Not Found |          |          |          |          |          |          | 15.32    | 1        | 177   | 1   |     |   |
| FALSE | None           | 77:106   | 34688844    | glial fibrilla | 3  | 1  | 13 | 0 | 2    | 438   | 50.3  | 5.67      | Not Found |          |          |          |          |          |          | 15.32    | 1        | 177   | 1   |     |   |
| FALSE | None           | 77:106   | 6778235     | keratin, tyr   | 2  | 1  | 13 | 0 | 2    | 469   | 51.4  | 5.48      | Not Found |          |          |          |          |          |          | 15.32    | 1        | 177   | 1   |     |   |
| FALSE | Master Prc 206 | 14110420 | heterogen   | 4              | 1  | 11 | 1  | 1 | 355  | 38.4  | 7.81  | High      |          |          |          |          |          |          | 15.16    | 1        | 167   | 1   |     |   |
| FALSE | Master Prc 206 | 51477708 | heterogen   | 5              | 1  | 11 | 1  | 1 | 287  | 30.7  | 8.41  | High      | 26323066 | 30636727 | 27914875 | 59240800 | 65192411 | 62152225 | 15.16    | 1        | 167   | 1   |     |   |
| FALSE | Master Prc 206 | 14110417 | heterogen   | 4              | 1  | 11 | 1  | 1 | 336  | 36.2  | 8.1   | High      | 26323066 | 30636727 | 27914875 | 59240800 | 65192411 | 62152225 | 15.16    | 1        | 167   | 1   |     |   |
| FALSE | Master Prc 206 | 14110414 | heterogen   | 5              | 1  | 11 | 1  | 1 | 306  | 32.8  | 8.16  | High      | 26323066 | 30636727 | 27914875 | 59240800 | 65192411 | 62152225 | 15.16    | 1        | 167   | 1   |     |   |
| FALSE | Master Prc 141 | 53041365 | PREDICTED   | 11             | 2  | 13 | 2  | 1 | 224  | 25    | 8.76  | High      | High      | High      | High      | High      | Not Found | Not Found | 7164527  | 10694582 | 8636158  | 32979429 |          |          | 15.15    | 2        | 184   | 2   |     |   |
| FALSE | Master Prc 141 | 68303561 | proteasom   | 10             | 2  | 13 | 2  | 1 | 256  | 28.5  | 8.98  | High      | High      | High      | High      | High      | Not Found | Not Found | 7164527  | 10694582 | 8636158  | 32979429 |          |          | 15.15    | 2        | 184   | 2   |     |   |
| FALSE | Master Prc 141 | 68303563 | proteasom   | 10             | 2  | 13 | 2  | 1 | 250  | 27.8  | 8.98  | High      | High      | High      | High      | High      | Not Found | Not Found | 7164527  | 10694582 | 8636158  | 32979429 |          |          | 15.15    | 2        | 184   | 2   |     |   |
| FALSE | Master Prc 141 | 4506189  | proteasom   | 10             | 2  | 13 | 2  | 1 | 248  | 27.9  | 8.46  | High      | High      | High      | High      | High      | Not Found | Not Found | 7164527  | 10694582 | 8636158  | 32979429 |          |          | 15.15    | 2        | 184   | 2   |     |   |
| FALSE | Master Prc 141 | 68303565 | proteasom   | 12             | 2  | 13 | 2  | 1 | 212  | 23.7  | 9.11  | High      | High      | High      | High      | High      | Not Found | Not Found | 7164527  | 10694582 | 8636158  | 32979429 |          |          | 15.15    | 2        | 184   | 2   |     |   |
| FALSE | Master Prc 282 | 11128019 | cytochrom   | 18             | 2  | 15 | 2  | 1 | 105  | 11.7  | 9.57  | High      | Not Found | High      | High      | High      | High      | High      | 11302067 | 11525180 |          | 39740845 | 40143717 | 41719636 | 15.11    | 2        | 82    | 2   |     |   |
| FALSE | Master Prc 134 | 22800840 | heterogen   | 2              | 1  | 13 | 1  | 1 | 562  | 62.6  | 7.56  | High      | Not Found | High      | High      | High      | High      | High      |          |          |          | 6194014  | 16747728 | 12238391 | 15472241 | 14.99    | 1     | 87  | 1   |   |
| FALSE | Master Prc 134 | 22800839 | heterogen   | 3              | 1  | 13 | 1  | 1 | 464  | 52    | 9.16  | High      | Not Found | High      | High      | High      | High      | High      | 4384381  |          |          | 6194014  | 16747728 | 12238391 | 15472241 | 14.99    | 1     | 87  | 1   |   |
| FALSE | Master Prc 134 | 22800829 | heterogen   | 2              | 1  | 13 | 1  | 1 | 623  | 69.6  | 8.59  | High      | Not Found | High      | High      | High      | High      | High      | 4384381  |          |          | 6194014  | 16747728 | 12238391 | 15472241 | 14.99    | 1     | 87  | 1   |   |
| FALSE | Master Prc 134 | 53038296 | PREDICTED   | 2              | 1  | 13 | 1  | 1 | 561  | 62.5  | 7.56  | High      | Not Found | High      | High      | High      | High      | High      | 4384381  |          |          | 6194014  | 16747728 | 12238391 | 15472241 | 14.99    | 1     | 87  | 1   |   |
| FALSE | Master Prc 134 | 22800829 | heterogen   | 2              | 1  | 13 | 1  | 1 | 588  | 65.6  | 8.6   | High      | Not Found | High      | High      | High      | High      | High      | 4384381  |          |          | 6194014  | 16747728 | 12238391 | 15472241 | 14.99    | 1     | 87  | 1   |   |
| FALSE | Master Prc 134 | 35938899 | heterogen   | 3              | 1  | 13 | 1  | 1 | 410  | 46.3  | 8.88  | High      | Not Found | High      | High      | High      | High      | High      | 4384381  |          |          | 6194014  | 16747728 | 12238391 | 15472241 | 14.99    | 1     | 87  | 1   |   |
| FALSE | Master Prc 134 | 53038297 | PREDICTED   | 2              | 1  | 13 | 1  | 1 | 525  | 59    | 9.36  | High      | Not Found | High      | High      | High      | High      | High      | 4384381  |          |          | 6194014  | 16747728 | 12238391 | 15472241 | 14.99    | 1     | 87  | 1   |   |
| FALSE | Master Prc 134 | 22800839 | heterogen   | 2              | 1  | 13 | 1  | 1 | 527  | 58.7  | 7.56  | High      | Not Found | High      | High      | High      | High      | High      | 4384381  |          |          | 6194014  | 16747728 | 12238391 | 15472241 | 14.99    | 1     | 87  | 1   |   |
| FALSE | Master Prc 223 | 5453710  | LIM and SH  | 5              | 1  | 12 | 1  | 1 | 261  | 29.7  | 7.05  | High      | 23150603 | 22838585 | 20501021 | 23073011 | 21877002 | 22011284 | 14.93    | 1        | 133   | 1   |     |   |
| FALSE | Master Prc 223 | 41044437 | LIM and SH  | 6              | 1  | 12 | 1  | 1 | 205  | 23.2  | 4.94  | High      | 23150603 | 22838585 | 20501021 | 23073011 | 21877002 | 22011284 | 14.93    | 1        | 133   | 1   |     |   |
| FALSE | Master Prc 197 | 53040232 | PREDICTED   | 9              | 2  | 19 | 2  | 1 | 158  | 18.3  | 9.7   | High      |          |          |          | 9021840  | 8044202  | 14282800 | 60469510 | 1.12E+08 | 14.7  | 2   | 69  | 2 |
| FALSE | Master Prc 197 | 53040231 | PREDICTED   | 7              | 2  | 19 | 2  | 1 | 215  | 24.9  | 5.74  | High      |          |          |          | 9021840  | 8044202  | 14282800 | 60469510 | 1.12E+08 | 14.7  | 2   | 69  | 2 |
| FALSE | None           | 42       | 57882173    | PREDICTED      | 3  | 15 | 3  | 1 | 3489 | 368.2 | 6.58  | High      | High      | High      | High      | High      | High      | Not Found | 5227071  | 5972002  | 6055745  | 15370859 | 41716251 |          | 14.49    | 3        | 90    | 3   |     |   |
| FALSE | None           | 42       | 57882173    | PREDICTED      | 4  | 15 | 3  | 1 | 4001 | 423.5 | 6.34  | High      | High      | High      | High      | High      | High      | Not Found | 5227071  | 5972002  | 6055745  | 15370859 | 41716251 |          | 14.49    | 3        | 90    | 3   |     |   |
| FALSE | None           | 42       | 53039729    | PREDICTED      | 4  | 3  | 15 | 3 | 1    | 4506  | 478.7 | 6.28      | High      | High      | High      | High      | High      | Not Found | 5227071  | 5972002  | 6055745  | 15370859 | 41716251 |          | 14.49    | 3        | 90    | 3   |     |   |
| FALSE | None           | 30       | 53038711    | PREDICTED      | 17 | 2  | 10 | 2 | 1    | 159   | 18.5  | 10.1      | Not Found | Not Found | Not Found | High      | High      | High      |          |          |          | 15690446 | 22378893 | 18504975 | 14.43    | 2        | 188   | 2   |     |   |
| FALSE | Master Prc 258 | 24431933 | reticulon-4 | 9              | 2  | 13 | 2  | 1 | 373  | 40.3  | 4.78  | High      | High      | High      | High      | High      | Not Found | Not Found | 9824606  | 13017258 | 15548356 | 15389797 | 51767382 |          | 14.34    | 2        | 180   | 2   |     |   |
| FALSE | Master Prc 258 | 24431935 | reticulon-4 | 3              | 2  | 13 | 2  | 1 | 1192 | 129.9 | 4.5   | High      | High      | High      | High      | High      | Not Found | Not Found | 9824606  | 13017258 | 15548356 | 15389797 | 51767382 |          | 14.34    | 2        | 180   | 2   |     |   |
| FALSE | Master Prc 258 | 47519490 | reticulon-4 | 9              | 2  | 13 | 2  | 1 | 392  | 42.2  | 4.74  | High      | High      | High      | High      | High      | Not Found | Not Found | 9824606  | 13017258 | 15548356 | 15389797 | 51767382 |          | 14.34    | 2        | 180   | 2   |     |   |
| FALSE | None           | 12       | 4557797     | nucleoside     | 19 | 2  | 14 | 2 | 1    | 152   | 17.1  | 6.19      | High      | High      | High      | High      | High      | High      | 14898776 | 19778806 | 23332452 | 65128401 | 70317858 | 63751186 | 14.34    | 2        | 43    | 2   |     |   |
| FALSE | None           | 12       | 38045913    | nucleoside     | 16 | 2  | 14 | 2 | 1    | 177   | 19.6  | 5.58      | High      | High      | High      | High      | High      | High      | 14898776 | 19778806 | 23332452 | 65128401 | 70317858 | 63751186 | 14.34    | 2        | 43    | 2   |     |   |
| FALSE | Master Prc 193 | 4507521  | transketola | 3              | 1  | 8  | 1  | 1 | 623  | 67.8  | 7.66  | Not Found | High      | High      | Not Found | High      | High      | High      |          |          |          | 7484845  |          | 25756629 | 23592617 | 14.23    | 1     | 142 | 1   |   |
| FALSE | Master Prc 193 | 38475523 | transketola | 3              | 1  | 8  | 1  | 1 | 631  | 68.8  | 7.52  | Not Found | High      | High      | Not Found | High      | High      | High      |          |          |          | 7484845  |          | 25756629 | 23592617 | 14.23    | 1     | 142 | 1   |   |
| FALSE | Master Prc 193 | 57880653 | PREDICTED   | 3              | 1  | 8  | 1  | 1 | 630  | 68.8  | 7.88  | Not Found | High      | High      | Not Found | High      | High      | High      |          |          |          | 7484845  |          | 25756629 | 23592617 | 14.23    | 1     | 142 | 1   |   |
| FALSE | Master Prc 174 | 38372925 | basigin iso | 11             | 2  | 13 | 2  | 1 | 269  | 29.2  | 5.64  | Not Found | High      | High      | High      | High      | High      | High      |          |          |          | 10741873 | 10856660 | 37836984 | 37038616 | 34879876 | 14.16 | 2   | 139 | 2 |
| FALSE | Master Prc 67  | 4506193  | proteas     |                |    |    |    |   |      |       |       |           |           |           |           |           |           |           |          |          |          |          |          |          |          |          |       |     |     |   |



|       |               |           |             |            |   |    |   |   |      |       |       |           |           |           |           |           |           |  |  |  |          |          |          |          |          |          |         |          |      |   |    |   |
|-------|---------------|-----------|-------------|------------|---|----|---|---|------|-------|-------|-----------|-----------|-----------|-----------|-----------|-----------|--|--|--|----------|----------|----------|----------|----------|----------|---------|----------|------|---|----|---|
| FALSE | Master Prc41  | 6005942   | transitona  | 2          | 1 | 8  | 1 | 1 | 806  | 89.3  | 5.26  | Not Found | Not Found | Not Found | High      | High      | High      |  |  |  | 3265652  | 4645965  |          | 12.14    | 1        | 110      | 1       |          |      |   |    |   |
| FALSE | Master Prc58  | 7524346   | adenylate l | 6          | 1 | 8  | 1 | 1 | 232  | 25.6  | 7.88  | High      | High      | Not Found | High      | Not Found | High      |  |  |  | 4363366  | 4491233  |          | 8373538  | 9462180  | 12.04    | 1       | 95       | 1    |   |    |   |
| FALSE | Master Prc58  | 4502013   | adenylate l | 5          | 1 | 8  | 1 | 1 | 239  | 26.5  | 7.81  | High      | High      | Not Found | High      | Not Found | High      |  |  |  | 4363366  | 4491233  |          | 8373538  | 9462180  | 12.04    | 1       | 95       | 1    |   |    |   |
| FALSE | Master Prc58  | 31283680c | adenylate l | 6          | 1 | 8  | 1 | 1 | 224  | 24.6  | 6.7   | High      | High      | Not Found | High      | Not Found | High      |  |  |  | 4363366  | 4491233  |          | 8373538  | 9462180  | 12.04    | 1       | 95       | 1    |   |    |   |
| FALSE | Master Prc21  | 34740329  | heterogeni  | 3          | 1 | 8  | 1 | 1 | 378  | 39.6  | 9.01  | High      | High      | High      | Not Found | Not Found | Not Found |  |  |  | 6111656  | 6133900  | 6388223  |          |          | 11.87    | 1       | 161      | 1    |   |    |   |
| FALSE | Master Prc21  | 53036999a | PREDICTED   | 3          | 1 | 8  | 1 | 1 | 341  | 35.9  | 8.95  | High      | High      | High      | Not Found | Not Found | Not Found |  |  |  | 6111656  | 6133900  | 6388223  |          |          | 11.87    | 1       | 161      | 1    |   |    |   |
| FALSE | Master Prc21  | 57880391f | PREDICTED   | 3          | 1 | 8  | 1 | 1 | 331  | 35.4  | 9.17  | High      | High      | High      | Not Found | Not Found | Not Found |  |  |  | 6111656  | 6133900  | 6388223  |          |          | 11.87    | 1       | 161      | 1    |   |    |   |
| FALSE | Master Prc21  | 53036999c | PREDICTED   | 3          | 1 | 8  | 1 | 1 | 356  | 37    | 8.31  | High      | High      | High      | Not Found | Not Found | Not Found |  |  |  | 6111656  | 6133900  | 6388223  |          |          | 11.87    | 1       | 161      | 1    |   |    |   |
| FALSE | Master Prc36  | 578800054 | PREDICTED   | 3          | 1 | 6  | 1 | 1 | 643  | 67.4  | 7.61  | Not Found | Not Found | Not Found | High      | High      | High      |  |  |  |          |          |          | 8157305  | 8256693  | 9619025  | 11.67   | 1        | 230  | 1 |    |   |
| FALSE | Master Prc36  | 578800052 | PREDICTED   | 3          | 1 | 6  | 1 | 1 | 664  | 69.7  | 7.36  | Not Found | Not Found | Not Found | High      | High      | High      |  |  |  |          |          |          | 8157305  | 8256693  | 9619025  | 11.67   | 1        | 230  | 1 |    |   |
| FALSE | Master Prc36  | 17402900  | far upstrea | 3          | 1 | 6  | 1 | 1 | 644  | 67.5  | 7.61  | Not Found | Not Found | Not Found | High      | High      | High      |  |  |  |          |          |          | 8157305  | 8256693  | 9619025  | 11.67   | 1        | 230  | 1 |    |   |
| FALSE | Master Prc36  | 53036354e | PREDICTED   | 3          | 1 | 6  | 1 | 1 | 665  | 69.8  | 7.36  | Not Found | Not Found | Not Found | High      | High      | High      |  |  |  |          |          |          | 8157305  | 8256693  | 9619025  | 11.67   | 1        | 230  | 1 |    |   |
| FALSE | Master Prc74  | 34419635  | heat shock  | 6          | 3 | 13 | 1 | 1 | 643  | 71    | 6.14  | Not Found | Not Found | Not Found | Not Found | High      | High      |  |  |  |          |          |          |          |          | 4589697  | 11.48   | 2        | 132  | 3 |    |   |
| FALSE | Master Prc203 | 124494254 | proliferac  | 7          | 2 | 8  | 2 | 1 | 394  | 43.8  | 6.55  | High      | High      | Not Found | High      | High      | High      |  |  |  | 5802805  |          |          | 24028974 | 23275332 | 26156341 | 10.95   | 2        | 54   | 2 |    |   |
| FALSE | Master Prc97  | 20070125  | protein dis | 8          | 3 | 8  | 3 | 1 | 508  | 57.1  | 4.87  | Not Found | Not Found | High      | High      | High      | High      |  |  |  |          | 9257326  | 9740563  | 7350423  | 21029337 | 10.89    | 3       | 94       | 2    |   |    |   |
| FALSE | Master Prc8   | 4504347   | hemoglobi   | 11         | 1 | 10 | 1 | 1 | 142  | 15.2  | 8.68  | High      | High      | Not Found | High      | High      | High      |  |  |  | 3065627  | 5109548  |          | 15728400 | 13969701 | 16948979 | 10.71   | 1        | 0    | 1 |    |   |
| FALSE | Master Prc84  | 4757826   | beta-2-mic  | 11         | 1 | 8  | 1 | 1 | 119  | 13.7  | 6.52  | High      | High      | Not Found | Not Found | Not Found | High      |  |  |  |          | 22051158 | 17684746 |          |          |          | 10.7    | 1        | 53   | 1 |    |   |
| FALSE | Master Prc84  | 530406194 | PREDICTED   | 11         | 1 | 8  | 1 | 1 | 122  | 14    | 7.44  | High      | High      | High      | Not Found | Not Found | Not Found |  |  |  | 14160385 | 22051158 | 17684746 |          |          | 10.7     | 1       | 53       | 1    |   |    |   |
| FALSE | Master Prc128 | 16723441f | thyroid hor | 2          | 2 | 9  | 2 | 1 | 955  | 108.6 | 10.15 | High      | High      | High      | Not Found | Not Found | Not Found |  |  |  | 8431291  | 6942093  |          |          |          | 10.49    | 2       | 79       | 2    |   |    |   |
| FALSE | Master Prc239 | 21624607  | coactosin f | 11         | 1 | 8  | 1 | 1 | 142  | 15.9  | 5.67  | Not Found | High      | High      | High      | Not Found | High      |  |  |  |          | 1642429  | 1607710  | 2493980  |          | 1982573  | 10.48   | 1        | 112  | 1 |    |   |
| FALSE | Master Prc23  | 28954752e | rab11 fami  | 1          | 1 | 9  | 1 | 1 | 649  | 70.9  | 9.31  | High      | High      | High      | Not Found | High      | High      |  |  |  | 25441358 | 32097110 |          | 49509038 | 54236594 | 46661956 | 10.45   | 1        | 0    | 1 |    |   |
| FALSE | Master Prc23  | 28954752d | rab11 fami  | 1          | 1 | 9  | 1 | 1 | 1283 | 137.1 | 5.43  | High      | High      | Not Found | High      | High      | High      |  |  |  | 25441358 | 32097110 |          | 49509038 | 54236594 | 46661956 | 10.45   | 1        | 0    | 1 |    |   |
| FALSE | Master Prc88  | 45935371  | serglycin p | 8          | 1 | 6  | 1 | 1 | 158  | 17.6  | 4.96  | High      | High      | Not Found | Not Found | Not Found | Not Found |  |  |  | 5417234  | 5356656  | 5209297  |          |          | 9.99     | 1       | 68       | 1    |   |    |   |
| FALSE | None          | 207       | 5453549     | peroxiredo | 3 | 1  | 7 | 1 | 271  | 30.5  | 6.29  | High      | Not Found | Not Found | High      | High      | High      |  |  |  |          |          |          |          |          | 1.1E+08  | 1.1E+08 | 1.16E+08 | 9.97 | 1 | 49 | 1 |
| FALSE | None          | 207       | 53042094e   | PREDICTED  | 3 | 1  | 7 | 1 | 257  | 29.3  | 5.69  | High      | Not Found | Not Found | High      | High      | High      |  |  |  |          |          |          |          |          | 1.1E+08  | 1.1E+08 | 1.16E+08 | 9.97 | 1 | 49 | 1 |
| FALSE | Master Prc    | 24233252j | uncharacte  | 0          | 1 | 8  | 0 | 0 | 3197 | 361.5 | 6.99  | Not Found |  |  |  |          |          |          |          |          |          | 9.97    | 1        | 65   | 1 |    |   |
| FALSE | Master Prc    | 53037890c | PREDICTED   | 0          | 1 | 8  | 0 | 0 | 3250 | 367.2 | 6.92  | Not Found |  |  |  |          |          |          |          |          |          | 9.97    | 1        | 65   | 1 |    |   |
| FALSE | Master Prc    | 53037890a | PREDICTED   | 0          | 1 | 8  | 0 | 0 | 3251 | 367.3 | 6.92  | Not Found |  |  |  |          |          |          |          |          |          | 9.97    | 1        | 65   | 1 |    |   |
| FALSE | Master Prc    | 530378914 | PREDICTED   | 0          | 1 | 8  | 0 | 0 | 3208 | 362.5 | 6.93  | Not Found |  |  |  |          |          |          |          |          |          | 9.97    | 1        | 65   | 1 |    |   |
| FALSE | Master Prc    | 53037890e | PREDICTED   | 0          | 1 | 8  | 0 | 0 | 3250 | 367.2 | 6.93  | Not Found |  |  |  |          |          |          |          |          |          | 9.97    | 1        | 65   | 1 |    |   |
| FALSE | Master Prc    | 57880996e | PREDICTED   | 0          | 1 | 8  | 0 | 0 | 2792 | 316   | 6.95  | Not Found |  |  |  |          |          |          |          |          |          | 9.97    | 1        | 65   | 1 |    |   |
| FALSE | Master Prc    | 530378912 | PREDICTED   | 0          | 1 | 8  | 0 | 0 | 3214 | 363.4 | 6.93  | Not Found |  |  |  |          |          |          |          |          |          | 9.97    | 1        | 65   | 1 |    |   |
| FALSE | Master Prc20  | 4506597   | 60S riboso  | 10         | 1 | 8  | 1 | 1 | 165  | 17.8  | 9.42  | High      | High      | High      | Not Found | Not Found | Not Found |  |  |  | 4972729  | 4133519  | 4304492  |          |          | 9.9      | 1       | 79       | 1    |   |    |   |
| FALSE | Master Prc147 | 6679625   | chymotryp   | 6          | 1 | 7  | 1 | 1 | 270  | 29.2  | 6.28  | Not Found | Not Found | Not Found | High      | High      | High      |  |  |  |          |          |          | 2410712  | 1518087  |          | 9.86    | 1        | 135  | 1 |    |   |
| FALSE | Master Prc147 | 23646005c | chymotryp   | 6          | 1 | 7  | 1 | 1 | 270  | 29.5  | 6.9   | Not Found | Not Found | Not Found | High      | High      | High      |  |  |  |          |          |          | 2410712  | 1518087  |          | 9.86    | 1        | 135  | 1 |    |   |
| FALSE | Master Prc22  | 9845502   | 40S riboso  | 6          | 1 | 6  | 1 | 1 | 295  | 32.8  | 4.87  | High      | High      | Not Found | Not Found | Not Found | Not Found |  |  |  | 8119726  | 7476526  |          |          |          | 9.75     | 1       | 89       | 1    |   |    |   |
| FALSE | Master Prc153 | 21254955f | interleukin | 3          | 2 | 11 | 2 | 1 | 706  | 76.5  | 7.91  | Not Found | Not Found | Not Found | High      | High      | High      |  |  |  |          |          |          | 16068125 | 15780785 | 14630310 | 9.66    | 2        | 79   | 2 |    |   |
| FALSE | Master Prc153 | 24234753  | interleukin | 3          | 2 | 11 | 2 | 1 | 702  | 76    | 7.75  | Not Found | Not Found | Not Found | High      | High      | High      |  |  |  |          |          |          | 16068125 | 15780785 | 14630310 | 9.66    | 2        | 79   | 2 |    |   |
| FALSE | Master Prc153 | 21254955g | interleukin | 2          | 2 | 11 | 2 | 1 | 898  | 95.7  | 8.81  | Not Found | Not Found | Not Found | High      | High      | High      |  |  |  |          |          |          | 16068125 | 15780785 | 14630310 | 9.66    | 2        | 79   | 2 |    |   |
| FALSE | Master Prc153 | 57883323j | PREDICTED   | 2          | 2 | 11 | 2 | 1 | 855  | 91.9  | 8.78  | Not Found | Not Found | Not Found | High      | High      | High      |  |  |  |          |          |          | 16068125 | 15780785 | 14630310 | 9.66    | 2        | 79   | 2 |    |   |
| FALSE | Master Prc153 | 24234750  | interleukin | 2          | 2 | 11 | 2 | 1 | 894  | 95.3  | 8.76  | Not Found | Not Found | Not Found | High      | High      | High      |  |  |  |          |          |          | 16068125 | 15780785 | 14630310 | 9.66    | 2        | 79   | 2 |    |   |
| FALSE | Master Prc153 | 24234756  | interleukin | 3          | 2 | 11 | 2 | 1 | 690  | 74.6  | 8.24  | Not Found | Not Found | Not Found | High      | High      | High      |  |  |  |          |          |          | 16068125 | 15780785 | 14630310 | 9.66    | 2        | 79   | 2 |    |   |
| FALSE | Master Prc91  | 5031877   | lamin-B1 f  | 4          | 2 | 8  | 2 | 1 | 586  | 66.4  | 5.16  | High      | High      | High      | Not Found | Not Found | Not Found |  |  |  | 8841341  | 6766444  | 9651441  |          |          | 9.63     | 2       | 52       | 2    |   |    |   |
| FALSE | Master Prc251 | 57880608e | PREDICTED   | 1          | 2 | 10 | 2 | 1 | 2320 | 248.2 | 6.25  | High      | High      | High      | Not Found | Not Found | High      |  |  |  | 10310347 | 9685947  | 9678741  |          |          | 20479115 | 9.36    | 2        | 122  | 2 |    |   |
| FALSE | Master Prc251 | 578806117 | PREDICTED   | 3          | 2 | 10 | 2 | 1 | 1135 | 119.9 | 5.24  | High      | High      | High      | Not Found | Not Found | High      |  |  |  | 10310347 | 9685947  | 9678741  |          |          | 20479115 | 9.36    | 2        | 122  | 2 |    |   |
| FALSE | Master Prc251 | 57880609d | PREDICTED   | 1          | 2 | 10 | 2 | 1 | 2311 | 247.4 | 6.43  | High      | High      | High      | Not Found | Not Found | High      |  |  |  | 10310347 | 9685947  | 9678741  |          |          | 20479115 | 9.36    | 2        | 122  | 2 |    |   |
| FALSE | Master Prc251 | 57880606f | PREDICTED   | 1          | 2 | 10 | 2 | 1 | 2352 | 251.5 | 6.32  | High      | High      | High      | Not Found | Not Found | High      |  |  |  | 10310347 | 9685947  | 9678741  |          |          | 20479115 | 9.36    | 2        | 122  | 2 |    |   |
| FALSE | Master Prc251 | 578806111 | PREDICTED   | 3          | 2 | 10 | 2 | 1 | 1207 | 127.2 | 5.57  | High      | High      | High      | Not Found | Not Found | High      |  |  |  | 10310347 | 9685947  | 9678741  |          |          | 20479115 | 9.36    | 2        | 122  | 2 |    |   |
| FALSE | Master Prc251 | 578806122 | PREDICTED   | 4          | 2 | 10 | 2 | 1 | 865  | 91.4  | 8.72  | High      | High      | High      | Not Found | Not Found | High      |  |  |  | 10310347 | 9685947  | 9678741  |          |          | 20479115 | 9.36    | 2        | 122  | 2 |    |   |
| FALSE | Master Prc251 | 578806113 | PREDICTED   | 3          | 2 | 10 | 2 | 1 | 1178 | 124.2 | 5.53  | High      | High      | High      | Not Found | Not Found | High      |  |  |  | 10310347 | 9685947  | 9678741  |          |          | 20479115 | 9.36    | 2        | 122  | 2 |    |   |
| FALSE | Master Prc251 | 57880609a | PREDICTED   | 1          | 2 | 10 | 2 | 1 | 2309 | 246.4 | 6.21  | High      | High      | High      | Not Found | Not Found | High      |  |  |  | 10310347 | 9685947  | 9678741  |          |          | 20479115 | 9.36    | 2        | 122  | 2 |    |   |
| FALSE | Master Prc251 | 578806104 | PREDICTED   | 1          | 2 | 10 | 2 | 1 | 2280 | 244.3 | 5.95  | High      | High      | High      | Not Found | Not Found | High      |  |  |  | 10310347 | 9685947  | 9678741  |          |          | 20479115 | 9.36    | 2        | 122  | 2 |    |   |
| FALSE | Master Prc251 | 530372482 | PREDICTED   | 2          | 2 | 10 | 2 | 1 | 2256 | 241.1 | 6.34  | High      | High      | High      | Not Found | Not Found | High      |  |  |  | 10310347 | 9685947  | 9678741  |          |          | 20479115 | 9.36    | 2        | 122  | 2 |    |   |
| FALSE | Master Prc251 | 57880609e | PREDICTED   | 1          | 2 | 10 | 2 | 1 | 2300 | 246.4 | 6.35  | High      | High      | High      | Not Found | Not Found | High      |  |  |  | 10310347 | 9685947  | 9678741  |          |          | 20479115 | 9.36    | 2        | 122  | 2 |    |   |
| FALSE | Master Prc251 | 530372504 | PREDICTED   | 4          | 2 | 10 | 2 | 1 | 906  | 95.4  |       |           |           |           |           |           |           |  |  |  |          |          |          |          |          |          |         |          |      |   |    |   |

|       |                |            |             |              |    |    |    |   |     |      |       |           |           |           |           |           |           |           |          |          |          |          |          |          |          |          |      |     |     |   |
|-------|----------------|------------|-------------|--------------|----|----|----|---|-----|------|-------|-----------|-----------|-----------|-----------|-----------|-----------|-----------|----------|----------|----------|----------|----------|----------|----------|----------|------|-----|-----|---|
| FALSE | Master Prc 142 | 74136883   | heterogen   | 3            | 2  | 9  | 2  | 1 | 825 | 90.5 | 6     | High      | Not Found | High      | High      | High      | Not Found | 11308846  | 11087012 | 35517259 | 67167451 |          |          |          |          | 9.19     | 2    | 34  | 2   |   |
| FALSE | None           | 37         | 29737478    | rho GDP-di   | 10 | 1  | 10 | 1 | 160 | 18.2 | 5.19  | High      | High      | High      | High      | Not Found | Not Found | 13817810  | 26572531 | 44112055 |          |          |          |          |          | 8.96     | 1    | 107 | 1   |   |
| FALSE | Master Prc 81  | 11968182   | 40S riboso  | 5            | 1  | 12 | 1  | 1 | 152 | 17.7 | 10.99 | High      | Not Found | High      | High      | High      | High      | 3246030   | 2936472  |          | 6556644  | 4845285  |          |          | 8.88     | 1        | 0    | 1   |     |   |
| FALSE | Master Prc 155 | 532691774  | proteasom   | 6            | 1  | 6  | 1  | 1 | 227 | 25.3 | 7.11  | High      | High      | High      | Not Found | Not Found | Not Found | 6968732   | 7075259  | 6901721  |          |          |          |          | 8.78     | 1        | 144  | 1   |     |   |
| FALSE | Master Prc 155 | 23110944   | proteasom   | 5            | 1  | 6  | 1  | 1 | 246 | 27.4 | 6.76  | High      | High      | High      | Not Found | Not Found | Not Found | 6968732   | 7075259  | 6901721  |          |          |          |          | 8.78     | 1        | 144  | 1   |     |   |
| FALSE | Master Prc 99  | 6031162    | calretinin  | 6            | 1  | 6  | 1  | 1 | 192 | 22.1 | 5.03  | Not Found | Not Found | Not Found | High      | High      | High      |           |          |          | 18246564 | 17266119 | 19234949 |          | 8.77     | 1        | 94   | 1   |     |   |
| FALSE | Master Prc 99  | 153946405  | calretinin  | 4            | 1  | 6  | 1  | 1 | 271 | 31.5 | 5.15  | Not Found | Not Found | Not Found | High      | High      | High      |           |          |          | 18246564 | 17266119 | 19234949 |          | 8.77     | 1        | 94   | 1   |     |   |
| FALSE | None           | 4          | 386869506   | 40S riboso   | 11 | 1  | 6  | 1 | 1   | 117  | 12.6  | 9.28      | Not Found | Not Found | Not Found | High      | High      | High      |          |          |          | 18343687 | 19215909 | 19243019 |          | 8.58     | 1    | 44  | 1   |   |
| FALSE | None           | 202        | 4505303     | myosin lig   | 6  | 1  | 6  | 1 | 1   | 208  | 22.8  | 5.73      | High      | High      | High      | Not Found | Not Found | Not Found | 15394781 | 18226079 | 16599444 |          |          |          |          | 8.05     | 1    | 86  | 1   |   |
| FALSE | Master Prc 202 | 8899583    | myosin lig  | 19           | 2  | 8  | 2  | 1 | 151 | 17   | 4.55  | High      | High      | High      | Not Found | Not Found | Not Found | 15394781  | 18226079 | 9127350  |          |          |          |          | 8.05     | 2        | 86   | 2   |     |   |
| FALSE | Master Prc 202 | 17986258   | myosin lig  | 19           | 2  | 8  | 2  | 1 | 151 | 16.9 | 4.65  | High      | High      | High      | Not Found | Not Found | Not Found | 15394781  | 18226079 | 9127350  |          |          |          |          | 8.05     | 2        | 86   | 2   |     |   |
| FALSE | Master Prc 247 | 4506407    | ran-specifi | 5            | 1  | 6  | 1  | 1 | 201 | 23.3 | 5.29  | High      | High      | High      | High      | Not Found | Not Found | Not Found | 7924757  | 8700707  | 7931065  |          |          |          |          | 7.96     | 1    | 86  | 1   |   |
| FALSE | Master Prc 247 | 520975484  | ran-specifi | 6            | 1  | 6  | 1  | 1 | 200 | 23.2 | 5.29  | High      | High      | High      | High      | Not Found | Not Found | Not Found | 7924757  | 8700707  | 7931065  |          |          |          |          | 7.96     | 1    | 86  | 1   |   |
| FALSE | Master Prc 247 | 520975477  | ran-specifi | 4            | 1  | 6  | 1  | 1 | 278 | 31.9 | 8.75  | High      | High      | High      | High      | Not Found | Not Found | Not Found | 7924757  | 8700707  | 7931065  |          |          |          |          | 7.96     | 1    | 86  | 1   |   |
| FALSE | Master Prc 247 | 578837318  | PREDICTED   | 4            | 1  | 6  | 1  | 1 | 271 | 30.9 | 6.68  | High      | High      | High      | High      | Not Found | Not Found | Not Found | 7924757  | 8700707  | 7931065  |          |          |          |          | 7.96     | 1    | 86  | 1   |   |
| FALSE | Master Prc 118 | 21703710   | protein shi | 3            | 1  | 7  | 1  | 1 | 240 | 25.6 | 6.68  | High      | High      | High      | High      | Not Found | Not Found | High      | 19463245 | 21259330 | 19905268 |          |          | 10497222 |          | 7.94     | 1    | 33  | 1   |   |
| FALSE | Master Prc 118 | 441418791  | protein shi | 3            | 1  | 7  | 1  | 1 | 209 | 22.4 | 6.25  | High      | High      | High      | High      | Not Found | Not Found | High      | 19463245 | 21259330 | 19905268 |          |          | 10497222 |          | 7.94     | 1    | 33  | 1   |   |
| FALSE | Master Prc 256 | 7706573    | 45 kDa calc | 7            | 2  | 11 | 2  | 1 | 348 | 39.6 | 5.11  | High      | High      | High      | High      | Not Found | Not Found | High      | 6187551  | 14554114 | 15990038 |          |          | 16082529 |          | 7.94     | 2    | 58  | 2   |   |
| FALSE | Master Prc 256 | 18699732   | 45 kDa calc | 7            | 2  | 11 | 2  | 1 | 362 | 41.8 | 4.86  | High      | High      | High      | High      | Not Found | Not Found | High      | 6187551  | 14554114 | 15990038 |          |          | 16082529 |          | 7.94     | 2    | 58  | 2   |   |
| FALSE | Master Prc 18  | 4759212    | tubulin-spe | 14           | 1  | 1  | 1  | 1 | 108 | 12.8 | 5.29  | High      | High      | High      | High      | Not Found | Not Found | Not Found | 8829213  | 14906622 | 11857405 |          |          |          |          | 7.69     | 1    | 20  | 1   |   |
| FALSE | Master Prc 131 | 4504151    | granulin p  | 5            | 2  | 9  | 2  | 1 | 593 | 63.5 | 6.83  | High      | High      | High      | High      | Not Found | High      | High      | 5457852  | 5157394  | 5365240  |          |          | 28404173 |          | 7.66     | 2    | 55  | 2   |   |
| FALSE | None           | 74         | 16746617    | heat shock   | 5  | 2  | 9  | 1 | 1   | 641  | 70    | 5.66      | Not Found | High      |          |          |          |          |          | 4589697  |          | 7.6      | 1    | 130 | 2   |   |
| FALSE | None           | 127        | 578800142   | PREDICTED    | 0  | 1  | 6  | 1 | 1   | 1945 | 220.7 | 5.58      | Not Found | Not Found | Not Found | High      | High      | High      |          |          |          | 70121749 | 68715386 | 78653189 |          | 7.56     | 1    | 55  | 1   |   |
| FALSE | None           | 127        | 578800146   | PREDICTED    | 0  | 1  | 6  | 1 | 1   | 1737 | 196.6 | 5.57      | Not Found | Not Found | Not Found | High      | High      | High      |          |          |          | 70121749 | 68715386 | 78653189 |          | 7.56     | 1    | 55  | 1   |   |
| FALSE | None           | 127        | 578800144   | PREDICTED    | 0  | 1  | 6  | 1 | 1   | 1918 | 217   | 5.6       | Not Found | Not Found | Not Found | High      | High      | High      |          |          |          | 70121749 | 68715386 | 78653189 |          | 7.56     | 1    | 55  | 1   |   |
| FALSE | None           | 127        | 57880014C   | PREDICTED    | 0  | 1  | 6  | 1 | 1   | 1972 | 223.3 | 5.62      | Not Found | Not Found | Not Found | High      | High      | High      |          |          |          | 70121749 | 68715386 | 78653189 |          | 7.56     | 1    | 55  | 1   |   |
| FALSE | None           | 127        | 153791497   | rootletin [P | 0  | 1  | 6  | 1 | 1   | 2017 | 228.4 | 5.5       | Not Found | Not Found | Not Found | High      | High      | High      |          |          |          | 70121749 | 68715386 | 78653189 |          | 7.56     | 1    | 55  | 1   |   |
| FALSE | None           | 127        | 578800138   | PREDICTED    | 0  | 1  | 6  | 1 | 1   | 1979 | 224.1 | 5.59      | Not Found | Not Found | Not Found | High      | High      | High      |          |          |          | 70121749 | 68715386 | 78653189 |          | 7.56     | 1    | 55  | 1   |   |
| FALSE | None           | 175        | 57882036C   | PREDICTED    | 3  | 1  | 6  | 1 | 1   | 332  | 36.5  | 6.99      | Not Found | Not Found | Not Found | High      | High      | High      |          |          |          | 32195992 | 25332939 | 24393717 |          | 7.53     | 1    | 50  | 1   |   |
| FALSE | None           | 175        | 57882035E   | PREDICTED    | 3  | 1  | 6  | 1 | 1   | 356  | 39.1  | 7.44      | Not Found | Not Found | Not Found | High      | High      | High      |          |          |          | 32195992 | 25332939 | 24393717 |          | 7.53     | 1    | 50  | 1   |   |
| FALSE | Master Prc 212 | 568599832  | cystatin-C  | 11           | 1  | 4  | 1  | 1 | 146 | 15.8 | 8.75  | High      | High      | High      | Not Found | Not Found | Not Found | Not Found | 5744756  | 7079170  |          |          |          |          | 7.48     | 1        | 113  | 1   |     |   |
| FALSE | Master Prc 278 | 11559923   | eukaryotic  | 5            | 1  | 6  | 1  | 1 | 248 | 27.4 | 7.23  | High      | High      | High      | Not Found | Not Found | Not Found | 7326127   | 8663418  |          |          |          |          |          | 7.47     | 1        | 132  | 1   |     |   |
| FALSE | Master Prc 278 | 14702180   | eukaryotic  | 6            | 1  | 6  | 1  | 1 | 228 | 25.2 | 8.09  | High      | High      | High      | Not Found | Not Found | Not Found | 7326127   | 8663418  |          |          |          |          |          | 7.47     | 1        | 132  | 1   |     |   |
| FALSE | None           | 182        | 11342830C   | PREDICTED    | 5  | 1  | 7  | 1 | 1   | 186  | 20.4  | 6.42      | Not Found | Not Found | High      | High      | High      | High      |          |          | 59846998 | 91897613 | 98763109 | 89609439 |          | 7.46     | 1    | 53  | 1   |   |
| FALSE | None           | 77         | 11970375    | keratin, ty  | 2  | 1  | 6  | 1 | 1   | 564  | 60    | 8         | High      | High      | High      | Not Found | Not Found | Not Found | 6489272  | 8331514  | 7425039  |          |          |          |          | 7.37     | 1    | 84  | 1   |   |
| FALSE | None           | 51         | 57882735E   | PREDICTED    | 6  | 1  | 6  | 1 | 1   | 161  | 18.7  | 4.78      | Not Found | Not Found | Not Found | High      | High      | High      |          |          |          | 14568511 | 14647778 | 14809722 |          | 7.36     | 1    | 0   | 1   |   |
| FALSE | Master Prc 181 | 31542331   | protein CY  | 3            | 1  | 14 | 1  | 1 | 381 | 42   | 8.21  | High      | 11286947 | 12482169 | 9634817  |          |          | 48163613 | 48955889 | 44941907 | 7.28 | 1   | 145 | 1 |
| FALSE | Master Prc 56  | 3223031274 | 40S riboso  | 8            | 2  | 6  | 2  | 1 | 165 | 18.9 | 10.15 | Not Found | High      | Not Found | Not Found | High      | High      | High      |          |          | 7915643  |          |          | 6293188  | 7143278  |          | 7.1  | 2   | 83  | 2 |
| FALSE | Master Prc 65  | 41327712   | adapter m   | 9            | 2  | 6  | 2  | 1 | 304 | 33.8 | 5.55  | High      | Not Found | High      | High      | Not Found | Not Found | Not Found | 3059477  |          | 3362491  | 2501547  |          |          |          |          | 7.1  | 2   | 99  | 2 |
| FALSE | Master Prc 65  | 41327710   | adapter m   | 14           | 2  | 6  | 2  | 1 | 204 | 22.9 | 5.48  | High      | Not Found | High      | High      | Not Found | Not Found | Not Found | 3059477  |          | 3362491  | 2501547  |          |          |          |          | 7.1  | 2   | 99  | 2 |
| FALSE | Master Prc 103 | 556695502  | small ubiq  | 9            | 1  | 6  | 1  | 1 | 141 | 15.8 | 6.92  | High      | High      | High      | Not Found | Not Found | Not Found | 3920194   | 9840005  | 7561139  |          |          |          |          | 7.06     | 1        | 68   | 1   |     |   |
| FALSE | Master Prc 103 | 54792071   | small ubiq  | 17           | 1  | 6  | 1  | 1 | 71  | 8.1  | 5.41  | High      | High      | High      | Not Found | Not Found | Not Found | 3920194   | 9840005  | 7561139  |          |          |          |          | 7.06     | 1        | 68   | 1   |     |   |
| FALSE | Master Prc 103 | 50400081   | small ubiq  | 13           | 1  | 6  | 1  | 1 | 95  | 10.6 | 7.18  | High      | High      | High      | Not Found | Not Found | Not Found | 3920194   | 9840005  | 7561139  |          |          |          |          | 7.06     | 1        | 68   | 1   |     |   |
| FALSE | Master Prc 103 | 48928058   | small ubiq  | 12           | 1  | 6  | 1  | 1 | 103 | 11.6 | 5.49  | High      | High      | High      | Not Found | Not Found | Not Found | 3920194   | 9840005  | 7561139  |          |          |          |          | 7.06     | 1        | 68   | 1   |     |   |
| FALSE | Master Prc 103 | 54792069   | small ubiq  | 13           | 1  | 6  | 1  | 1 | 95  | 10.9 | 5.5   | High      | High      | High      | Not Found | Not Found | Not Found | 3920194   | 9840005  | 7561139  |          |          |          |          | 7.06     | 1        | 68   | 1   |     |   |
| FALSE | Master Prc 168 | 4506661    | 60S riboso  | 4            | 1  | 6  | 1  | 1 | 266 | 30   | 10.61 | High      | High      | High      | Not Found | Not Found | Not Found | 6806851   | 6470088  | 7466381  |          |          |          |          | 6.81     | 1        | 34   | 1   |     |   |
| FALSE | Master Prc 267 | 13775198   | SH3 domai   | 16           | 1  | 4  | 1  | 1 | 93  | 10.4 | 4.93  | Not Found | Not Found | High      | Not Found | High      | High      |           |          |          | 9036431  |          |          | 11185543 |          | 6.8      | 1    | 86  | 1   |   |
| FALSE | Master Prc 230 | 67782307   | superoxide  | 13           | 2  | 8  | 2  | 1 | 222 | 24.7 | 8.25  | High      | Not Found | High      | High      | Not Found | High      | High      | 1274027  |          | 2407535  | 5642666  |          | 7572043  |          | 6.76     | 2    | 28  | 2   |   |
| FALSE | Master Prc 230 | 67782309   | superoxide  | 16           | 2  | 8  | 2  | 1 | 183 | 20.7 | 8.25  | High      | Not Found | High      | High      | Not Found | High      | High      | 1274027  |          | 2407535  | 5642666  |          | 7572043  |          | 6.76     | 2    | 28  | 2   |   |
| FALSE | Master Prc 93  | 57879495C  | PREDICTED   | 6            | 1  | 6  | 1  | 1 | 191 | 21   | 7.72  | High      | High      | High      | Not Found | Not Found | Not Found | 7007082   | 6299792  | 6854261  |          |          |          |          | 6.73     | 1        | 28   | 1   |     |   |
| FALSE | Master Prc 93  | 5802966    | destrin iso | 7            | 1  | 6  | 1  | 1 | 165 | 18.5 | 7.85  | High      | High      | High      | Not Found | Not Found | Not Found | 7007082   | 6299792  | 6854261  |          |          |          |          | 6.73     | 1        | 28   | 1   |     |   |
| FALSE | Master Prc 93  | 58530848   | destrin iso | 7            | 1  | 6  | 1  | 1 | 148 | 16.6 | 8.34  | High      | High      | High      | Not Found | Not Found | Not Found | 7007082   | 6299792  | 6854261  |          |          |          |          | 6.73     | 1        | 28   | 1   |     |   |
| FALSE | Master Prc 93  | 578843371  | PREDICTED   | 6            | 1  | 6  | 1  | 1 | 191 | 21.1 | 7.77  | High      | High      | High      | Not Found | Not Found | Not Found | 7007082   | 6299792  | 6854261  |          |          |          |          | 6.73     | 1        | 28   | 1   |     |   |
| FALSE | Master Prc 93  | 57880693E  | PREDICTED   | 6            | 1  | 6  | 1  | 1 | 178 | 19.5 | 7.12  | High      | High      | High      | Not Found | Not Found | Not Found | 7007082   | 6299792  | 6854261  |          |          |          |          | 6.73     | 1        | 28   | 1   |     |   |
| FALSE | Master Prc 255 | 32455262   | peroxiredo  | 14           | 1  | 4  | 1  | 1 | 125 | 12.8 | 9.14  | Not Found | Not Found | High      | Not Found | Not Found | Not Found |           |          |          | 1609110  |          |          |          | 6.71     | 1        | 67   | 1   |     |   |
| FALSE | Master Prc 255 |            |             |              |    |    |    |   |     |      |       |           |           |           |           |           |           |           |          |          |          |          |          |          |          |          |      |     |     |   |





|       |                |           |              |             |   |   |   |   |      |       |       |           |           |           |           |           |           |           |          |          |          |          |          |          |          |      |    |    |    |   |   |
|-------|----------------|-----------|--------------|-------------|---|---|---|---|------|-------|-------|-----------|-----------|-----------|-----------|-----------|-----------|-----------|----------|----------|----------|----------|----------|----------|----------|------|----|----|----|---|---|
| FALSE | Master Prc 234 | 21327708  | nucleosom    | 3           | 1 | 5 | 1 | 1 | 391  | 45.3  | 4.46  | Not Found | High      | High      | High      | Not Found | Not Found |           |          | 2504776  | 2552977  | 2199250  |          |          |          | 2.01 | 1  | 27 | 1  |   |   |
| FALSE | Master Prc 234 | 57882378  | PREDICTED    | 2           | 1 | 5 | 1 | 1 | 452  | 52.7  | 4.48  | Not Found | High      | High      | High      | Not Found | Not Found |           |          | 2504776  | 2552977  | 2199250  |          |          |          | 2.01 | 1  | 27 | 1  |   |   |
| FALSE | Master Prc 234 | 57882378  | PREDICTED    | 3           | 1 | 5 | 1 | 1 | 402  | 46.5  | 4.46  | Not Found | High      | High      | High      | Not Found | Not Found |           |          | 2504776  | 2552977  | 2199250  |          |          |          | 2.01 | 1  | 27 | 1  |   |   |
| FALSE | Master Prc 234 | 57882379  | PREDICTED    | 3           | 1 | 5 | 1 | 1 | 328  | 38.2  | 4.56  | Not Found | High      | High      | High      | Not Found | Not Found |           |          | 2504776  | 2552977  | 2199250  |          |          |          | 2.01 | 1  | 27 | 1  |   |   |
| FALSE | Master Prc 76  | 17136148  | V-type pro   | 4           | 1 | 2 | 1 | 1 | 470  | 52    | 6.14  | High      | Not Found |           | 858439.3 |          |          |          |          |          |          | 1.98 | 1  | 0  | 1  |   |   |
| FALSE | Master Prc 124 | 4506765   | protein S10  | 11          | 1 | 8 | 1 | 1 | 101  | 11.7  | 6.11  | Not Found | Not Found | Not Found | High      | High      | High      |           |          |          |          | 98357449 | 1.04E+08 | 98741134 | 1.98     | 1    | 0  | 1  |    |   |   |
| FALSE | None           | 47,240    | 42558279     | tubulin bet | 2 | 1 | 4 | 0 | 2    | 444   | 49.7  | 4.89      | Not Found |           |          |          |          |          |          |          |          | 1.96 | 1  | 35 | 1  |   |   |
| FALSE | None           | 47,240    | 13562114     | tubulin bet | 2 | 1 | 4 | 0 | 2    | 451   | 50.3  | 5.17      | Not Found |           |          |          |          |          |          |          |          | 1.96 | 1  | 35 | 1  |   |   |
| FALSE | Master Prc 166 | 4506623   | 60S riboso   | 7           | 1 | 3 | 1 | 1 | 136  | 15.8  | 10.56 | Not Found | Not Found | Not Found | Not Found | High      | High      |           |          |          |          |          | 18961332 | 18694449 | 1.93     | 1    | 28 | 1  |    |   |   |
| FALSE | Master Prc 227 | 24234688  | stress-70 p  | 2           | 1 | 2 | 1 | 1 | 679  | 73.6  | 6.16  | Not Found | Not Found | Not Found | High      | Not Found | Not Found |           |          |          |          | 5670576  |          |          | 1.91     | 1    | 33 | 1  |    |   |   |
| FALSE | Master Prc     | 57883613  | PREDICTED    | 1           | 1 | 2 | 0 | 0 | 720  | 82.6  | 5.9   | Not Found |           |          |          |          |          |          |          |          | 1.9  | 1  | 0  | 1  |   |   |
| FALSE | Master Prc 62  | 16445393  | cadherin-1   | 2           | 1 | 4 | 1 | 1 | 794  | 88.3  | 4.81  | High      | Not Found | High      | Not Found | Not Found | Not Found |           | 332678   |          | 46108495 |          |          |          |          | 1.86 | 1  | 0  | 1  |   |   |
| FALSE | Master Prc 109 | 4557831   | pterin-4-al  | 15          | 1 | 2 | 1 | 1 | 104  | 12    | 6.8   | Not Found | Not Found | Not Found | Not Found | High      |           |           |          |          |          |          |          | 1617438  | 1.72     | 1    | 0  | 1  |    |   |   |
| FALSE | None           | 27        | 48255943     | CD44 antig  | 6 | 1 | 4 | 1 | 1    | 139   | 15.6  | 8.48      | High      | High      | High      | Not Found | Not Found | Not Found |          | 11784062 | 33208191 | 37951081 |          |          |          | 1.61 | 1  | 42 | 1  |   |   |
| FALSE | Master Prc 164 | 4503507   | eukaryotic   | 3           | 1 | 5 | 1 | 1 | 472  | 51.1  | 8.4   | Not Found | Not Found | Not Found | High      | High      | High      |           |          |          |          | 10775904 | 11649959 | 11636440 | 0        | 1    | 63 | 1  |    |   |   |
| FALSE | Master Prc 69  | 160420317 | filamin-A is | 1           | 2 | 3 | 2 | 1 | 2647 | 280.6 | 6.06  | High      | Not Found | Not Found | Not Found | Not Found | High      |           | 1808669  |          |          |          |          | 10339430 | 0        | 0    | 1  | 0  | 2  |   |   |
| FALSE | None           | 257       | 197313672    | protein CD  | 4 | 1 | 4 | 1 | 1    | 213   | 22.1  | 5.81      | High      | High      | High      | Not Found | Not Found | Not Found |          | 20054934 | 24151460 | 19221679 |          |          |          | 0    | 1  | 0  | 1  |   |   |
| FALSE | Master Prc 69  | 116063573 | filamin-A is | 1           | 2 | 3 | 2 | 1 | 2639 | 279.8 | 6.05  | High      | Not Found | Not Found | Not Found | Not Found | High      |           | 1808669  |          |          |          |          | 10339430 | 0        | 1    | 0  | 0  | 2  |   |   |
| FALSE | None           | 257       | 530374901    | PREDICTED   | 4 | 1 | 4 | 1 | 1    | 210   | 21.7  | 5.54      | High      | High      | High      | Not Found | Not Found | Not Found |          | 20054934 | 24151460 | 19221679 |          |          |          | 0    | 1  | 0  | 1  |   |   |
| FALSE | Master Prc 249 | 530400234 | PREDICTED    | 5           | 1 | 3 | 1 | 1 | 295  | 32.5  | 5.62  | High      | High      | Not Found | High      | Not Found | Not Found | Not Found |          |          |          |          |          |          |          | 0    | 1  | 0  | 1  |   |   |
| FALSE | Master Prc 167 | 373432684 | ubiquitin-c  | 7           | 1 | 1 | 1 | 1 | 212  | 24    | 8.75  | Not Found | Not Found | Not Found | High      | Not Found | Not Found |           |          |          |          |          |          | 6048827  | 0        | 1    |    |    |    |   |   |
| FALSE | Master Prc 167 | 373432682 | ubiquitin-c  | 12          | 1 | 1 | 1 | 1 | 122  | 14.1  | 8.92  | Not Found | Not Found | Not Found | High      | Not Found | Not Found |           |          |          |          |          |          |          | 6048827  | 0    | 1  |    |    |   |   |
| FALSE | Master Prc 146 | 544063423 | stress-indu  | 3           | 1 | 2 | 1 | 1 | 590  | 68    | 7.74  | High      | Not Found | High      | Not Found | Not Found | Not Found |           | 1006880  |          | 1979874  |          |          |          |          | 0    | 1  |    |    |   |   |
| FALSE | Master Prc 146 | 5803181   | stress-indu  | 3           | 1 | 2 | 1 | 1 | 543  | 62.6  | 6.8   | High      | Not Found | High      | Not Found | Not Found | Not Found |           | 1006880  |          | 1979874  |          |          |          |          | 0    | 1  |    |    |   |   |
| FALSE | Master Prc 167 | 4507789   | ubiquitin-c  | 10          | 1 | 1 | 1 | 1 | 154  | 17.9  | 8.51  | Not Found | Not Found | Not Found | High      | Not Found | Not Found |           |          |          |          |          |          |          | 6048827  | 0    | 1  |    |    |   |   |
| FALSE | Master Prc 133 | 4506607   | 60S riboso   | 7           | 1 | 1 | 1 | 1 | 188  | 21.6  | 11.72 | Not Found | High      | Not Found | Not Found | Not Found | Not Found |           |          |          |          |          |          |          |          |      |    |    | 41 | 1 |   |
| FALSE | Master Prc 133 | 395132436 | 60S riboso   | 8           | 1 | 1 | 1 | 1 | 159  | 18.1  | 11.84 | Not Found | High      | Not Found | Not Found | Not Found | Not Found |           |          |          |          |          |          |          |          |      |    |    | 41 | 1 |   |
| FALSE | Master Prc 248 | 46367787  | polyadenyl   | 2           | 1 | 2 | 1 | 1 | 636  | 70.6  | 9.5   | Not Found | Not Found | Not Found | Not Found | High      | High      |           |          |          |          |          |          | 15398210 | 16255916 |      |    |    | 18 | 1 |   |
| FALSE | Master Prc 248 | 45238849  | polyadenyl   | 2           | 1 | 2 | 1 | 1 | 631  | 70    | 9.67  | Not Found | Not Found | Not Found | Not Found | High      | High      |           |          |          |          |          |          | 15398210 | 16255916 |      |    |    | 18 | 1 |   |
| FALSE | Master Prc 151 | 4758280   | ephrin type  | 1           | 1 | 3 | 1 | 1 | 986  | 109.8 | 6.61  | Not Found | High      | High      | Not Found | Not Found | Not Found |           | 9793539  |          | 9604328  |          |          |          |          |      |    |    | 0  | 1 |   |
| FALSE | Master Prc 117 | 6005956   | dual specif  | 5           | 1 | 1 | 1 | 1 | 340  | 37.7  | 6.84  | Not Found | Not Found | Not Found | Not Found | High      | Not Found |           |          |          |          |          |          | 11251093 |          |      |    |    | 0  | 1 |   |
| FALSE | Master Prc 151 | 53036997  | PREDICTED    | 1           | 1 | 3 | 1 | 1 | 949  | 105.6 | 6.19  | Not Found | High      | High      | Not Found | Not Found | Not Found |           | 9793539  |          | 9604328  |          |          |          |          |      |    |    |    | 0 | 1 |
| FALSE | Master Prc 192 | 12667788  | myosin-9 (   | 1           | 1 | 1 | 1 | 1 | 1960 | 226.4 | 5.6   | Not Found | High      |           |          |          |          |          |          |          | 4803428  |      |    |    | 0  | 1 |   |

Mascot



|       |                          |     |           |                                                                                    |    |    |     |    |   |     |      |      |           |           |           |           |           |           |           |         |          |          |          |          |          |        |   |      |   |  |  |  |  |  |
|-------|--------------------------|-----|-----------|------------------------------------------------------------------------------------|----|----|-----|----|---|-----|------|------|-----------|-----------|-----------|-----------|-----------|-----------|-----------|---------|----------|----------|----------|----------|----------|--------|---|------|---|--|--|--|--|--|
| FALSE | Master Protein           | 13  | 67782365  | keratin, type II cytoskeletal 7 (Homo sapiens)                                     | 22 | 9  | 172 | 8  | 1 | 469 | 51.4 | 5.48 | High      | 1.3E+08 | 1.54E+08 | 1.51E+08 | 2.44E+08 | 2.42E+08 | 2.41E+08 | 209.54 | 8 | 1858 | 9 |  |  |  |  |  |
| FALSE | None                     | 13  | 13012148  | 12526262 keratin, type II cytoskeletal 80 isoform K80.1 (Homo sapiens)             | 3  | 1  | 96  | 0  | 3 | 422 | 47.2 | 5.3  | Not Found |         |          |          |          |          |          |        |   |      |   |  |  |  |  |  |
| FALSE | None                     | 13  | 13012148  | 13462844 ggl fibrillary acidic protein isoform 3 (Homo sapiens)                    | 3  | 1  | 96  | 0  | 3 | 438 | 57.4 | 6.23 | Not Found |         |          |          |          |          |          |        |   |      |   |  |  |  |  |  |
| FALSE | None                     | 13  | 13012148  | 12526286 keratin, type II cytoskeletal 80 isoform K80 (Homo sapiens)               | 2  | 1  | 96  | 0  | 3 | 452 | 50.5 | 5.67 | Not Found |         |          |          |          |          |          |        |   |      |   |  |  |  |  |  |
| FALSE | None                     | 13  | 13012148  | 53039928 PREDICTED: keratin, type II cytoskeletal 80 isoform X1 (Homo sapiens)     | 2  | 1  | 96  | 0  | 3 | 552 | 60.8 | 5.68 | Not Found |         |          |          |          |          |          |        |   |      |   |  |  |  |  |  |
| FALSE | None                     | 13  | 13012148  | 4503979 ggl fibrillary acidic protein isoform 1 (Homo sapiens)                     | 3  | 1  | 96  | 0  | 3 | 421 | 49.9 | 6.13 | Not Found |         |          |          |          |          |          |        |   |      |   |  |  |  |  |  |
| FALSE | None                     | 13  | 13012148  | 15611230 ggl fibrillary acidic protein isoform 2 (Homo sapiens)                    | 3  | 1  | 96  | 0  | 3 | 430 | 49.5 | 6.51 | Not Found |         |          |          |          |          |          |        |   |      |   |  |  |  |  |  |
| FALSE | None                     | 13  | 13012148  | 33199954 keratin, type II cytoskeletal 4 (Homo sapiens)                            | 2  | 1  | 96  | 0  | 3 | 520 | 56.1 | 6.61 | Not Found |         |          |          |          |          |          |        |   |      |   |  |  |  |  |  |
| FALSE | None                     | 13  | 13012148  | 53039928 PREDICTED: keratin, type II cytoskeletal 80 isoform X2 (Homo sapiens)     | 2  | 1  | 96  | 0  | 3 | 487 | 54.2 | 6.33 | Not Found |         |          |          |          |          |          |        |   |      |   |  |  |  |  |  |
| FALSE | Master Protein Candidate | 130 | 53040159  | PREDICTED: polyadenylate-binding protein 4-like (Homo sapiens)                     | 1  | 1  | 1   | 1  | 1 | 169 | 17.1 | 8.79 | Not Found |         |          |          |          |          |          |        |   |      |   |  |  |  |  |  |
| FALSE | Master Protein Candidate | 130 | 208431836 | polyadenylate-binding protein 4 isoform 3 (Homo sapiens)                           | 3  | 1  | 2   | 1  | 1 | 631 | 69.5 | 6.31 | Not Found |         |          |          |          |          |          |        |   |      |   |  |  |  |  |  |
| FALSE | Master Protein           | 130 | 208431833 | polyadenylate-binding protein 4 isoform 1 (Homo sapiens)                           | 2  | 1  | 2   | 1  | 1 | 660 | 72.3 | 9.35 | Not Found |         |          |          |          |          |          |        |   |      |   |  |  |  |  |  |
| FALSE | Master Protein Candidate | 130 | 40404715  | polyadenylate-binding protein 4 isoform 2 (Homo sapiens)                           | 2  | 1  | 2   | 1  | 1 | 644 | 70.7 | 9.26 | Not Found |         |          |          |          |          |          |        |   |      |   |  |  |  |  |  |
| FALSE | Master Protein           | 131 | 57817383  | PREDICTED: gelsolin isoform X7 (Homo sapiens)                                      | 2  | 1  | 8   | 1  | 1 | 820 | 89.5 | 6.51 | Not Found |         |          |          |          |          |          |        |   |      |   |  |  |  |  |  |
| FALSE | Master Protein Candidate | 131 | 384475528 | gelsolin isoform 4 (Homo sapiens)                                                  | 2  | 1  | 8   | 1  | 1 | 748 | 82.5 | 5.63 | Not Found |         |          |          |          |          |          |        |   |      |   |  |  |  |  |  |
| FALSE | Master Protein Candidate | 131 | 530391018 | PREDICTED: gelsolin isoform X1 (Homo sapiens)                                      | 2  | 1  | 8   | 1  | 1 | 752 | 82.8 | 5.85 | High      | Not Found | Not Found | High      | High      | Not Found | Not Found |         |          |          |          |          |          |        |   |      |   |  |  |  |  |  |
| FALSE | Master Protein Candidate | 131 | 57817385  | PREDICTED: gelsolin isoform X8 (Homo sapiens)                                      | 2  | 1  | 8   | 1  | 1 | 742 | 81.9 | 5.85 | High      | Not Found | Not Found | High      | High      | Not Found | Not Found |         |          |          |          |          |          |        |   |      |   |  |  |  |  |  |
| FALSE | Master Protein Candidate | 131 | 189084776 | gelsolin isoform b (Homo sapiens)                                                  | 2  | 1  | 8   | 1  | 1 | 731 | 80.6 | 5.85 | High      | Not Found | Not Found | High      | High      | Not Found | Not Found |         |          |          |          |          |          |        |   |      |   |  |  |  |  |  |
| FALSE | Master Protein Candidate | 131 | 427918083 | gelsolin isoform e (Homo sapiens)                                                  | 2  | 1  | 8   | 1  | 1 | 739 | 81.4 | 5.85 | High      | Not Found | Not Found | High      | High      | Not Found | Not Found |         |          |          |          |          |          |        |   |      |   |  |  |  |  |  |
| FALSE | Master Protein Candidate | 131 | 4504165   | gelsolin isoform a precursor (Homo sapiens)                                        | 2  | 1  | 8   | 1  | 1 | 782 | 85.6 | 6.28 | High      | Not Found | Not Found | High      | High      | Not Found | Not Found |         |          |          |          |          |          |        |   |      |   |  |  |  |  |  |
| FALSE | Master Protein Candidate | 131 | 390517030 | gelsolin isoform 1 (Homo sapiens)                                                  | 2  | 1  | 8   | 1  | 1 | 707 | 84.7 | 5.83 | High      | Not Found | Not Found | High      | High      | Not Found | Not Found |         |          |          |          |          |          |        |   |      |   |  |  |  |  |  |
| FALSE | Master Protein           | 132 | 53039549  | PREDICTED: cathepin L1 isoform X1 (Homo sapiens)                                   | 8  | 2  | 15  | 2  | 1 | 323 | 37.5 | 5.45 | High      |         |          |          |          |          |          |        |   |      |   |  |  |  |  |  |
| FALSE | None                     | 133 | 9966687   | eukaryotic translation initiation factor 5A-2 (Homo sapiens)                       | 8  | 1  | 24  | 1  | 1 | 153 | 16.8 | 5.58 | High      |         |          |          |          |          |          |        |   |      |   |  |  |  |  |  |
| FALSE | Master Protein Candidate | 133 | 153791632 | eukaryotic translation initiation factor 5A-1-like (Homo sapiens)                  | 13 | 19 | 3   | 44 | 3 | 154 | 16.8 | 5.58 | High      |         |          |          |          |          |          |        |   |      |   |  |  |  |  |  |
| FALSE | Master Protein           | 133 | 123555707 | eukaryotic translation initiation factor 5A-1 isoform A (Homo sapiens)             | 16 | 3  | 44  | 3  | 1 | 184 | 20.2 | 7.01 | High      |         |          |          |          |          |          |        |   |      |   |  |  |  |  |  |
| FALSE | Master Protein Candidate | 133 | 53040036  | PREDICTED: eukaryotic translation initiation factor 5A-1 isoform X5 (Homo sapiens) | 19 | 3  | 44  | 3  | 1 | 154 | 16.8 | 5.24 | High      |         |          |          |          |          |          |        |   |      |   |  |  |  |  |  |
| FALSE | Master Protein           | 134 | 20070125  | protein disulfide-isomerase precursor (Homo sapiens)                               | 10 | 4  | 17  | 4  | 1 | 508 | 57.1 | 4.87 | High      |         |          |          |          |          |          |        |   |      |   |  |  |  |  |  |
| FALSE | None                     | 135 | 387912532 | serpin B7 isoform 2 (Homo sapiens)                                                 | 3  | 1  | 12  | 1  | 1 | 363 | 41.1 | 6.74 | High      |         |          |          |          |          |          |        |   |      |   |  |  |  |  |  |
| FALSE | None                     | 135 | 387912530 | serpin B7 isoform 1 (Homo sapiens)                                                 | 3  | 1  | 12  | 1  | 1 | 380 | 42.9 | 6.8  | High      |         |          |          |          |          |          |        |   |      |   |  |  |  |  |  |
| FALSE | Master Protein           | 135 | 12498119  | plasmagenin activator inhibitor 2 (Homo sapiens)                                   | 18 | 7  | 59  | 1  | 1 | 419 | 56.6 | 4.15 | Not Found |         |          |          |          |          |          |        |   |      |   |  |  |  |  |  |
| FALSE | Master Protein Candidate | 135 | 4502049   | aldo reductase (Homo sapiens)                                                      | 3  | 1  | 2   | 1  | 1 | 316 | 35.8 | 6.98 | Not Found |         |          |          |          |          |          |        |   |      |   |  |  |  |  |  |
| FALSE | Master Protein           | 136 | 320202986 | alcohol dehydrogenase (NADPH+) (Homo sapiens)                                      | 3  | 1  | 2   | 1  | 1 | 325 | 36.6 | 6.79 | Not Found |         |          |          |          |          |          |        |   |      |   |  |  |  |  |  |
| FALSE | None                     | 137 | 4525663   | uracilase-type pyriminase activator isoform 1 precursor (Homo sapiens)             | 1  | 1  | 1   | 1  | 1 | 431 | 48.5 | 8.41 | Not Found |         |          |          |          |          |          |        |   |      |   |  |  |  |  |  |
| FALSE | Master Protein Candidate | 137 | 322517750 | uracilase-type pyriminase activator isoform 2 (Homo sapiens)                       | 1  | 1  | 1   | 1  | 1 | 414 | 46.9 | 8.41 | Not Found |         |          |          |          |          |          |        |   |      |   |  |  |  |  |  |
| FALSE | Master Protein Candidate | 137 | 57819560  | PREDICTED: uracilase-type pyriminase activator isoform X1 (Homo sapiens)           | 3  | 1  | 6   | 1  | 1 | 375 | 42.4 | 8.29 | Not Found |         |          |          |          |          |          |        |   |      |   |  |  |  |  |  |
| FALSE | Master Protein           | 138 | 12408765  | prefoldin subunit 2 (Homo sapiens)                                                 | 9  | 1  | 6   | 1  | 1 | 154 | 16.6 | 6.58 | High      | Not Found |         |          |          |          |          |          |        |   |      |   |  |  |  |  |  |
| FALSE | None                     | 139 | 578812543 | PREDICTED: serpin B5 isoform X1 (Homo sapiens)                                     | 11 | 2  | 20  | 2  | 1 | 204 | 23.1 | 6.54 | High      |         |          |          |          |          |          |        |   |      |   |  |  |  |  |  |
| FALSE | Master Protein           | 139 | 18786126  | serpin B5 (Homo sapiens)                                                           | 11 | 2  | 20  | 2  | 1 | 408 | 44.9 | 8.65 | High      |         |          |          |          |          |          |        |   |      |   |  |  |  |  |  |
| FALSE | Master Protein           | 139 | 13775200  | splicing factor 3B subunit 1 (Homo sapiens)                                        | 15 | 1  | 6   | 1  | 1 | 86  | 10.1 | 6.35 | High      |         |          |          |          |          |          |        |   |      |   |  |  |  |  |  |
| FALSE | Master Protein Candidate | 140 | 66346681  | plasmagenin activator inhibitor 1 RNA-binding protein isoform 2 (Homo sapiens)     | 4  | 1  | 2   | 1  | 1 | 402 | 44.2 | 8.66 | High      | Not Found |         |          |          |          |          |          |        |   |      |   |  |  |  |  |  |
| FALSE | Master Protein Candidate | 140 | 66346679  | plasmagenin activator inhibitor 1 RNA-binding protein isoform 3 (Homo sapiens)     | 4  | 1  | 2   | 1  | 1 | 398 | 44.9 | 8.65 | High      | Not Found |         |          |          |          |          |          |        |   |      |   |  |  |  |  |  |
| FALSE | Master Protein Candidate | 140 | 66346685  | plasmagenin activator inhibitor 1 RNA-binding protein isoform 4 (Homo sapiens)     | 4  | 1  | 2   | 1  | 1 | 387 | 42.4 | 8.44 | High      | Not Found |         |          |          |          |          |          |        |   |      |   |  |  |  |  |  |
| FALSE | Master Protein Candidate | 140 | 66346683  | plasmagenin activator inhibitor 1 RNA-binding protein isoform 3 (Homo sapiens)     | 4  | 1  | 2   | 1  | 1 | 393 | 43.1 | 8.44 | High      | Not Found |         |          |          |          |          |          |        |   |      |   |  |  |  |  |  |
| FALSE | None                     | 141 | 538919948 | malate dehydrogenase, mitochondrial isoform 3 (Homo sapiens)                       | 26 | 4  | 37  | 4  | 1 | 231 | 24.6 | 7.99 | High      |         |          |          |          |          |          |        |   |      |   |  |  |  |  |  |
| FALSE | None                     | 141 | 538919941 | malate dehydrogenase, mitochondrial isoform 2 precursor (Homo sapiens)             | 26 | 4  | 37  | 4  | 1 | 231 | 24.6 | 7.99 | High      |         |          |          |          |          |          |        |   |      |   |  |  |  |  |  |
| FALSE | None                     | 141 | 538919985 | malate dehydrogenase, mitochondrial isoform 2 precursor (Homo sapiens)             | 20 | 4  | 53  | 4  | 1 | 296 | 30.9 | 8.43 | High      |         |          |          |          |          |          |        |   |      |   |  |  |  |  |  |
| FALSE | Master Protein Candidate | 141 | 20162550  | protein phosphatase 1 regulatory subunit 14B (Homo sapiens)                        | 9  | 1  | 22  | 1  | 1 | 147 | 15.9 | 4.88 | High      |         |          |          |          |          |          |        |   |      |   |  |  |  |  |  |
| FALSE | Master Protein           | 142 | 73393140  | LM domain kinase 2 iso                                                             |    |    |     |    |   |     |      |      |           |           |           |           |           |           |           |         |          |          |          |          |          |        |   |      |   |  |  |  |  |  |







|       |                          |     |           |                                                                                               |     |    |     |    |     |      |       |        |           |           |           |      |      |      |      |          |          |          |          |          |          |          |          |          |          |       |    |     |   |
|-------|--------------------------|-----|-----------|-----------------------------------------------------------------------------------------------|-----|----|-----|----|-----|------|-------|--------|-----------|-----------|-----------|------|------|------|------|----------|----------|----------|----------|----------|----------|----------|----------|----------|----------|-------|----|-----|---|
| FALSE | Master Protein Candidate | 210 | 530389856 | PREDICTED: beta-1,4-galactosyltransferase 1 isoform X1 [Homo sapiens]                         | 2   | 1  | 8   | 1  | 1   | 357  | 39.3  | 9.07   | High      | Not Found | High      | High | High | High | High | 27232928 | 29380419 | 55445253 | 58521550 | 60493811 | 8.61     | 1        | 38       | 1        |          |       |    |     |   |
| FALSE | Master Protein Candidate | 210 | 4375828   | beta-1,4-galactosyltransferase 5 [Homo sapiens]                                               | 2   | 1  | 8   | 1  | 1   | 388  | 45.1  | 8.13   | High      | Not Found | High      | High | High | High | High | 27232928 | 29380419 | 55445253 | 58521550 | 60493811 | 8.61     | 1        | 38       | 1        |          |       |    |     |   |
| FALSE | Master Protein Candidate | 211 | 4507189   | ubiquitin-conjugating enzyme E2 L3 isoform 1 [Homo sapiens]                                   | 10  | 1  | 2   | 1  | 1   | 156  | 17.9  | 8.51   | Not Found | Not Found | High      | High | High | High | High | 27232928 | 29380419 | 55445253 | 58521550 | 60493811 | 8.61     | 1        | 38       | 1        |          |       |    |     |   |
| FALSE | Master Protein Candidate | 211 | 373423882 | ubiquitin-conjugating enzyme E2 L3 isoform 3 [Homo sapiens]                                   | 12  | 1  | 2   | 1  | 1   | 122  | 14.1  | 8.92   | Not Found | Not Found | High      | High | High | High | High | 27232928 | 29380419 | 55445253 | 58521550 | 60493811 | 8.61     | 1        | 38       | 1        |          |       |    |     |   |
| FALSE | Master Protein           | 211 | 373432684 | ubiquitin-conjugating enzyme E2 L3 isoform 4 [Homo sapiens]                                   | 7   | 1  | 2   | 1  | 1   | 212  | 24    | 8.75   | Not Found | Not Found | High      | High | High | High | High | 27232928 | 29380419 | 55445253 | 58521550 | 60493811 | 8.61     | 1        | 38       | 1        |          |       |    |     |   |
| FALSE | Master Protein           | 212 | 4506661   | 60S ribosomal protein L7e [Homo sapiens]                                                      | 5   | 1  | 2   | 1  | 1   | 266  | 30    | 10.61  | Not Found | Not Found | High      | High | High | High | High | 27232928 | 29380419 | 55445253 | 58521550 | 60493811 | 8.61     | 1        | 38       | 1        |          |       |    |     |   |
| FALSE | Master Protein           | 213 | 4526868   | profilin-1 [Homo sapiens]                                                                     | 140 | 15 | 306 | 15 | 140 | 15   | 140   | 15     | 15        | 15        | 15        | 15   | 15   | 15   | 15   | 15       | 7.52E+08 | 7.67E+08 | 9.83E+08 | 1.1E+09  | 1.93E+09 | 1.63E+09 | 4588.4   | 4566.8   |          |       |    |     |   |
| FALSE | Master Protein           | 214 | 21361657  | protein disulfide-isomerase A3 precursor [Homo sapiens]                                       | 17  | 8  | 65  | 8  | 1   | 505  | 56.7  | 6.33   | High      | High      | High      | High | High | High | High | High     | 59876607 | 64870867 | 66478645 | 1.36E+08 | 1.48E+08 | 1.32E+08 | 75.86    | 8        | 308      | 8     |    |     |   |
| FALSE | Master Protein           | 215 | 4504323   | histone H4                                                                                    | 29  | 3  | 21  | 3  | 1   | 103  | 11.4  | 11.36  | High      | High      | High      | High | High | High | High | High     | 1.97E+08 | 1.27E+08 | 2.32E+08 | 2.58E+08 | 2.18E+08 | 1.72E+08 | 27491253 | 21.13    | 3        | 136   | 3  |     |   |
| FALSE | Master Protein           | 216 | 4503477   | elongation factor 1-beta [Homo sapiens]                                                       | 2   | 12 | 2   | 46 | 2   | 225  | 24.7  | 4.67   | High      | High      | High      | High | High | High | High | High     | 79364185 | 1.12E+08 | 1.05E+08 | 2.94E+08 | 3.05E+08 | 1.26E+08 | 36.36    | 2        | 312      | 2     |    |     |   |
| FALSE | Master Protein           | 217 | 14211889  | protein arginyl-30 homolog [Homo sapiens]                                                     | 1   | 1  | 1   | 1  | 1   | 916  | 112   | 4.88   | High      | High      | High      | High | High | High | High | High     | 1525683  |          |          |          |          |          | 827879   | 0        | 1        | 1     |    |     |   |
| FALSE | Master Protein           | 218 | 4826643   | annexin A3 [Homo sapiens]                                                                     | 29  | 8  | 81  | 8  | 1   | 323  | 36.4  | 5.92   | High      | High      | High      | High | High | High | High | High     | 71429063 | 73734111 | 68482604 | 1.22E+08 | 1.24E+08 | 1.26E+08 | 96.56    | 8        | 715      | 8     |    |     |   |
| FALSE | None                     | 219 | 15082234  | L-lactate dehydrogenase A-like 6B [Homo sapiens]                                              | 4   | 1  | 28  | 1  | 1   | 381  | 41.9  | 8.63   | High      | High      | High      | High | High | High | High | High     | 15997455 | 14950202 | 16258407 | 66176935 | 66015231 | 61129933 | 50.74    | 1        | 562      | 1     |    |     |   |
| FALSE | Master Protein Candidate | 219 | 26009972  | L-lactate dehydrogenase A chain isoform 2 [Homo sapiens]                                      | 17  | 5  | 57  | 1  | 1   | 361  | 39.8  | 8.45   | High      | High      | High      | High | High | High | High | High     | 29572333 | 46613606 | 44101415 | 98327309 | 98860731 | 1.26E+08 | 81.33    | 5        | 739      | 5     |    |     |   |
| FALSE | Master Protein           | 219 | 5001857   | L-lactate dehydrogenase A chain isoform 2 [Homo sapiens]                                      | 18  | 5  | 57  | 5  | 1   | 332  | 36.7  | 8.27   | High      | High      | High      | High | High | High | High | High     | 29572333 | 46613606 | 44101415 | 98327309 | 98860731 | 1.26E+08 | 84.33    | 5        | 739      | 5     |    |     |   |
| FALSE | None                     | 219 | 207028494 | L-lactate dehydrogenase A chain isoform 2 [Homo sapiens]                                      | 16  | 4  | 29  | 4  | 1   | 274  | 30.2  | 7.15   | High      | High      | High      | High | High | High | High | High     | 43147211 | 41950859 | 58022909 | 1.14E+08 | 1.12E+08 | 1.29E+08 | 33.59    | 4        | 205      | 4     |    |     |   |
| FALSE | None                     | 219 | 26009972  | L-lactate dehydrogenase A chain isoform 5 [Homo sapiens]                                      | 17  | 3  | 51  | 3  | 1   | 241  | 26.7  | 8.15   | High      | High      | High      | High | High | High | High | High     | 29572333 | 46613606 | 44101415 | 98327309 | 98860731 | 1E+08    | 76.95    | 3        | 736      | 3     |    |     |   |
| FALSE | Master Protein           | 219 | 26009972  | L-lactate dehydrogenase A chain isoform 5 [Homo sapiens]                                      | 15  | 3  | 51  | 3  | 1   | 274  | 30    | 8      | High      | High      | High      | High | High | High | High | High     | 29572333 | 46613606 | 44101415 | 98327309 | 98860731 | 1.26E+08 | 76.95    | 3        | 736      | 3     |    |     |   |
| FALSE | Master Protein           | 220 | 4759212   | tubulin-specific chaperone A [Homo sapiens]                                                   | 24  | 3  | 8   | 3  | 1   | 108  | 12.8  | 5.29   | Not Found | Not Found | Not Found | High | High | High | High | High     | 43147211 | 41950859 | 58022909 | 1.14E+08 | 1.12E+08 | 1.29E+08 | 33.59    | 4        | 205      | 4     |    |     |   |
| FALSE | None                     | 22  | 530379470 | PREDICTED: tubulin-specific chaperone A isoform X2 [Homo sapiens]                             | 9   | 2  | 4   | 2  | 1   | 129  | 15.8  | 9.35   | Not Found | Not Found | Not Found | High | High | High | High | High     | 54257377 | 47784805 |          |          |          | 4.66     | 4        | 24       | 2        |       |    |     |   |
| FALSE | Master Protein           | 220 | 149999611 | signal recognition particle 14 kDa protein [Homo sapiens]                                     | 10  | 1  | 2   | 1  | 1   | 136  | 14.6  | 10.04  | Not Found | Not Found | Not Found | High | High | High | High | High     | 31884450 |          |          |          |          |          | 3.77     | 1        | 40       | 1     |    |     |   |
| FALSE | Master Protein           | 220 | 4502491   | complexin 1 component 1, subcomponent-binding protein, mitochondrial precursor [Homo sapiens] | 5   | 2  | 1   | 1  | 1   | 282  | 21.3  | 4.84   | High      | High      | High      | High | High | High | High | High     | 27404585 | 27304655 | 29231611 | 4727602  |          |          | 18.53    | 1        | 27       | 1     |    |     |   |
| FALSE | Master Protein           | 220 | 530363142 | PREDICTED: splicing factor, proline- and glutamine-rich isoform X2 [Homo sapiens]             | 4   | 2  | 14  | 2  | 1   | 707  | 76.1  | 9.44   | Not Found | Not Found | Not Found | High | High | High | High | High     | 9376640  |          |          |          |          |          | 40408604 | 33893089 | 38614107 | 18.53 | 2  | 123 | 2 |
| FALSE | Master Protein Candidate | 220 | 530363150 | PREDICTED: splicing factor, proline- and glutamine-rich isoform X6 [Homo sapiens]             | 4   | 2  | 14  | 2  | 1   | 669  | 72.2  | 9.23   | Not Found | Not Found | Not Found | High | High | High | High | High     | 9376640  |          |          |          |          |          | 40408604 | 33893089 | 38614107 | 18.53 | 2  | 123 | 2 |
| FALSE | Master Protein           | 222 | 14245448  | thioredoxin domain-containing protein 17 [Homo sapiens]                                       | 20  | 2  | 26  | 2  | 1   | 123  | 13.9  | 5.52   | High      | High      | High      | High | High | High | High | High     | 3266449  |          |          |          |          |          | 8296184  | 48906105 | 8.6      | 2     | 32 | 2   |   |
| FALSE | Master Protein           | 224 | 4885165   | crystallin A [Homo sapiens]                                                                   | 12  | 1  | 4   | 1  | 1   | 98   | 11    | 5.5    | Not Found | Not Found | Not Found | High | High | High | High | High     | 23071441 | 2229878  |          |          |          |          | 4.68     | 1        | 28       | 1     |    |     |   |
| FALSE | Master Protein           | 225 | 13994151  | POZ and LIM domain protein 1 [Homo sapiens]                                                   | 3   | 1  | 6   | 1  | 1   | 329  | 36    | 7.02   | High      | High      | High      | High | High | High | High | High     | 39592005 | 43120626 | 40728779 |          |          |          | 5.95     | 1        | 38       | 1     |    |     |   |
| FALSE | Master Protein           | 226 | 4506641   | serine protease HTRA1 precursor [Homo sapiens]                                                | 2   | 1  | 4   | 1  | 1   | 480  | 51.3  | 7.83   | Not Found | Not Found | Not Found | High | High | High | High | High     | 43973206 |          |          |          |          |          | 5462860  | 49016067 | 7.17     | 1     | 84 | 1   |   |
| FALSE | Master Protein Candidate | 227 | 4506691   | 40S ribosomal protein S16 [Homo sapiens]                                                      | 8   | 1  | 6   | 1  | 1   | 146  | 16.4  | 10.21  | Not Found | Not Found | Not Found | High | High | High | High | High     | 24250002 | 22668068 | 26412806 |          |          |          | 8.17     | 1        | 135      | 1     |    |     |   |
| FALSE | Master Protein           | 228 | 53047300  | PREDICTED: 40S ribosomal protein S16 isoform X1 [Homo sapiens]                                | 1   | 1  | 1   | 1  | 1   | 352  | 37.1  | 13.29  | Not Found | Not Found | Not Found | High | High | High | High | High     | 24250002 | 22668068 | 26412806 |          |          |          | 8.17     | 1        | 135      | 1     |    |     |   |
| FALSE | Master Protein           | 228 | 578834659 | PREDICTED: kallikrein-10 isoform X5 [Homo sapiens]                                            | 9   | 2  | 11  | 2  | 1   | 276  | 30.2  | 8.59   | High      | High      | High      | High | High | High | High | High     | 55728081 | 6143078  | 5286600  |          |          |          | 2.50     | 2        | 36       | 2     |    |     |   |
| FALSE | Master Protein           | 229 | 110611218 | ribosome-binding protein 1 [Homo sapiens]                                                     | 2   | 1  | 6   | 1  | 1   | 977  | 106.6 | 5.54   | Not Found | Not Found | Not Found | High | High | High | High | High     |          |          |          |          |          | 25612003 | 2137985  | 2818964  | 6.23     | 1     | 35 | 1   |   |
| FALSE | Master Protein           | 229 | 15326822  | aldolase dehydrogenase family 1 member A13 [Homo sapiens]                                     | 1   | 1  | 1   | 1  | 1   | 512  | 56.1  | 7.25   | Not Found | Not Found | Not Found | High | High | High | High | High     |          |          |          |          |          |          |          |          |          |       |    |     |   |
| FALSE | Master Protein           | 230 | 53034850  | PREDICTED: peptidyl-prolyl cis-trans isomerase A isoform X1 [Homo sapiens]                    | 30  | 1  | 30  | 1  | 1   | 105  | 10.5  | 11.4   | Not Found | Not Found | Not Found | High | High | High | High | High     | 1.53E+08 | 1.32E+08 | 1.55E+08 | 1.56E+08 | 3.11E+08 | 1.52E+08 | 60.3     | 3        | 106      | 3     |    |     |   |
| FALSE | Master Protein           | 230 | 1086392   | peptidyl-prolyl cis-trans isomerase A [Homo sapiens]                                          | 35  | 7  | 90  | 7  | 1   | 165  | 18    | 7.81   | High      | High      | High      | High | High | High | High | High     | 1.87E+08 | 1.86E+08 | 1.91E+08 | 2.32E+08 | 3.82E+08 | 2.26E+08 | 123.92   | 7        | 922      | 7     |    |     |   |
| FALSE | None                     | 230 | 11342806  | PREDICTED: peptidyl-prolyl cis-trans isomerase A-like [Homo sapiens]                          | 5   | 1  | 11  | 1  | 1   | 186  | 20.4  | 6.42   | High      | High      | High      | High | High | High | High | High     | 1.24E+08 | 1.27E+08 | 1.31E+08 | 2.35E+08 | 2.27E+08 | 2.29E+08 | 12.65    | 1        | 88       | 1     |    |     |   |
| FALSE | Master Protein Candidate | 231 | 578812900 | PREDICTED: receptor-type tyrosine protein phosphatase kappa isoform X11 [Homo sapiens]        | 1   | 1  | 1   | 1  | 1   | 869  | 99.6  | 6.36   | High      | High      | High      | High | High | High | High | High     | 26572426 | 27463008 | 26551094 |          |          |          | 4.9      | 1        | 75       | 1     |    |     |   |
| FALSE | Master Protein Candidate | 231 | 578812900 | PREDICTED: receptor-type tyrosine protein phosphatase kappa isoform X11 [Homo sapiens]        | 1   | 1  | 1   | 1  | 1   | 869  | 99.6  | 6.36   | High      | High      | High      | High | High | High | High | High     | 26572426 | 27463008 | 26551094 |          |          |          | 4.9      | 1        | 75       | 1     |    |     |   |
| FALSE | Master Protein Candidate | 231 | 578812900 | PREDICTED: receptor-type tyrosine protein phosphatase kappa isoform X10 [Homo sapiens]        | 1   | 1  | 1   | 1  | 1   | 1081 | 123.2 | 6.46   | High      | High      | High      | High | High | High | High | High     | 26572426 | 27463008 | 26551094 |          |          |          | 4.9      | 1        | 75       | 1     |    |     |   |
| FALSE | Master Protein Candidate | 231 | 530389390 | PREDICTED: receptor-type tyrosine protein phosphatase kappa isoform X2 [Homo sapiens]         | 1   | 1  | 1   | 1  | 1   | 1464 | 165.4 | 6.13   | High      | High      | High      | High | High | High | High | High     | 26572426 | 27463008 | 26551094 |          |          |          | 4.9      | 1        | 75       | 1     |    |     |   |
| FALSE | Master Protein           | 231 | 578839565 | PREDICTED: receptor-type tyrosine protein phosphatase kappa isoform X2 [Homo sapiens]         | 1   | 1  | 1   | 1  | 1   | 1464 | 165.4 | 6.13   | High      | High      | High      | High | High | High | High | High     | 26572426 | 27463008 | 26551094 |          |          |          | 4.9      | 1        | 75       | 1     |    |     |   |
| FALSE | Master Protein Candidate | 231 | 18889002  | receptor-type tyrosine protein phosphatase kappa isoform 2 precursor [Homo sapiens]           | 1   | 1  | 1   | 1  | 1   | 1440 | 162.1 | 5.9    | High      | High      | High      | High | High | High | High | High     | 26572426 | 27463008 | 26551094 |          |          |          | 4.9      | 1        | 75       | 1     |    |     |   |
| FALSE | Master Protein Candidate | 231 | 530389398 | PREDICTED: receptor-type tyrosine protein phosphatase kappa isoform X6 [Homo sapiens]         | 2   | 1  | 5   | 1  | 1   | 890  | 99.3  | 6.77</ |           |           |           |      |      |      |      |          |          |          |          |          |          |          |          |          |          |       |    |     |   |



|       |                          |     |           |                                                                                |    |    |     |    |   |      |       |       |           |           |           |           |           |           |           |           |          |          |          |          |          |          |          |          |          |          |          |        |   |      |   |
|-------|--------------------------|-----|-----------|--------------------------------------------------------------------------------|----|----|-----|----|---|------|-------|-------|-----------|-----------|-----------|-----------|-----------|-----------|-----------|-----------|----------|----------|----------|----------|----------|----------|----------|----------|----------|----------|----------|--------|---|------|---|
| FALSE | Master Protein Candidate | 28  | 578810599 | PREDICTED: calpastatin isoform X14 (Homo sapiens)                              | 2  | 1  | 14  | 1  | 1 | 689  | 74.4  | 5.02  | High      | 32238201  | 40506822 | 36293432 | 69451327 | 73304800 | 74136379 | 20.1     | 1        | 266      | 1        |          |          |        |   |      |   |
| FALSE | Master Protein Candidate | 28  | 578810583 | PREDICTED: calpastatin isoform X6 (Homo sapiens)                               | 2  | 1  | 14  | 1  | 1 | 769  | 82.4  | 5.2   | High      | 32238201 | 40506822 | 36293432 | 69451327 | 73304800 | 74136379 | 20.2     | 1        | 266      | 1        |          |        |   |      |   |
| FALSE | Master Protein           | 28  | 157918632 | purine nucleoside phosphorylase (Homo sapiens)                                 | 9  | 2  | 13  | 2  | 1 | 289  | 32.1  | 6.1   | High      | 15792000 | 21252154 | 53518660 | 58169795 | 57239201 | 13.21    | 1        | 137      | 2        |          |          |        |   |      |   |
| FALSE | Master Protein Candidate | 28  | 38022527  | neutral alpha-glucosidase AB isoform 2 precursor (Homo sapiens)                | 6  | 4  | 9   | 4  | 1 | 944  | 106.8 | 6.14  | High      | Not Found | 27442841 | 42149511 | 74728569 | 61699632 | 6.68     | 4        | 0        | 0        | 3        |          |          |        |   |      |   |
| FALSE | None                     | 281 | 495989599 | neutral alpha-glucosidase AB isoform 5 (Homo sapiens)                          | 5  | 3  | 6   | 3  | 1 | 830  | 39.9  | 5.82  | High      | Not Found | High      | Not Found | 27442841 | 42149511 |          |          |          | 6.68     | 3        | 0        | 0        | 2        |          |        |   |      |   |
| FALSE | Master Protein           | 281 | 88000491  | neutral alpha-glucosidase AB isoform 3 precursor (Homo sapiens)                | 6  | 4  | 9   | 4  | 1 | 860  | 109.4 | 6.24  | High      | Not Found | High      | High      | Not Found | High      | Not Found | High      | 27442841 | 42149511 | 74728569 |          |          | 61699632 | 2.1      | 3        | 0        | 2        |          |        |   |      |   |
| FALSE | None                     | 281 | 49598957  | neutral alpha-glucosidase AB isoform 4 (Homo sapiens)                          | 5  | 3  | 6   | 3  | 1 | 852  | 98.5  | 5.84  | High      | Not Found | High      | Not Found | 27442841 | 42149511 |          |          |          | 6.68     | 3        | 0        | 2        |          |          |        |   |      |   |
| FALSE | Master Protein Candidate | 281 | 495989768 | neutral alpha-glucosidase AB isoform 6 (Homo sapiens)                          | 7  | 4  | 9   | 4  | 1 | 847  | 96.2  | 5.72  | High      | Not Found | High      | High      | Not Found | High      | Not Found | High      | 27442841 | 42149511 | 74728569 |          |          | 61699632 | 6.68     | 4        | 0        | 3        |          |        |   |      |   |
| FALSE | Master Protein           | 282 | 42055641  | proliferating cell nuclear antigen (Homo sapiens)                              | 2  | 2  | 15  | 2  | 1 | 261  | 28.8  | 4.69  | High      | 2354771  | 2932579  | 38950714 | 12063405 | 83289188 | 76181626 | 16.11    | 2        | 236      | 2        |          |        |   |      |   |
| FALSE | Master Protein           | 282 | 18033063  | nucleophosmin isoform 1 (Homo sapiens)                                         | 3  | 12 | 3   | 22 | 3 | 298  | 32.6  | 4.78  | High      | 1.12E+08 | 41E+08   | 40411608 | 3.42E+08 | 1.81E+08 | 1.69E+08 | 28.33    | 3        | 188      | 3        |          |        |   |      |   |
| FALSE | Master Protein Candidate | 283 | 40353734  | nucleophosmin isoform 2 (Homo sapiens)                                         | 4  | 13 | 3   | 22 | 4 | 265  | 29.4  | 4.63  | High      | 1.12E+08 | 41E+08   | 40411608 | 3.42E+08 | 1.81E+08 | 1.69E+08 | 28.33    | 3        | 188      | 3        |          |        |   |      |   |
| FALSE | None                     | 283 | 53081066  | PREDICTED: nucleophosmin isoform X2 (Homo sapiens)                             | 10 | 2  | 6   | 2  | 1 | 230  | 25.3  | 4.54  | Not Found | Not Found | High      | Not Found | High      | Not Found | High      | Not Found |          |          |          |          |          | 141181.6 | 276830   | 3.71     | 3        | 27       |          |        |   |      |   |
| FALSE | None                     | 283 | 57881124  | PREDICTED: nucleophosmin isoform X3 (Homo sapiens)                             | 7  | 1  | 2   | 1  | 1 | 181  | 19.9  | 4.4   | Not Found |          |          |          |          |          | 0        | 1        | 0        | 1        |          |          |        |   |      |   |
| FALSE | None                     | 283 | 83641870  | nucleophosmin isoform 1 (Homo sapiens)                                         | 8  | 2  | 6   | 2  | 1 | 259  | 28.4  | 4.72  | Not Found | Not Found | High      | Not Found | High      | Not Found | High      | Not Found |          |          |          |          |          | 141181.6 | 276830   | 3.71     | 2        | 27       |          |        |   |      |   |
| FALSE | Master Protein           | 284 | 530421753 | PREDICTED: moesin isoform X1 (Homo sapiens)                                    | 12 | 8  | 92  | 4  | 1 | 578  | 67.9  | 6.28  | High      | 51046239 | 49159737 | 52114667 | 79591391 | 76291316 | 92679611 | 127.9    | 8        | 1077     | 8        |          |        |   |      |   |
| FALSE | Master Protein Candidate | 284 | 4505257   | moesin (Homo sapiens)                                                          | 12 | 8  | 92  | 4  | 1 | 577  | 67.8  | 6.4   | High      | 51046239 | 49159737 | 52114667 | 79591391 | 76291316 | 92679611 | 127.9    | 8        | 1077     | 8        |          |        |   |      |   |
| FALSE | Master Protein Candidate | 285 | 578825985 | PREDICTED: proteasome activator complex subunit 2 isoform X1 (Homo sapiens)    | 10 | 1  | 6   | 1  | 1 | 163  | 18.6  | 7.99  | Not Found | Not Found | Not Found | High      | High      | High      | High      | High      |          |          |          |          |          | 27691260 | 34322976 | 8.18     | 1        | 18       | 1        |        |   |      |   |
| FALSE | Master Protein Candidate | 285 | 578825987 | PREDICTED: proteasome activator complex subunit 2 isoform X2 (Homo sapiens)    | 10 | 1  | 6   | 1  | 1 | 163  | 18.5  | 6.7   | Not Found | Not Found | Not Found | High      | High      | High      | High      | High      |          |          |          |          |          | 27691260 | 34322976 | 8.18     | 1        | 18       | 1        |        |   |      |   |
| FALSE | Master Protein           | 285 | 3041092   | proteasome activator complex subunit 2 (Homo sapiens)                          | 7  | 1  | 6   | 1  | 1 | 239  | 27.4  | 5.75  | Not Found | Not Found | Not Found | High      | High      | High      | High      | High      |          |          |          |          |          | 27691260 | 34322976 | 8.18     | 1        | 18       | 1        |        |   |      |   |
| FALSE | None                     | 286 | 54583760  | ubiquitin-conjugating enzyme E2 variant 1 isoform h (Homo sapiens)             | 10 | 1  | 2   | 1  | 1 | 91   | 10.4  | 9.36  | Not Found | Not Found | Not Found | High      | Not Found | Not Found | Not Found | Not Found |          |          |          |          |          | 42365112 | 1.95     | 1        | 0        | 1        |          |        |   |      |   |
| FALSE | None                     | 286 | 4507797   | ubiquitin-conjugating enzyme E2 variant 2 (Homo sapiens)                       | 10 | 1  | 5   | 1  | 1 | 145  | 16.4  | 8.09  | Not Found | Not Found | Not Found | High      | High      | High      | High      | High      |          |          |          |          |          | 48957501 | 44955352 | 44802025 | 4.79     | 1        | 33       | 1      |   |      |   |
| FALSE | None                     | 286 | 38992499  | ubiquitin-conjugating enzyme E2 variant 1 isoform i (Homo sapiens)             | 18 | 2  | 7   | 2  | 1 | 103  | 11.8  | 9.27  | Not Found | Not Found | Not Found | High      | Not Found | Not Found | Not Found | Not Found |          |          |          |          |          | 42365112 | 1.95     | 1        | 0        | 1        |          |        |   |      |   |
| FALSE | Master Protein Candidate | 286 | 38387250  | ubiquitin-conjugating enzyme E2 variant 1 isoform e (Homo sapiens)             | 13 | 2  | 7   | 2  | 1 | 144  | 16.2  | 6.7   | Not Found | Not Found | High      | High      | High      | High      | High      | High      |          |          |          |          |          | 42365112 | 48957501 | 44955352 | 44802025 | 6.74     | 2        | 33     | 2 |      |   |
| FALSE | None                     | 286 | 54583766  | ubiquitin-conjugating enzyme E2 variant 1 isoform i (Homo sapiens)             | 16 | 1  | 5   | 1  | 1 | 64   | 6.9   | 4.78  | Not Found | Not Found | Not Found | High      | High      | High      | High      | High      |          |          |          |          |          | 48957501 | 44955352 | 44802025 | 4.79     | 1        | 33       | 1      |   |      |   |
| FALSE | None                     | 286 | 38387250  | ubiquitin-conjugating enzyme E2 variant 1 isoform i (Homo sapiens)             | 10 | 1  | 5   | 1  | 1 | 105  | 11.8  | 5.52  | Not Found | Not Found | Not Found | High      | High      | High      | High      | High      |          |          |          |          |          | 48957501 | 44955352 | 44802025 | 4.79     | 1        | 33       | 1      |   |      |   |
| FALSE | Master Protein Candidate | 286 | 54583768  | ubiquitin-conjugating enzyme E2 variant 1 isoform e (Homo sapiens)             | 16 | 2  | 7   | 2  | 1 | 105  | 12    | 9.72  | Not Found | Not Found | Not Found | High      | High      | High      | High      | High      |          |          |          |          |          | 42365112 | 48957501 | 44955352 | 44802025 | 6.74     | 2        | 33     | 2 |      |   |
| FALSE | Master Protein           | 286 | 4806190   | TNEM189-UBE2V1 fusion protein (Homo sapiens)                                   | 5  | 2  | 7   | 2  | 1 | 370  | 42.2  | 6.61  | Not Found | Not Found | High      | High      | High      | High      | High      | High      |          |          |          |          |          | 42365112 | 48957501 | 44955352 | 44802025 | 6.74     | 2        | 33     | 2 |      |   |
| FALSE | Master Protein Candidate | 286 | 73765546  | ubiquitin-conjugating enzyme E2 variant 1 isoform i (Homo sapiens)             | 13 | 2  | 7   | 2  | 1 | 147  | 16.5  | 7.93  | Not Found | Not Found | High      | High      | High      | High      | High      | High      |          |          |          |          |          | 42365112 | 48957501 | 44955352 | 44802025 | 6.74     | 2        | 33     | 2 |      |   |
| FALSE | Master Protein Candidate | 286 | 4806167   | ubiquitin-conjugating enzyme E2 variant 1 isoform i (Homo sapiens)             | 11 | 2  | 7   | 2  | 1 | 170  | 19.3  | 8.54  | Not Found | Not Found | High      | High      | High      | High      | High      | High      |          |          |          |          |          | 42365112 | 48957501 | 44955352 | 44802025 | 6.74     | 2        | 33     | 2 |      |   |
| FALSE | None                     | 286 | 53084660  | PREDICTED: ubiquitin-conjugating enzyme E2 variant 2 isoform X1 (Homo sapiens) | 12 | 5  | 4   | 12 | 1 | 266  | 30.3  | 5.83  | Not Found | Not Found | Not Found | High      | Not Found | Not Found | Not Found | Not Found |          |          |          |          |          | 48957501 | 44955352 | 44802025 | 6.74     | 2        | 33       | 2      |   |      |   |
| FALSE | Master Protein           | 287 | 11527402  | integral membrane protein 28 (Homo sapiens)                                    | 4  | 1  | 2   | 1  | 1 | 266  | 30.3  | 5.84  | Not Found | Not Found | Not Found | High      | Not Found | Not Found | Not Found | Not Found |          |          |          |          |          | 8642309  | 1.85     | 1        | 33       | 1        |          |        |   |      |   |
| FALSE | Master Protein           | 288 | 5303076   | protein S100-A11 (Homo sapiens)                                                | 15 | 2  | 340 | 2  | 1 | 105  | 11.7  | 7.12  | High      |          |          |          |          |          | 6.4E+08  | 7.6E+08  | 3.4E+08  | 1.37E+09 | 1.36E+09 | 1.38E+09 | 522.23 | 1 | 3556 | 2 |
| FALSE | None                     | 288 | 530307948 | PREDICTED: serine/arginine-rich splicing factor 7 isoform X3 (Homo sapiens)    | 10 | 1  | 12  | 1  | 1 | 137  | 15.8  | 9.81  | High      |          |          |          |          |          | 87386110 | 89374110 | 88050209 | 2.65E+08 | 2.65E+08 | 2.76E+08 | 15.71  | 1 | 128  | 1 |
| FALSE | None                     | 288 | 530307944 | PREDICTED: serine/arginine-rich splicing factor 7 isoform X3 (Homo sapiens)    | 10 | 1  | 12  | 1  | 1 | 235  | 16.9  | 11.85 | High      |          |          |          |          |          | 87386110 | 89374110 | 88050209 | 2.65E+08 | 2.65E+08 | 2.76E+08 | 15.71  | 1 | 128  | 1 |
| FALSE | Master Protein           | 289 | 4506901   | serine/arginine-rich splicing factor 3 (Homo sapiens)                          | 14 | 2  | 22  | 2  | 1 | 164  | 19.3  | 11.65 | High      |          |          |          |          |          | 6.97E+08 | 1.97E+09 | 2.05E+08 | 26.45    | 2        | 160      | 2      |   |      |   |
| FALSE | None                     | 289 | 530367946 | PREDICTED: serine/arginine-rich splicing factor 7 isoform X2 (Homo sapiens)    | 6  | 1  | 12  | 2  | 1 | 223  | 25.6  | 11.8  | High      |          |          |          |          |          | 87386110 | 89374110 | 88050209 | 2.65E+08 | 2.65E+08 | 2.76E+08 | 15.71  | 1 | 128  | 1 |
| FALSE | None                     | 289 | 38568268  | serine/arginine-rich splicing factor 7 isoform 2 (Homo sapiens)                | 6  | 1  | 12  | 2  | 1 | 226  | 26    | 11.77 | High      |          |          |          |          |          | 87386110 | 89374110 | 88050209 | 2.65E+08 | 2.65E+08 | 2.76E+08 | 15.71  | 1 | 128  | 1 |
| FALSE | None                     | 289 | 7534660   | serine/arginine-rich splicing factor 7 isoform 1 (Homo sapiens)                | 12 | 2  | 12  | 12 | 1 | 228  | 26    | 11.88 | High      |          |          |          |          |          | 87386110 | 89374110 | 88050209 | 2.65E+08 | 2.65E+08 | 2.76E+08 | 15.71  | 1 | 128  | 1 |
| FALSE | Master Protein           | 29  | 40317626  | thrombospondin-1 precursor (Homo sapiens)                                      | 7  | 7  | 56  | 7  | 1 | 1170 | 129.3 | 4.94  | High      |          |          |          |          |          | 71342997 | 73770144 | 70288212 | 1.15E+08 | 1.08E+08 | 1.11E+08 | 64.55  | 7 | 490  | 7 |
| FALSE | Master Protein           | 290 | 4504183   | glutathione S-transferase P (Homo sapiens)                                     | 40 | 7  | 88  | 7  | 1 | 210  | 23.3  | 5.64  | High      |          |          |          |          |          | 2.63E+08 | 2.72E+08 | 2.65E+08 | 5.69E+08 | 3.34E+08 | 6.38E+08 | 124.23 | 6 | 1087 | 6 |
| FALSE | None                     | 290 | 5455710   | LM and SH3 domain protein 1 isoform A (Homo sapiens)                           | 3  | 1  | 4   | 1  | 1 | 261  | 29.7  | 7.85  | High      |          |          |          |          |          | 58453803 | 59515700 | 62088350 | 1.42E+08 | 1.41E+08 | 1.38E+08 | 4.35   | 1 | 56   | 1 |
| FALSE | None                     | 290 | 41044379  | LM and SH3 domain protein 1 isoform B (Homo sapiens)                           | 6  | 1  | 8   | 1  | 1 | 205  | 23.2  |       |           |           |           |           |           |           |           |           |          |          |          |          |          |          |          |          |          |          |          |        |   |      |   |

|       |                          |     |           |                                                                            |    |   |    |   |   |      |       |      |           |           |           |           |           |           |           |          |          |          |          |          |          |          |      |     |    |   |
|-------|--------------------------|-----|-----------|----------------------------------------------------------------------------|----|---|----|---|---|------|-------|------|-----------|-----------|-----------|-----------|-----------|-----------|-----------|----------|----------|----------|----------|----------|----------|----------|------|-----|----|---|
| FALSE | Master Protein Candidate | 307 | 227430301 | CD109 antigen isoform 2 precursor [Homo sapiens]                           | 5  | 5 | 38 | 5 | 1 | 1428 | 159.6 | 5.8  | High      | 33383096 | 23818427 | 25666922 | 48178488 | 59765940 | 51095916 | 40.6     | 5    | 264 | 5  |   |
| FALSE | Master Protein           | 308 | 4738950   | pepdylyl-prolyl cis-trans isomerase B precursor [Homo sapiens]             | 37 | 7 | 70 | 7 | 1 | 216  | 23.7  | 9.41 | High      | 248E+08  | 3.08E+08 | 3.17E+08 | 6.31E+08 | 6.32E+08 | 6.02E+08 | 66.15    | 7    | 386 | 7  |   |
| FALSE | Master Protein           | 309 | 11320075  | sulphydryl oxidase 1 isoform A precursor [Homo sapiens]                    | 13 | 7 | 80 | 7 | 1 | 747  | 82.1  | 8.9  | High      | 61329299 | 72376861 | 6691242  | 94038485 | 89432480 | 1.02E+08 | 101.3    | 7    | 789 | 7  |   |
| FALSE | None                     | 309 | 51873007  | sulphydryl oxidase 1 isoform B precursor [Homo sapiens]                    | 14 | 6 | 76 | 6 | 1 | 604  | 66.8  | 8.56 | High      | 61329299 | 71282395 | 95015242 | 94038485 | 89432480 | 1.02E+08 | 96.23    | 6    | 782 | 6  |   |
| FALSE | Master Protein           | 310 | 4505185   | macrophage migration inhibitory factor [Homo sapiens]                      | 7  | 1 | 4  | 1 | 1 | 115  | 12.5  | 7.88 | Not Found | 19664763 | 24134008 | 25724975 |          |          | 1.65     | 1        | 36   | 1   |    |   |
| FALSE | Master Protein Candidate | 310 | 51066790  | protocadherin-1 isoform 3 [Homo sapiens]                                   | 1  | 1 | 6  | 1 | 1 | 1076 | 116.7 | 5.06 | High      | 19664763 | 24134008 | 25724975 |          |          | 7.41     | 1        | 61   | 1   |    |   |
| FALSE | Master Protein Candidate | 310 | 53038656  | PREDICTED: protocadherin-1 isoform X3 [Homo sapiens]                       | 1  | 1 | 6  | 1 | 1 | 1158 | 125.6 | 5.14 | High      | 19664763 | 24134008 | 25724975 |          |          | 7.41     | 1        | 61   | 1   |    |   |
| FALSE | Master Protein           | 310 | 53038656  | PREDICTED: protocadherin-1 isoform X1 [Homo sapiens]                       | 1  | 1 | 6  | 1 | 1 | 1281 | 138.7 | 5.17 | High      | 19664763 | 24134008 | 25724975 |          |          | 7.41     | 1        | 61   | 1   |    |   |
| FALSE | Master Protein Candidate | 310 | 27545773  | protocadherin-1 isoform 2 precursor [Homo sapiens]                         | 1  | 1 | 6  | 1 | 1 | 1237 | 133.6 | 5.06 | High      | 19664763 | 24134008 | 25724975 |          |          | 7.41     | 1        | 61   | 1   |    |   |
| FALSE | Master Protein Candidate | 310 | 53038656  | PREDICTED: protocadherin-1 isoform X2 [Homo sapiens]                       | 1  | 1 | 6  | 1 | 1 | 1215 | 134.1 | 5.03 | High      | 19664763 | 24134008 | 25724975 |          |          | 7.41     | 1        | 61   | 1   |    |   |
| FALSE | Master Protein Candidate | 310 | 20754771  | protocadherin-1 isoform 1 precursor [Homo sapiens]                         | 1  | 1 | 6  | 1 | 1 | 1066 | 114.7 | 5.03 | High      | 19664763 | 24134008 | 25724975 |          |          | 7.41     | 1        | 61   | 1   |    |   |
| FALSE | Master Protein           | 311 | 20249675  | EF-hand domain-containing protein D2 [Homo sapiens]                        | 3  | 1 | 6  | 1 | 1 | 240  | 26.7  | 5.2  | Not Found | High      | High      | High      | High      | High      | High      | 11287304 | 10646700 | 26313550 |          |          | 1.82     | 1        | 36   | 1   |    |   |
| FALSE | Master Protein           | 312 | 21624607  | coactin-like protein [Homo sapiens]                                        | 11 | 1 | 18 | 1 | 1 | 142  | 15.9  | 5.67 | High      | 54441072 | 50360465 | 48187733 | 1.22E+08 | 1.33E+08 | 1.31E+08 | 28.54    | 1    | 249 | 1  |   |
| FALSE | Master Protein           | 314 | 7657176   | protein canopy homolog 2 isoform 1 precursor [Homo sapiens]                | 9  | 1 | 4  | 1 | 1 | 182  | 20.6  | 4.92 | Not Found |          |          |          |          |          | 14032263 | 24282656 | 5.3  | 1   | 21 | 1 |
| FALSE | Master Protein Candidate | 314 | 300370407 | protein canopy homolog 2 isoform 2 precursor [Homo sapiens]                | 19 | 1 | 4  | 1 | 1 | 84   | 9.1   | 7.3  | Not Found |          |          |          |          |          | 14032263 | 24282656 | 5.2  | 1   | 21 | 1 |
| FALSE | Master Protein Candidate | 315 | 530417131 | PREDICTED: vasodilator-stimulated phosphoprotein isoform X2 [Homo sapiens] | 4  | 1 | 3  | 1 | 1 | 379  | 39.7  | 8.94 | Not Found |          |          |          |          |          | 13252730 | 24810564 | 2.21 | 1   | 0  | 1 |
| FALSE | Master Protein Candidate | 315 | 530417131 | PREDICTED: vasodilator-stimulated phosphoprotein isoform X1 [Homo sapiens] | 4  | 1 | 3  | 1 | 1 | 379  | 39.7  | 8.94 | Not Found |          |          |          |          |          | 13252730 | 24810564 | 2.21 | 1   | 0  | 1 |
| FALSE | Master Protein           | 315 | 4507869   | vasodilator-stimulated phosphoprotein [Homo sapiens]                       | 4  | 1 | 3  | 1 | 1 | 380  | 39.8  | 8.94 | Not Found |          |          |          |          |          | 13252730 | 24810564 | 2.21 | 1   | 0  | 1 |
| FALSE | Master Protein Candidate | 316 | 291575128 | L-lactate dehydrogenase B chain [Homo sapiens]                             | 16 | 5 | 41 | 5 | 1 | 334  | 36.6  | 6.05 | High      | 1.1E+08  | 1.17E+08 | 1.07E+08 | 3.05E+08 | 2.39E+08 | 98905271 | 56.9     | 5    | 405 | 5  |   |
| FALSE | Master Protein           | 316 | 578822859 | PREDICTED: L-lactate dehydrogenase B chain isoform X1 [Homo sapiens]       | 15 | 5 | 41 | 5 | 1 | 353  | 39.4  | 8.9  | High      | 1.1E+08  | 1.17E+08 | 1.07E+08 | 3.05E+08 | 2.39E+08 | 98905271 | 56.9     | 5    | 405 | 5  |   |
| FALSE | None                     | 317 | 530401711 | PREDICTED: GTP-binding nuclear protein Ran isoform X1 [Homo sapiens]       | 11 | 1 | 10 | 1 | 1 | 128  | 14.7  | 6.32 | High      | 20389493 | 19460955 | 45287321 | 43730836 | 39489367 | 8.4      | 1        | 41   | 1   |    |   |
| FALSE | Master Protein           | 317 | 5425555   | GTP-binding nuclear protein Ran [Homo sapiens]                             | 12 | 2 | 15 | 2 | 1 | 216  | 24.4  | 7.89 | High      | 20389493 | 23879144 | 45287321 | 43414405 | 50164565 | 12.53    | 2        | 44   | 2   |    |   |
| FALSE | Master Protein Candidate | 316 | 291575128 | L-lactate dehydrogenase B chain [Homo sapiens]                             | 16 | 5 | 41 | 5 | 1 | 334  | 36.6  | 6.05 | High      | 1.1E+08  | 1.17E+08 | 1.07E+08 | 3.05E+08 | 2.39E+08 | 98905271 | 56.9     | 5    | 405 | 5  |   |
| FALSE | Master Protein           | 316 | 578822859 | PREDICTED: L-lactate dehydrogenase B chain isoform X1 [Homo sapiens]       | 15 | 5 | 41 | 5 | 1 | 353  | 39.4  | 8.9  | High      | 1.1E+08  | 1.17E+08 | 1.07E+08 | 3.05E+08 | 2.39E+08 | 98905271 | 56.9     | 5    | 405 | 5  |   |
| FALSE | None                     | 317 | 530401711 | PREDICTED: GTP-binding nuclear protein Ran isoform X1 [Homo sapiens]       | 11 | 1 | 10 | 1 | 1 | 128  | 14.7  | 6.32 | High      | 20389493 | 19460955 | 45287321 | 43730836 | 39489367 | 8.4      | 1        | 41   | 1   |    |   |
| FALSE | Master Protein           | 317 | 5425555   | GTP-binding nuclear protein Ran [Homo sapiens]                             | 12 | 2 | 15 | 2 | 1 | 216  | 24.4  | 7.89 | High      | 20389493 | 23879144 | 45287321 | 43414405 | 50164565 | 12.53    | 2        | 44   | 2   |    |   |
| FALSE | Master Protein Candidate | 316 | 291575128 | L-lactate dehydrogenase B chain [Homo sapiens]                             | 16 | 5 | 41 | 5 | 1 | 334  | 36.6  | 6.05 | High      | 1.1E+08  | 1.17E+08 | 1.07E+08 | 3.05E+08 | 2.39E+08 | 98905271 | 56.9     | 5    | 405 | 5  |   |
| FALSE | Master Protein           | 316 | 578822859 | PREDICTED: L-lactate dehydrogenase B chain isoform X1 [Homo sapiens]       | 15 | 5 | 41 | 5 | 1 | 353  | 39.4  | 8.9  | High      | 1.1E+08  | 1.17E+08 | 1.07E+08 | 3.05E+08 | 2.39E+08 | 98905271 | 56.9     | 5    | 405 | 5  |   |
| FALSE | None                     | 318 | 530401711 | PREDICTED: GTP-binding nuclear protein Ran isoform X1 [Homo sapiens]       | 11 | 1 | 10 | 1 | 1 | 128  | 14.7  | 6.32 | High      | 20389493 | 19460955 | 45287321 | 43730836 | 39489367 | 8.4      | 1        | 41   | 1   |    |   |
| FALSE | Master Protein           | 318 | 5425555   | GTP-binding nuclear protein Ran [Homo sapiens]                             | 12 | 2 | 15 | 2 | 1 | 216  | 24.4  | 7.89 | High      | 20389493 | 23879144 | 45287321 | 43414405 | 50164565 | 12.53    | 2        | 44   | 2   |    |   |
| FALSE | Master Protein Candidate | 316 | 291575128 | L-lactate dehydrogenase B chain [Homo sapiens]                             | 16 | 5 | 41 | 5 | 1 | 334  | 36.6  | 6.05 | High      | 1.1E+08  | 1.17E+08 | 1.07E+08 | 3.05E+08 | 2.39E+08 | 98905271 | 56.9     | 5    | 405 | 5  |   |
| FALSE | Master Protein           | 316 | 578822859 | PREDICTED: L-lactate dehydrogenase B chain isoform X1 [Homo sapiens]       | 15 | 5 | 41 | 5 | 1 | 353  | 39.4  | 8.9  | High      | 1.1E+08  | 1.17E+08 | 1.07E+08 | 3.05E+08 | 2.39E+08 | 98905271 | 56.9     | 5    | 405 | 5  |   |
| FALSE | None                     | 318 | 530401711 | PREDICTED: GTP-binding nuclear protein Ran isoform X1 [Homo sapiens]       | 11 | 1 | 10 | 1 | 1 | 128  | 14.7  | 6.32 | High      | 20389493 | 19460955 | 45287321 | 43730836 | 39489367 | 8.4      | 1        | 41   | 1   |    |   |
| FALSE | Master Protein           | 318 | 5425555   | GTP-binding nuclear protein Ran [Homo sapiens]                             | 12 | 2 | 15 | 2 | 1 | 216  | 24.4  | 7.89 | High      | 20389493 | 23879144 | 45287321 | 43414405 | 50164565 | 12.53    | 2        | 44   | 2   |    |   |
| FALSE | Master Protein Candidate | 316 | 291575128 | L-lactate dehydrogenase B chain [Homo sapiens]                             | 16 | 5 | 41 | 5 | 1 | 334  | 36.6  | 6.05 | High      | 1.1E+08  | 1.17E+08 | 1.07E+08 | 3.05E+08 | 2.39E+08 | 98905271 | 56.9     | 5    | 405 | 5  |   |
| FALSE | Master Protein           | 318 | 5425555   | GTP-binding nuclear protein Ran [Homo sapiens]                             | 12 | 2 | 15 | 2 | 1 | 216  | 24.4  | 7.89 | High      | 20389493 | 23879144 | 45287321 | 43414405 | 50164565 | 12.53    | 2        | 44   | 2   |    |   |
| FALSE | None                     | 318 | 530401711 | PREDICTED: GTP-binding nuclear protein Ran isoform X1 [Homo sapiens]       | 11 | 1 | 10 | 1 | 1 | 128  | 14.7  | 6.32 | High      | 20389493 | 19460955 | 45287321 | 43730836 | 39489367 | 8.4      | 1        | 41   | 1   |    |   |
| FALSE | Master Protein           | 318 | 5425555   | GTP-binding nuclear protein Ran [Homo sapiens]                             | 12 | 2 | 15 | 2 | 1 | 216  | 24.4  | 7.89 | High      | 20389493 | 23879144 | 45287321 | 43414405 | 50164565 | 12.53    | 2        | 44   | 2   |    |   |
| FALSE | Master Protein Candidate | 319 | 394582099 | DNA replication licensing factor NCM2 isoform 1 [Homo sapiens]             | 1  | 1 | 12 | 1 | 1 | 818  | 19.9  | 6.33 | High      | 1337681  | 12174830 | 11262291 | 308675   | 3466573  | 31856034 | 12.66    | 1    | 133 | 1  |   |
| FALSE | Master Protein           | 319 | 394582099 | DNA replication licensing factor NCM2 isoform 1 [Homo sapiens]             | 1  | 1 | 12 | 1 | 1 | 818  | 19.9  | 6.33 | High      | 1337681  | 12174830 | 11262291 | 308675   | 3466573  | 31856034 | 12.66    | 1    | 133 | 1  |   |
| FALSE | None                     | 319 | 394582099 | DNA replication licensing factor NCM2 isoform 1 [Homo sapiens]             | 1  | 1 | 12 | 1 | 1 | 818  | 19.9  | 6.33 | High      | 1337681  | 12174830 | 11262291 | 308675   | 3466573  | 31856034 | 12.66    | 1    | 133 | 1  |   |
| FALSE | None                     | 319 | 394582099 | DNA replication licensing factor NCM2 isoform 1 [Homo sapiens]             | 1  | 1 | 12 | 1 | 1 | 818  | 19.9  | 6.33 | High      | 1337681  | 12174830 | 11262291 | 308675   | 3466573  | 31856034 | 12.66    | 1    | 133 | 1  |   |
| FALSE | None                     | 319 | 394582099 | DNA replication licensing factor NCM2 isoform 1 [Homo sapiens]             | 1  | 1 | 12 | 1 | 1 | 818  | 19.9  | 6.33 | High      | 1337681  | 12174830 | 11262291 | 308675   | 3466573  | 31856034 | 12.66    | 1    | 133 | 1  |   |
| FALSE | None                     | 319 | 394582099 | DNA replication licensing factor NCM2 isoform 1 [Homo sapiens]             | 1  | 1 | 12 | 1 | 1 | 818  | 19.9  | 6.33 | High      | 1337681  | 12174830 | 11262291 | 308675   | 3466573  | 31856034 | 12.66    | 1    | 133 | 1  |   |
| FALSE | None                     | 319 | 394582099 | DNA replication licensing factor NCM2 isoform 1 [Homo sapiens]             | 1  | 1 | 12 | 1 | 1 | 818  | 19.9  | 6.33 | High      | 1337681  | 12174830 | 11262291 | 308675   | 3466573  | 31856034 | 12.66    | 1    | 133 | 1  |   |
| FALSE | None                     | 319 | 394582099 | DNA replication licensing factor NCM2 isoform 1 [Homo sapiens]             | 1  | 1 | 12 | 1 | 1 | 818  | 19.9  | 6.33 | High      | 1337681  | 12174830 | 11262291 | 308675   | 3466573  | 31856034 | 12.66    | 1    | 133 | 1  |   |
| FALSE | None                     | 319 | 394582099 | DNA replication licensing factor NCM2 isoform 1 [Homo sapiens]             | 1  | 1 | 12 | 1 | 1 | 818  | 19.9  | 6.33 | High      | 1337681  | 12174830 | 11262291 | 308675   | 3466573  | 31856034 | 12.66    | 1    | 133 | 1  |   |
| FALSE | None                     | 319 | 394582099 | DNA replication licensing factor NCM2 isoform 1 [Homo sapiens]             | 1  | 1 | 12 | 1 | 1 | 818  | 19.9  | 6.33 | High      | 1337681  | 12174830 | 11262291 | 308675   | 3466573  | 31856034 | 12.66    | 1    | 133 | 1  |   |
| FALSE | None                     | 319 | 394582099 | DNA replication licensing factor NCM2 isoform 1 [Homo sapiens]             | 1  | 1 | 12 | 1 | 1 | 818  | 19.9  |      |           |           |           |           |           |           |           |          |          |          |          |          |          |          |      |     |    |   |

|       |                          |           |                                                                           |    |   |    |   |   |      |       |      |           |           |           |           |           |           |           |           |          |          |          |          |          |          |          |       |     |    |   |
|-------|--------------------------|-----------|---------------------------------------------------------------------------|----|---|----|---|---|------|-------|------|-----------|-----------|-----------|-----------|-----------|-----------|-----------|-----------|----------|----------|----------|----------|----------|----------|----------|-------|-----|----|---|
| FALSE | None                     | 578800924 | PREDICTED: laminin subunit gamma-2 isoform X2 [Homo sapiens]              | 6  | 5 | 25 | 5 | 1 | 1208 | 132   | 6.64 | High      | 29811848 | 34605170 | 31046118 | 31372351 | 58359433 | 56810062 | 35.92    | 5     | 220 | 5  |   |
| FALSE | Master Protein           | 315259111 | NECDOR-MBP1 protein [Homo sapiens]                                        | 7  | 1 | 12 | 1 | 1 | 193  | 22    | 6.37 | High      | 25393206 | 27854346 | 28288291 | 92233506 | 90597587 | 85887237 | 16.92    | 1     | 93  | 1  |   |
| FALSE | Master Protein Candidate | 5453790   | NECDOR precursor [Homo sapiens]                                           | 17 | 1 | 12 | 1 | 1 | 81   | 21    | 8.41 | High      | 25393206 | 27854346 | 28288291 | 92233506 | 90597587 | 85887237 | 16.92    | 1     | 93  | 1  |   |
| FALSE | Master Protein           | 11545893  | brain-specific serine protease 4 precursor [Homo sapiens]                 | 5  | 1 | 3  | 1 | 1 | 317  | 33.7  | 7.61 | High      | High      | Not Found | 36737916 | 37917006 |          |          |          |          | 2.34     | 1     | 62  | 1  |   |
| FALSE | Master Protein Candidate | 578828174 | PREDICTED: brain-specific serine protease 4 isoform X2 [Homo sapiens]     | 6  | 1 | 3  | 1 | 1 | 246  | 26.4  | 7.36 | High      | High      | Not Found | 36737916 | 37917006 |          |          |          |          | 2.34     | 1     | 62  | 1  |   |
| FALSE | Master Protein Candidate | 7706573   | 45 kDa calcium-binding protein isoform 1 precursor [Homo sapiens]         | 3  | 1 | 6  | 1 | 1 | 348  | 39.6  | 5.11 | High      | 22048626 | 20503990 | 22697256 |          |          |          | 4.47     | 1     | 123 | 1  |   |
| FALSE | Master Protein           | 138697932 | 45 kDa calcium-binding protein isoform 2 precursor [Homo sapiens]         | 3  | 6 | 29 | 1 | 1 | 362  | 41.8  | 4.86 | High      | 22802486 | 20509901 | 22697256 |          |          |          | 8.47     | 1     | 133 | 1  |   |
| FALSE | Master Protein           | 57882140  | PREDICTED: periplakin isoform X1 [Homo sapiens]                           | 1  | 1 | 3  | 1 | 1 | 1759 | 205.5 | 5.49 | Not Found | Not Found | Not Found | Not Found | High      | High      | Not Found | High      |          |          |          |          |          |          | 2.53     | 1     | 0   | 1  |   |
| FALSE | Master Protein Candidate | 44549397  | periplakin [Homo sapiens]                                                 | 1  | 1 | 3  | 1 | 1 | 1766 | 204.6 | 5.58 | Not Found | Not Found | Not Found | Not Found | High      | High      | Not Found | High      |          |          |          |          |          |          | 2.53     | 1     | 0   | 1  |   |
| FALSE | None                     | 68303565  | proteasome subunit alpha type-7-like isoform 3 [Homo sapiens]             | 25 | 4 | 3  | 4 | 1 | 212  | 23.7  | 9.11 | High      | 48205619 | 50603951 | 53873788 | 99585301 | 79508983 | 91936720 | 27.47    | 4     | 237 | 4  |   |
| FALSE | None                     | 530433651 | PREDICTED: proteasome subunit alpha type-7-like isoform X1 [Homo sapiens] | 17 | 3 | 18 | 2 | 1 | 224  | 25    | 8.24 | High      | 48205619 | 50603951 | 53873788 | 1.32E+08 | 85580717 | 1.12E+08 | 15.56    | 3     | 227 | 3  |   |
| FALSE | None                     | 68303563  | proteasome subunit alpha type-7-like isoform 2 [Homo sapiens]             | 22 | 4 | 24 | 4 | 1 | 250  | 27.8  | 8.96 | High      | 48205619 | 50603951 | 53873788 | 99585301 | 79508983 | 91936720 | 27.47    | 4     | 235 | 4  |   |
| FALSE | None                     | 68303561  | proteasome subunit alpha type-7-like isoform 1 [Homo sapiens]             | 21 | 4 | 24 | 4 | 1 | 256  | 28.5  | 8.96 | High      | 48205619 | 50603951 | 53873788 | 99585301 | 79508983 | 91936720 | 27.47    | 4     | 235 | 4  |   |
| FALSE | Master Protein           | 4506189   | proteasome subunit alpha type 7 [Homo sapiens]                            | 12 | 6 | 29 | 1 | 1 | 248  | 27.9  | 8.96 | High      | 41853262 | 50603951 | 46079466 | 99585301 | 79508983 | 91936720 | 35.48    | 6     | 255 | 6  |   |
| FALSE | None                     | 41147376  | annexin A8 isoform 3 [Homo sapiens]                                       | 10 | 2 | 10 | 2 | 1 | 265  | 30    | 5.34 | High      | High      | High      | High      | Not Found | Not Found | Not Found | Not Found | 19404063 | 2167200  | 22936548 |          |          |          | 11.86    | 2     | 42  | 2  |   |
| FALSE | None                     | 52525794  | annexin A8-like protein 1 isoform 3 [Homo sapiens]                        | 17 | 3 | 19 | 3 | 1 | 270  | 30.5  | 6.8  | High      | 42233670 | 4438411  | 45957967 | 1.11E+08 | 1.07E+08 | 97001755 | 34.32    | 3     | 410 | 2  |   |
| FALSE | None                     | 578844916 | PREDICTED: annexin A8-like [Homo sapiens]                                 | 14 | 3 | 17 | 3 | 1 | 305  | 33.6  | 9.35 | High      | 44715028 | 67111023 | 46979145 | 1.11E+08 | 1.07E+08 | 97001755 | 31.7     | 3     | 412 | 2  |   |
| FALSE | None                     | 525253785 | annexin A8-like protein 1 isoform 2 [Homo sapiens]                        | 15 | 3 | 17 | 3 | 1 | 276  | 30.7  | 8.28 | Not Found | Not Found | Not Found | Not Found | High      | High      | High      | High      |          |          |          |          |          |          | 85360959 | 17.2  | 1   | 0  | 1 |
| FALSE | Master Protein Candidate | 534552373 | annexin A8-like protein 1 isoform 1 [Homo sapiens]                        | 18 | 4 | 23 | 4 | 1 | 327  | 36.9  | 5.78 | High      | 35331587 | 4438411  | 37957886 | 1.11E+08 | 1.07E+08 | 97001755 | 38.94    | 4     | 417 | 3  |   |
| FALSE | Master Protein           | 578819715 | PREDICTED: annexin A8 isoform X2 [Homo sapiens]                           | 17 | 4 | 23 | 4 | 1 | 351  | 39.5  | 6.1  | High      | 35331587 | 4438411  | 37957886 | 1.11E+08 | 1.07E+08 | 97001755 | 38.94    | 4     | 417 | 3  |   |
| FALSE | None                     | 41147374  | annexin A8 isoform 1 [Homo sapiens]                                       | 12 | 3 | 11 | 3 | 1 | 365  | 40.7  | 6.04 | High      | High      | High      | High      | Not Found | Not Found | High      | High      | 19404063 | 2167200  | 22936548 |          |          |          | 85360959 | 14.06 | 3   | 42 | 2 |
| FALSE | Master Protein Candidate | 91807122  | annexin A8-like protein 2 [Homo sapiens]                                  | 18 | 4 | 23 | 4 | 1 | 327  | 36.8  | 5.62 | High      | 35331587 | 4438411  | 37957886 | 1.11E+08 | 1.07E+08 | 97001755 | 38.94    | 4     | 417 | 3  |   |
| FALSE | Master Protein Candidate | 91823262  | annexin A8 isoform 2 [Homo sapiens]                                       | 18 | 4 | 23 | 4 | 1 | 327  | 36.9  | 5.78 | High      | 35331587 | 4438411  | 37957886 | 1.11E+08 | 1.07E+08 | 97001755 | 38.94    | 4     | 417 | 3  |   |
| FALSE | Master Protein Candidate | 324021736 | amyloid beta A4 protein isoform 1 precursor [Homo sapiens]                | 1  | 1 | 12 | 1 | 1 | 733  | 82.9  | 4.78 | High      | 60257329 | 61975453 | 51704204 | 1.12E+08 | 1.04E+08 | 1.16E+08 | 16.25    | 1     | 47  | 1  |   |
| FALSE | Master Protein Candidate | 209915575 | amyloid beta A4 protein isoform 2 precursor [Homo sapiens]                | 2  | 1 | 12 | 1 | 1 | 660  | 75.1  | 4.84 | High      | 60257329 | 61975453 | 51704204 | 1.12E+08 | 1.04E+08 | 1.16E+08 | 16.25    | 1     | 47  | 1  |   |
| FALSE | Master Protein Candidate | 41400555  | amyloid beta A4 protein isoform 3 precursor [Homo sapiens]                | 1  | 1 | 12 | 1 | 1 | 751  | 84.8  | 4.79 | High      | 60257329 | 61975453 | 51704204 | 1.12E+08 | 1.04E+08 | 1.16E+08 | 16.25    | 1     | 47  | 1  |   |
| FALSE | Master Protein Candidate | 324021740 | amyloid beta A4 protein isoform 1 precursor [Homo sapiens]                | 1  | 1 | 12 | 1 | 1 | 677  | 76.7  | 4.81 | High      | 60257329 | 61975453 | 51704204 | 1.12E+08 | 1.04E+08 | 1.16E+08 | 16.25    | 1     | 47  | 1  |   |
| FALSE | Master Protein Candidate | 209915573 | amyloid beta A4 protein isoform 1 precursor [Homo sapiens]                | 1  | 1 | 12 | 1 | 1 | 714  | 80.8  | 4.82 | High      | 60257329 | 61975453 | 51704204 | 1.12E+08 | 1.04E+08 | 1.16E+08 | 16.25    | 1     | 47  | 1  |   |
| FALSE | Master Protein Candidate | 209915570 | amyloid beta A4 protein isoform 2 precursor [Homo sapiens]                | 2  | 1 | 12 | 1 | 1 | 639  | 72.5  | 4.82 | High      | 60257329 | 61975453 | 51704204 | 1.12E+08 | 1.04E+08 | 1.16E+08 | 16.25    | 1     | 47  | 1  |   |
| FALSE | Master Protein Candidate | 41400552  | amyloid beta A4 protein isoform 3 precursor [Homo sapiens]                | 1  | 1 | 12 | 1 | 1 | 697  | 78.6  | 4.82 | High      | 60257329 | 61975453 | 51704204 | 1.12E+08 | 1.04E+08 | 1.16E+08 | 16.25    | 1     | 47  | 1  |   |
| FALSE | Master Protein           | 4502167   | amyloid beta A4 protein isoform 4 precursor [Homo sapiens]                | 1  | 1 | 12 | 1 | 1 | 770  | 86.9  | 4.82 | High      | 60257329 | 61975453 | 51704204 | 1.12E+08 | 1.04E+08 | 1.16E+08 | 16.25    | 1     | 47  | 1  |   |
| FALSE | Master Protein Candidate | 209862831 | amyloid beta A4 protein isoform 5 [Homo sapiens]                          | 1  | 1 | 12 | 1 | 1 | 746  | 84.5  | 4.75 | High      | 60257329 | 61975453 | 51704204 | 1.12E+08 | 1.04E+08 | 1.16E+08 | 16.25    | 1     | 47  | 1  |   |
| FALSE | Master Protein Candidate | 130201738 | amyloid beta A4 protein isoform 6 precursor [Homo sapiens]                | 1  | 1 | 12 | 1 | 1 | 750  | 85    | 4.81 | High      | 60257329 | 61975453 | 51704204 | 1.12E+08 | 1.04E+08 | 1.16E+08 | 16.25    | 1     | 47  | 1  |   |
| FALSE | Master Protein           | 281337934 | CX3C chemokine receptor 1 isoform A [Homo sapiens]                        | 1  | 1 | 12 | 1 | 1 | 387  | 43.9  | 4.4  | Not Found | Not Found | Not Found | Not Found | High      | High      | High      | High      |          |          |          | 21512775 |          |          | 4.12     | 1     | 49  | 1  |   |
| FALSE | Master Protein Candidate | 281337924 | CX3C chemokine receptor 1 isoform B [Homo sapiens]                        | 1  | 1 | 12 | 1 | 1 | 355  | 40.4  | 4.17 | Not Found | Not Found | Not Found | Not Found | High      | High      | High      | High      |          |          |          | 21512775 |          |          | 4.12     | 1     | 49  | 1  |   |
| FALSE | None                     | 50301238  | glutathione reductase, mitochondrial isoform 1 precursor [Homo sapiens]   | 6  | 2 | 8  | 2 | 1 | 522  | 56.2  | 8.5  | High      | 6456399  | 7851695  | 9514912  | 34228430 |          |          | 4.75     | 2     | 26  | 2  |   |
| FALSE | Master Protein Candidate | 305410789 | glutathione reductase, mitochondrial isoform 2 precursor [Homo sapiens]   | 35 | 6 | 2  | 2 | 1 | 493  | 53    | 8.81 | High      | 6456399  | 7851695  | 9514912  | 34228430 |          |          | 4.75     | 2     | 26  | 2  |   |
| FALSE | None                     | 305410781 | glutathione reductase, mitochondrial isoform 1 precursor [Homo sapiens]   | 35 | 6 | 2  | 2 | 1 | 440  | 47.2  | 8.74 | High      | 6456399  | 7851695  | 9514912  | 34228430 |          |          | 4.75     | 2     | 26  | 2  |   |
| FALSE | Master Protein Candidate | 305410793 | glutathione reductase, mitochondrial isoform 3 precursor [Homo sapiens]   | 6  | 2 | 8  | 2 | 1 | 469  | 50.5  | 8.34 | High      | 6456399  | 7851695  | 9514912  | 34228430 |          |          | 4.75     | 2     | 26  | 2  |   |
| FALSE | Master Protein           | 46276863  | parathyroidin [Homo sapiens]                                              | 11 | 1 | 10 | 1 | 1 | 102  | 11.5  | 4.16 | High      | 8479986  | 882300   | 892135   | 33592925 | 28421626 | 13.35    | 1        | 144   | 1   |    |   |
| FALSE | Master Protein Candidate | 559595921 | heterogeneous nuclear ribonucleoprotein A/B isoform 1 [Homo sapiens]      | 8  | 2 | 24 | 2 | 1 | 285  | 30.8  | 4.75 | High      | 5468799  | 5708472  | 54669179 | 1.52E+08 | 1.54E+08 | 1.53E+08 | 28.61    | 2     | 107 | 2  |   |
| FALSE | Master Protein           | 559595919 | heterogeneous nuclear ribonucleoprotein A/B isoform 2 [Homo sapiens]      | 7  | 2 | 24 | 2 | 1 | 332  | 35.9  | 6.95 | High      | 5468799  | 5708472  | 54669179 | 1.52E+08 | 1.54E+08 | 1.53E+08 | 28.61    | 2     | 107 | 2  |   |
| FALSE | None                     | 217272890 | palmitoyl-protein thioesterase 1 isoform 2 precursor [Homo sapiens]       | 7  | 1 | 4  | 1 | 1 | 203  | 23.1  | 5.97 | High      | High      | Not Found | High      | High      | High      | Not Found | Not Found | 54606955 |          |          | 1.2E+08  |          |          | 4.12     | 1     | 36  | 1  |   |
| FALSE | None                     | 53032927  | PREDICTED: palmitoyl-protein thioesterase 1 isoform X2 [Homo sapiens]     | 5  | 1 | 4  | 1 | 1 | 282  | 31.3  | 6.52 | Not Found | High      |          |          |          |          |          |          | 4.12     | 1     | 49  | 1  |   |
| FALSE | None                     | 53032929  | PREDICTED: palmitoyl-protein thioesterase 1 isoform X1 [Homo sapiens]     | 5  | 1 | 4  | 1 | 1 | 339  | 37.6  | 3.91 | Not Found | High      |          |          |          |          |          |          | 4.12     | 1     | 49  | 1  |   |
| FALSE | Master Protein           | 4506031   | palmitoyl-protein thioesterase 1 isoform 1 precursor [Homo sapiens]       | 5  | 9 | 2  | 8 | 2 | 306  | 34.2  | 6.52 | High      | 54606955 |          |          | 1.2E+08  |          |          | 4.12     | 1     | 66  | 2  |   |
| FALSE | Master Protein Candidate | 42472626  | tropomyosin beta chain isoform 1 [Homo sapiens]                           | 8  | 4 | 36 | 2 | 1 | 284  | 32.8  | 4.71 | High      | 27673000 | 26308014 | 22379050 | 67428227 | 58113519 | 48.78    | 4        | 157   | 4   |    |   |
| FALSE | Master Protein           | 530391019 | PREDICTED: tropomyosin beta chain isoform X1 [Homo sapiens]               | 7  | 4 | 36 | 2 | 1 | 303  | 34.1  | 5.1  | High      | 27673000 | 26308014 | 22379050 | 67428227 | 58113519 | 48.78    | 4        | 157   | 4   |    |   |
| FALSE | Master Protein Candidate | 578813543 | PREDICTED: tropomyosin alpha 4 chain isoform X2 [Homo sapiens]            | 8  | 4 | 36 | 2 | 1 | 284  | 32.8  | 4.71 | High      | 27673000 | 26308014 | 22379050 | 67428227 | 58113519 | 48.78    | 4        | 157   | 4   |    |   |
| FALSE | Master Protein Candidate | 530390127 | PREDICT                                                                   |    |   |    |   |   |      |       |      |           |           |           |           |           |           |           |           |          |          |          |          |          |          |          |       |     |    |   |





|       |                          |    |           |                                                                                               |    |    |     |    |   |      |       |      |           |           |           |           |           |          |          |          |          |          |          |        |     |     |    |
|-------|--------------------------|----|-----------|-----------------------------------------------------------------------------------------------|----|----|-----|----|---|------|-------|------|-----------|-----------|-----------|-----------|-----------|----------|----------|----------|----------|----------|----------|--------|-----|-----|----|
| FALSE | None                     | 71 | 578827359 | PREDICTED: tropomyosin alpha-1 chain isoform X21 [Homo sapiens]                               | 6  | 1  | 9   | 1  | 1 | 161  | 18.7  | 4.78 | High      | High      | Not Found | High      | High      | 1.33E+08 | 1.33E+08 | 1.33E+08 | 3.44E+08 | 3.21E+08 | 10.19    | 1      | 47  | 1   |    |
| FALSE | None                     | 71 | 6252506   | tropomyosin alpha-1 chain isoform 7 [Homo sapiens]                                            | 7  | 3  | 25  | 1  | 1 | 284  | 32.8  | 4.75 | High      | High      | Not Found | High      | High      | 1.33E+08 | 1.33E+08 | 1.33E+08 | 3.44E+08 | 3.21E+08 | 29.4     | 3      | 106 | 3   |    |
| FALSE | None                     | 71 | 53040414  | PREDICTED: tropomyosin alpha-1 chain isoform X16 [Homo sapiens]                               | 8  | 3  | 25  | 1  | 1 | 248  | 28.7  | 4.75 | High      | High      | Not Found | High      | High      | 1.33E+08 | 1.33E+08 | 1.33E+08 | 3.44E+08 | 3.21E+08 | 29.4     | 3      | 106 | 3   |    |
| FALSE | None                     | 71 | 530406398 | PREDICTED: tropomyosin alpha-1 chain isoform X8 [Homo sapiens]                                | 7  | 3  | 25  | 1  | 1 | 284  | 32.6  | 4.75 | High      | High      | Not Found | High      | High      | 1.33E+08 | 1.33E+08 | 1.33E+08 | 3.44E+08 | 3.21E+08 | 29.4     | 3      | 106 | 3   |    |
| FALSE | None                     | 71 | 530406399 | PREDICTED: tropomyosin alpha-1 chain isoform X5 [Homo sapiens]                                | 7  | 3  | 25  | 1  | 1 | 287  | 32.9  | 4.77 | High      | High      | Not Found | High      | High      | 1.33E+08 | 1.33E+08 | 1.33E+08 | 3.44E+08 | 3.21E+08 | 29.4     | 3      | 106 | 3   |    |
| FALSE | None                     | 71 | 6252502   | tropomyosin alpha-1 chain isoform 2 [Homo sapiens]                                            | 7  | 3  | 25  | 1  | 1 | 284  | 32.7  | 4.74 | High      | High      | Not Found | High      | High      | 1.33E+08 | 1.33E+08 | 1.33E+08 | 3.44E+08 | 3.21E+08 | 29.4     | 3      | 106 | 3   |    |
| FALSE | None                     | 71 | 114155140 | tropomyosin alpha-1 chain isoform 1 [Homo sapiens]                                            | 11 | 5  | 49  | 3  | 1 | 265  | 32.9  | 4.65 | High      | High      | Not Found | High      | High      | 1.15E+08 | 1.18E+08 | 1.08E+08 | 1.94E+08 | 2.5E+08  | 65.86    | 5      | 248 | 5   |    |
| FALSE | None                     | 71 | 530406386 | PREDICTED: tropomyosin alpha-1 chain isoform X2 [Homo sapiens]                                | 6  | 3  | 25  | 1  | 1 | 326  | 37.4  | 4.72 | High      | High      | Not Found | High      | High      | 1.33E+08 | 1.33E+08 | 1.33E+08 | 3.44E+08 | 3.21E+08 | 29.4     | 3      | 106 | 3   |    |
| FALSE | None                     | 71 | 578801441 | PREDICTED: tropomyosin alpha-1 chain isoform X3 [Homo sapiens]                                | 11 | 5  | 49  | 3  | 1 | 285  | 33.1  | 4.74 | High      | High      | High      | High      | High      | 1.15E+08 | 1.18E+08 | 1.08E+08 | 1.84E+08 | 2.5E+08  | 65.86    | 5      | 248 | 5   |    |
| FALSE | None                     | 71 | 530406380 | PREDICTED: tropomyosin alpha-1 chain isoform X3 [Homo sapiens]                                | 7  | 3  | 25  | 1  | 1 | 248  | 32.9  | 4.79 | High      | High      | Not Found | High      | High      | 1.33E+08 | 1.33E+08 | 1.33E+08 | 3.44E+08 | 3.21E+08 | 29.4     | 3      | 106 | 3   |    |
| FALSE | None                     | 71 | 578801437 | PREDICTED: tropomyosin alpha-1 chain isoform X1 [Homo sapiens]                                | 14 | 6  | 58  | 4  | 1 | 285  | 33.2  | 4.77 | High      | High      | High      | High      | High      | 98975047 | 97397673 | 92315982 | 1.33E+08 | 2.5E+08  | 2.03E+08 | 72.18  | 6   | 256 | 6  |
| FALSE | None                     | 71 | 530406408 | PREDICTED: tropomyosin alpha-1 chain isoform X13 [Homo sapiens]                               | 8  | 3  | 25  | 1  | 1 | 248  | 28.6  | 4.77 | High      | High      | Not Found | High      | High      | 1.33E+08 | 1.33E+08 | 1.33E+08 | 3.44E+08 | 3.21E+08 | 29.4     | 3      | 106 | 3   |    |
| FALSE | Master Protein           | 72 | 4507509   | metalloproteinase inhibitor 1 precursor [Homo sapiens]                                        | 10 | 2  | 13  | 2  | 1 | 207  | 23.2  | 8.1  | High      | High      | High      | Not Found | Not Found | 4.27E+08 | 4.23E+08 | 94463469 |          |          | 13.17    | 2      | 36  | 2   |    |
| FALSE | Master Protein           | 73 | 10861955  | phosphoserine aminotransferase isoform 2 [Homo sapiens]                                       | 3  | 1  | 9   | 1  | 1 | 324  | 32.9  | 6.56 | High      | High      | High      | High      | High      | 41895737 | 40734311 | 43789922 | 93750378 | 86777199 | 89636307 | 10.90  | 1   | 58  | 1  |
| FALSE | Master Protein           | 73 | 17402893  | phosphoserine aminotransferase isoform 1 [Homo sapiens]                                       | 6  | 2  | 19  | 2  | 1 | 370  | 40.4  | 7.66 | High      | High      | High      | High      | High      | 27593312 | 26316949 | 43789922 | 66153862 | 69550061 | 64055649 | 21.81  | 2   | 83  | 2  |
| FALSE | Master Protein           | 74 | 45061881  | proteasome subunit alpha type 2 [Homo sapiens]                                                | 6  | 1  | 8   | 1  | 1 | 234  | 25.9  | 7.43 | Not Found | High      | Not Found | High      | High      | 21723025 |          | 50730933 | 57848307 | 48660967 | 8.13     | 1      | 0   | 1   |    |
| FALSE | Master Protein Candidate | 75 | 221316614 | extracellular matrix protein 1 isoform 1 precursor [Homo sapiens]                             | 4  | 9  | 35  | 4  | 1 | 540  | 60.6  | 6.71 | High      | High      | High      | High      | High      | 1.32E+08 | 1.38E+08 | 1.34E+08 | 4.16E+08 | 3.22E+08 | 3.97E+08 | 39.11  | 4   | 256 | 4  |
| FALSE | Master Protein           | 75 | 221316615 | extracellular matrix protein 1 isoform 2 precursor [Homo sapiens]                             | 7  | 2  | 15  | 2  | 1 | 425  | 46.1  | 6.39 | High      | High      | High      | High      | High      | 1.22E+08 | 1.25E+08 | 1.20E+08 | 5.08E+08 | 4.99E+08 | 4.8E+08  | 34.58  | 2   | 77  | 2  |
| FALSE | Master Protein           | 75 | 323202700 | extracellular matrix protein 1 isoform 3 precursor [Homo sapiens]                             | 8  | 4  | 35  | 4  | 1 | 567  | 63.5  | 6.89 | High      | High      | High      | High      | High      | 1.32E+08 | 1.38E+08 | 1.34E+08 | 4.16E+08 | 3.22E+08 | 3.97E+08 | 39.11  | 4   | 256 | 4  |
| FALSE | Master Protein Candidate | 76 | 530372119 | PREDICTED: flamin-B isoform X1 [Homo sapiens]                                                 | 12 | 22 | 146 | 18 | 1 | 2622 | 280.2 | 5.69 | High      | High      | High      | High      | High      | 41598473 | 41295764 | 45494656 | 99322151 | 96308586 | 95297781 | 156.04 | 20  | 975 | 21 |
| FALSE | Master Protein Candidate | 76 | 256222413 | flamin-B isoform 3 [Homo sapiens]                                                             | 12 | 22 | 146 | 18 | 1 | 2591 | 276.8 | 5.71 | High      | High      | High      | High      | High      | 41598473 | 41295764 | 45494656 | 99322151 | 96308586 | 95297781 | 156.04 | 20  | 975 | 21 |
| FALSE | None                     | 76 | 530372120 | PREDICTED: flamin-B isoform X6 [Homo sapiens]                                                 | 11 | 18 | 121 | 14 | 1 | 2177 | 223.6 | 5.53 | High      | High      | High      | High      | High      | 41598473 | 41295764 | 41847271 | 99322151 | 96308586 | 95297781 | 124.86 | 17  | 853 | 17 |
| FALSE | Master Protein Candidate | 76 | 109990544 | flamin-B isoform 2 [Homo sapiens]                                                             | 12 | 22 | 146 | 18 | 1 | 2602 | 278   | 5.73 | High      | High      | High      | High      | High      | 41598473 | 41295764 | 45494656 | 99322151 | 96308586 | 95297781 | 156.04 | 20  | 975 | 21 |
| FALSE | Master Protein Candidate | 76 | 530372121 | PREDICTED: flamin-B isoform X2 [Homo sapiens]                                                 | 12 | 22 | 146 | 18 | 1 | 2609 | 279   | 5.77 | High      | High      | High      | High      | High      | 41598473 | 41295764 | 45494656 | 99322151 | 96308586 | 95297781 | 156.04 | 20  | 975 | 21 |
| FALSE | Master Protein           | 76 | 256222411 | flamin-B isoform 1 [Homo sapiens]                                                             | 12 | 22 | 146 | 18 | 1 | 2633 | 281.5 | 5.71 | High      | High      | High      | High      | High      | 41598473 | 41295764 | 45494656 | 99322151 | 96308586 | 95297781 | 156.04 | 20  | 975 | 21 |
| FALSE | Master Protein           | 76 | 578805877 | PREDICTED: flamin-B isoform X7 [Homo sapiens]                                                 | 11 | 18 | 121 | 14 | 1 | 2169 | 225.9 | 5.69 | High      | High      | High      | High      | High      | 41598473 | 41295764 | 45494656 | 99322151 | 96308586 | 95297781 | 156.04 | 18  | 975 | 19 |
| FALSE | Master Protein Candidate | 76 | 256222415 | flamin-B isoform 4 [Homo sapiens]                                                             | 12 | 22 | 146 | 18 | 1 | 2578 | 275.5 | 5.78 | High      | High      | High      | High      | High      | 41598473 | 41295764 | 45494656 | 99322151 | 96308586 | 95297781 | 156.04 | 20  | 975 | 21 |
| FALSE | None                     | 76 | 530372127 | PREDICTED: flamin-B isoform X5 [Homo sapiens]                                                 | 11 | 18 | 121 | 14 | 1 | 2181 | 234.1 | 5.53 | High      | High      | High      | High      | High      | 41598473 | 41295764 | 41847271 | 99322151 | 96308586 | 95297781 | 124.86 | 17  | 853 | 17 |
| FALSE | None                     | 76 | 188595687 | flamin-C isoform B [Homo sapiens]                                                             | 1  | 3  | 16  | 0  | 2 | 2692 | 287.1 | 5.97 | Not Found |          |          |          |          |          |          | 16.32  | 3   | 124 | 3  |
| FALSE | None                     | 76 | 578814606 | PREDICTED: flamin-C isoform X1 [Homo sapiens]                                                 | 1  | 3  | 16  | 0  | 2 | 2633 | 281.4 | 6.04 | Not Found |          |          |          |          |          |          | 16.32  | 3   | 124 | 3  |
| FALSE | None                     | 76 | 118805322 | flamin-C isoform A [Homo sapiens]                                                             | 1  | 3  | 16  | 0  | 2 | 2725 | 290.8 | 5.97 | Not Found |          |          |          |          |          |          | 16.32  | 3   | 124 | 3  |
| FALSE | Master Protein           | 77 | 19913412  | major vault protein [Homo sapiens]                                                            | 1  | 1  | 2   | 1  | 1 | 893  | 99.3  | 5.48 | Not Found | High      | Not Found | Not Found | Not Found |          |          |          |          |          |          | 0      | 1   | 0   | 1  |
| FALSE | Master Protein Candidate | 78 | 578808041 | PREDICTED: heparanase-derived growth factor isoform X2 [Homo sapiens]                         | 28 | 2  | 89  | 2  | 1 | 130  | 13.7  | 9.51 | High      | High      | High      | High      | High      | 49742035 | 67472327 | 63781927 | 1.07E+08 | 1.12E+08 | 1.07E+08 | 16.27  | 2   | 60  | 2  |
| FALSE | Master Protein Candidate | 78 | 4785516   | heparanase-derived growth factor isoform 1 [Homo sapiens]                                     | 14 | 19 | 2   | 1  | 1 | 240  | 26.8  | 4.78 | High      | High      | High      | High      | High      | 49742035 | 67472327 | 63781927 | 1.07E+08 | 1.12E+08 | 1.07E+08 | 16.27  | 2   | 60  | 2  |
| FALSE | Master Protein Candidate | 78 | 578808042 | PREDICTED: heparanase-derived growth factor isoform X1 [Homo sapiens]                         | 24 | 2  | 19  | 2  | 1 | 136  | 15.1  | 9.82 | High      | High      | High      | High      | High      | 49742035 | 67472327 | 63781927 | 1.07E+08 | 1.12E+08 | 1.07E+08 | 16.27  | 2   | 60  | 2  |
| FALSE | Master Protein           | 78 | 186928819 | heparanase-derived growth factor isoform 1 [Homo sapiens]                                     | 13 | 2  | 19  | 2  | 1 | 256  | 28.2  | 4.79 | High      | High      | High      | High      | High      | 49742035 | 67472327 | 63781927 | 1.07E+08 | 1.12E+08 | 1.07E+08 | 16.27  | 2   | 60  | 2  |
| FALSE | Master Protein Candidate | 78 | 186928821 | heparanase-derived growth factor isoform 1 [Homo sapiens]                                     | 14 | 2  | 19  | 2  | 1 | 233  | 25.5  | 4.53 | High      | High      | High      | High      | High      | 49742035 | 67472327 | 63781927 | 1.07E+08 | 1.12E+08 | 1.07E+08 | 16.27  | 2   | 60  | 2  |
| FALSE | Master Protein           | 78 | 53031656  | PREDICTED: actin-related protein 2/3 complex subunit 5 like protein isoform X1 [Homo sapiens] | 8  | 1  | 12  | 16 | 1 | 153  | 16.8  | 6.15 | High      | High      | High      | High      | High      | 12239120 | 15252222 | 48984483 | 38618280 | 45884847 | 44725936 | 17.69  | 1   | 60  | 1  |
| FALSE | Master Protein           | 8  | 38455402  | neuropilin gelatinase-associated lipocalin precursor [Homo sapiens]                           | 14 | 2  | 26  | 2  | 1 | 198  | 22.6  | 8.91 | High      | High      | High      | High      | High      | 1.63E+08 | 1.73E+08 | 1.54E+08 | 1.08E+08 | 99610542 | 1.15E+08 | 45.71  | 2   | 419 | 2  |
| FALSE | Master Protein           | 80 | 42560237  | poliovirus receptor-related protein 1 isoform 1 precursor [Homo sapiens]                      | 5  | 2  | 14  | 2  | 1 | 517  | 57.1  | 6.1  | High      | High      | Not Found | High      | High      | 32115062 | 3802502  |          | 45509761 | 47234043 | 39520730 | 17.77  | 2   | 141 | 2  |
| FALSE | Master Protein Candidate | 80 | 42560238  | poliovirus receptor-related protein 1 isoform 1 precursor [Homo sapiens]                      | 8  | 2  | 14  | 2  | 1 | 352  | 39.1  | 8.46 | High      | High      | Not Found | High      | High      | 32115062 | 3802502  |          | 45509761 | 47234043 | 39520730 | 17.77  | 2   | 141 | 2  |
| FALSE | Master Protein Candidate | 80 | 42560231  | poliovirus receptor-related protein 1 isoform 2 precursor [Homo sapiens]                      | 6  | 2  | 14  | 2  | 1 | 458  | 50.7  | 6.87 | High      | High      | Not Found | High      | High      | 32115062 | 3802502  |          | 45509761 | 47234043 | 39520730 | 17.77  | 2   | 141 | 2  |
| FALSE | Master Protein Candidate | 81 | 343168770 | CD166 antigen isoform 2 precursor [Homo sapiens]                                              | 2  | 1  | 6   | 1  | 1 | 570  | 63.6  | 7.31 | High      | High      | Not Found | Not Found | Not Found | 12017851 | 11715312 | 13903165 |          |          |          | 6.71   | 1   | 37  | 1  |
| FALSE | Master Protein Candidate | 81 | 343168776 | CD166 antigen isoform 4 precursor [Homo sapiens]                                              | 8  | 1  | 6   | 1  | 1 | 133  | 15.1  | 8.13 | High      | High      | Not Found | Not Found | Not Found | 12017851 | 11715312 | 13903165 |          |          |          | 6.71   | 1   | 37  | 1  |
| FALSE | Master Protein           | 81 | 6816411   | CD166 antigen isoform 1 precursor [Homo sapiens]                                              | 2  | 1  | 6   | 1  | 1 | 583  | 65.1  | 6.25 | High      | High      | Not Found | Not Found | Not Found | 12017851 | 11715312 | 13903165 |          |          |          | 6.71   | 1   | 37  | 1  |
| FALSE | Master Protein Candidate | 81 | 343168772 | CD166 antigen isoform 3 precursor [Homo sapiens]                                              | 2  | 1  | 6   | 1  | 1 | 555  | 61.9  | 6.19 | High      | High      | Not Found | Not Found | Not Found | 12017851 | 11715312 | 13903165 |          |          |          | 6.71   | 1   | 37  | 1  |
| FALSE | Master Protein           | 82 | 4507467   | transforming growth factor-beta-induced protein ig-h3 precursor [Homo sapiens]                | 9  | 5  | 27  | 5  | 1 | 683  | 74.6  | 7.71 | High      | High      | High      | High      | High      | 41072758 | 39732564 | 47635017 | 68815978 | 88408759 | 84622794 | 31.35  | 5   | 128 | 4  |
| FALSE | Master Protein           | 83 | 11050644  | inorganic pyrophosphatase [Homo sapiens]                                                      | 14 | 3  | 26  | 3  | 1 | 289  | 32.6  | 5.86 | High      | High      | High      | High      | High      | 28888471 | 33502762 | 31162737 | 59339357 | 50541061 | 64268172 | 46.04  | 3   | 224 | 3  |
| FALSE | Master Protein Candidate | 84 | 5031595   | actin-related protein 2/3 complex subunit 4 isoform A [Homo sapiens]                          | 7  | 1  | 2   | 1  | 1 | 168  | 19.7  | 8.43 | High      | High      | Not Found | Not Found | Not Found | 34018330 |          |          |          |          |          | 1.95   | 1   | 27  | 1  |
| FALSE | Master Protein Candidate | 84 | 311771647 | actin-related protein 2/3 complex subunit 4 isoform C [Homo sapiens]                          | 6  | 1  | 2   | 1  | 1 | 187  | 21.6  | 8.59 | High      | High      | Not Found | Not Found | Not Found | 34018330 |          |          |          |          |          | 1.95   | 1   | 27  | 1  |
| FALSE | Master Protein           | 84 | 311771694 | ARPC4-TLL3 fusion protein [Homo sapiens]                                                      | 2  | 1  | 2   | 1  | 1 | 625  | 71.7  | 5.88 | High      | High      |           |           |           |          |          |          |          |          |          |        |     |     |    |

**Supplementary Table 2:** List of differentially expressed proteins upon MYB modulation in MiaPaCa and BxPC3

| <b>MiaPaCa (Scr vs shMYB)</b> |               |
|-------------------------------|---------------|
| <b>Expr Fold Change</b>       | <b>Symbol</b> |
| -10.794                       | ACTA1         |
| 5606982                       | ACTBL2        |
| -9.275                        | ACTG1         |
| -5.148                        | ACTN1         |
| -8.906                        | ACTN4         |
| 2.87                          | ADAM10        |
| 23.22                         | ADAMTSL1      |
| -17.322                       | AHCY          |
| -33.23                        | AHNAK         |
| -30.35                        | AKR1C1/AKR1C2 |
| -55.617                       | ALCAM         |
| -93478.8                      | ALDH1A1       |
| -4.547                        | ALDOA         |
| -9.157                        | ANP32A        |
| -9386.69                      | ANXA1         |
| -71.797                       | ANXA2         |
| -1.2E+12                      | ANXA5         |
| -5.39                         | APLP2         |
| -16.709                       | ARHGDI A      |
| 1172597                       | ARHGDI B      |
| -37.776                       | ARPC3         |
| 4.62                          | B4GALT1       |
| -4.887                        | BCAM          |
| -5.364                        | BSG           |
| -4.071                        | BTF3          |
| 2.05                          | C1R           |
| -83.932                       | C3            |
| -19.662                       | CACYBP        |
| -10.284                       | CALB2         |
| -5.385                        | CALR          |
| 2.51                          | CANT1         |
| -20.575                       | CAP1          |
| -6.387                        | CAPZA1        |
| -18.539                       | CAPZA2        |
| -11.469                       | CAPZB         |
| -10.704                       | CBR1          |
| -4.406                        | CBX3          |

|          |         |
|----------|---------|
| -11.239  | CCT6A   |
| -11.935  | CD109   |
| -4.995   | CD44    |
| -4.909   | CDC37   |
| -7.64    | CDH1    |
| -111.532 | CELA3A  |
| -8.369   | CFL1    |
| -8.377   | CFL2    |
| -13.015  | CLIC1   |
| 21.44    | CLSTN3  |
| -9.689   | CLU     |
| -4.477   | CNN2    |
| -4.508   | COL6A2  |
| -28.12   | COL7A1  |
| -11.72   | COTL1   |
| -4.145   | CP      |
| -8.5E+11 | CPA4    |
| 2.98     | CTNNA1  |
| -18.657  | CTSA    |
| -18.294  | CTSB    |
| -19.446  | CTSD    |
| -13.717  | CTSH    |
| -14.193  | CTSL    |
| -5.946   | CTSZ    |
| -12.126  | CYCS    |
| -16.39   | DBI     |
| -4.427   | DDT     |
| -17.749  | DDX39B  |
| -4.698   | DEK     |
| -136.776 | DNAJB11 |
| -12.676  | DNASE2  |
| -743.63  | DSG2    |
| -66.102  | DSP     |
| -14.202  | DSTN    |
| -11.77   | ECM1    |
| -7.096   | EEF1A1  |
| -11.854  | EEF1B2  |
| -7.293   | EEF1D   |
| -5.932   | EEF1G   |
| -6.778   | EEF2    |
| -4.687   | EFHD2   |
| -4.233   | EFNB1   |
| -15.363  | EIF4A2  |
| -7.169   | ENO1    |
| -4.231   | ENO3    |

|          |                       |
|----------|-----------------------|
| -5.194   | ERP44                 |
| -4.971   | EZR                   |
| -11.543  | FAM3C                 |
| 2.74     | FBLN1                 |
| 3.04     | FBLN1                 |
| 545803.5 | FGFBP1                |
| -4.02    | FKBP1A                |
| -8.963   | FLNB                  |
| -11.304  | FSCN1                 |
| -8.488   | GAPDH                 |
| -38.798  | GARS                  |
| -4.605   | GDF15                 |
| -6.31    | GDI2                  |
| -16.48   | GGCT                  |
| -13.207  | GLA                   |
| -7.495   | GLG1                  |
| -8.406   | GLO1                  |
| -8.616   | GOT1                  |
| -8.281   | GOT2                  |
| -11.18   | GPI                   |
| -4.547   | GSN                   |
| -10.824  | GSTO1                 |
| -8.439   | GSTP1                 |
| -100.134 | H6PD                  |
| -12.085  | HDGF                  |
| -1.7E+12 | HEXA                  |
| -5.139   | HEXB                  |
| -5.748   | HIST1H1B              |
| -4.133   | HIST1H1D              |
| -38.64   | HIST1H2BB             |
| -4.22    | HIST1H2BD             |
| -6.823   | HIST1H3A              |
| -17.945  | HIST2H2AA3/HIST2H2AA4 |
| 408941.5 | HIST2H2AB             |
| -9.524   | HIST2H4A              |
| -11.079  | HIST3H2A              |
| 2.11     | HLA-B                 |
| -8.54    | HMGA1                 |
| -5.993   | HMGA1                 |
| -2.1E+11 | HMGA2                 |
| -24.726  | HMGB1                 |
| -6.813   | HNRNPA2B1             |
| -5.351   | HNRNPA3               |
| -6.506   | HNRNPAB               |
| -5.614   | HNRNPC                |

|          |               |
|----------|---------------|
| -11.827  | HNRNPD        |
| -8.176   | HNRNPK        |
| -4.014   | HNRNPL        |
| -12.352  | HPRT1         |
| -6.966   | HS3ST1        |
| -19.208  | HSP90AA1      |
| -9.773   | HSP90AB1      |
| -4.215   | HSP90B1       |
| -4.802   | HSPA1A/HSPA1B |
| -8.798   | HSPA4         |
| -6.125   | HSPA5         |
| -20.221  | HSPB1         |
| -11.703  | HSPD1         |
| -8.507   | HSPH1         |
| 2.41     | HTRA1         |
| -5.628   | IGF2R         |
| 2.47     | IGFBP2        |
| -4.143   | IGFBP6        |
| 550392   | IL1RL1        |
| -1.8E+13 | INHBA         |
| -237.079 | ITGB1         |
| -2.9E+12 | ITGB4         |
| 14.67    | JAG1          |
| -6.64    | KHSRP         |
| 2.61     | KLK6          |
| 2.45     | KRT1          |
| -11.454  | KRT16         |
| -22.652  | KRT17         |
| -43.912  | KRT18         |
| -20.792  | KRT19         |
| 1173218  | KRT2          |
| 787786.4 | KRT5          |
| -8.107   | KRT7          |
| -38.882  | KRT8          |
| 3.18     | KRT9          |
| 248143.8 | KYNU          |
| -35.714  | LAMA3         |
| -4.234   | LAMB1         |
| 7.63     | LCN2          |
| -16.962  | LCPI          |
| -15.195  | LDHA          |
| -4.146   | LDHB          |
| -6.232   | LGALS1        |
| 3.89     | LGALS3BP      |
| -5.233   | LGMN          |

|          |            |
|----------|------------|
| -9.932   | LMNA       |
| -4.371   | LMNB1      |
| -30.074  | LMNB2      |
| -10.02   | LRG1       |
| -4.406   | LRRC59     |
| -4.261   | MAPRE1     |
| -4.281   | MARCKS     |
| -7.74    | MDH1       |
| 2.93     | MINPP1     |
| -6.787   | MSN        |
| -65.382  | MVP        |
| -5.605   | NACA       |
| -2636.3  | NAMPT      |
| -8.347   | NASP       |
| -8.274   | NCL        |
| -11.024  | NECTIN1    |
| 689900.2 | NECTIN1    |
| -10.948  | NEDD8-MDP1 |
| 1295694  | NID2       |
| -4.55    | NME1       |
| -4.551   | NME1-NME2  |
| -71.643  | NQO1       |
| -14.209  | NT5E       |
| -23.197  | NUDT21     |
| -4.259   | OAF        |
| -9.799   | OLA1       |
| -1724.25 | OSMR       |
| -14.978  | PA2G4      |
| -16.627  | PABPC1     |
| -11.379  | PARK7      |
| -10.349  | PARP1      |
| -4.945   | PCBP1      |
| -54850   | PCDH1      |
| 997552.9 | PCDH7      |
| 15.35    | PCSK9      |
| -52.577  | PDCD5      |
| -4.358   | PDCD6IP    |
| -14.582  | PDIA4      |
| -6.638   | PDIA6      |
| -4.521   | PEBP1      |
| -5.166   | PFN1       |
| -4.989   | PGAM1      |
| -11.878  | PGD        |
| -5.513   | PGK1       |
| -9.252   | PGLS       |

|          |        |
|----------|--------|
| -8.758   | PKM    |
| -177.778 | PLAT   |
| -5.949   | PLEC   |
| -4.981   | PLOD1  |
| -181.583 | PLOD3  |
| -72.048  | PLS3   |
| -7.25    | PLTP   |
| -7.581   | PNP    |
| -10.021  | PPA1   |
| -16.805  | PPIA   |
| -13.587  | PPL    |
| -16.758  | PRCP   |
| -11.116  | PRDX1  |
| -7.056   | PRDX2  |
| 742674.8 | PRDX5  |
| -6.991   | PRDX6  |
| -9.96    | PRKCSH |
| -5.198   | PRSS22 |
| -96.599  | PSAP   |
| -17.009  | PSAT1  |
| -6.934   | PSMA1  |
| -10.056  | PSMA2  |
| -8.203   | PSMA6  |
| -5.394   | PSMA7  |
| -4.618   | PSMB1  |
| -12.274  | PSMB4  |
| -9.333   | PSMB5  |
| -15.377  | PSMB6  |
| -19.541  | PSME1  |
| -22.687  | PSME2  |
| -14.429  | PTBP1  |
| -4.295   | PTK7   |
| -5.849   | PTPRF  |
| -90534   | PTX3   |
| -60.313  | PYGB   |
| 2.57     | QSOX2  |
| -5.439   | RAB11A |
| -9.181   | RAB7A  |
| -19.162  | RACK1  |
| -4.393   | RAN    |
| -5.176   | RBMX   |
| -8.878   | RDX    |
| -15.896  | RNH1   |
| -16.69   | RPLP0  |
| -6.075   | RPLP2  |

|          |          |
|----------|----------|
| -14.679  | RPS13    |
| -29.903  | RPS3     |
| -61.917  | S100A10  |
| -11.566  | S100A11  |
| -4.632   | S100A4   |
| -4.6E+12 | S100P    |
| -3.7E+12 | SEMA3B   |
| 4.5      | SEMA4B   |
| 34.11    | SERPINA1 |
| -4326.43 | SERPINA3 |
| 798920.4 | SERPINB2 |
| 288976.7 | SERPINB5 |
| -1899.45 | SERPINB9 |
| -32.948  | SERPINE1 |
| -1.1E+13 | SERPINE2 |
| -11.599  | SERPINH1 |
| -4.423   | SET      |
| 232083.6 | SFN      |
| -112.141 | SFPQ     |
| -52.588  | SLC9A3R1 |
| -4.826   | SNRPB    |
| -5.3     | SOD1     |
| -4.117   | SPTAN1   |
| -17.327  | SRSF1    |
| -4.002   | SRSF3    |
| -10.452  | SSB      |
| -5.519   | SSBP1    |
| -5.92    | ST13     |
| 53.44    | STC1     |
| -10.127  | STIP1    |
| -9.733   | STMN1    |
| -18.463  | SUB1     |
| -4.932   | SUMO2    |
| -5.421   | SYNCRIP  |
| -10.789  | TAGLN2   |
| -13.284  | TALDO1   |
| -8.143   | TBCA     |
| -7.3E+12 | TES      |
| -5.07    | TFG      |
| -4.587   | TFPI     |
| -4.208   | TFRC     |
| 4.05     | TGFB1    |
| -13.737  | TGFBI    |
| -18.368  | TGFBR3   |
| -26.118  | TINAGL1  |



|          |                |
|----------|----------------|
| -27.338  | TKT            |
| -4.168   | TMEM189-UBE2V1 |
| -6.713   | TMSB10/TMSB4X  |
| -21.344  | TNFRSF6B       |
| -4.756   | TPI1           |
| -5.699   | TPM3           |
| -6.112   | TPT1           |
| -8.4E+11 | TRA2B          |
| -13.131  | TUBA1B         |
| -27.35   | TUBB           |
| -12.048  | TUBB4B         |
| -25.58   | TXNDC12        |
| -4.873   | TXNDC17        |
| -13.709  | TXNDC5         |
| -6.509   | TXNRD1         |
| -157.112 | UAP1           |
| -17.235  | UBA1           |
| -8.706   | UBE2N          |
| -4.68    | VAPA           |
| -5.225   | VCL            |
| -4.368   | VCP            |
| -13.228  | VIM            |
| -6.3E+13 | WARS           |
| -10.966  | XRCC6          |
| -18.865  | YWHAB          |
| -10.479  | YWHAE          |
| -14.632  | YWHAG          |
| -5.7E+13 | YWHAH          |
| -102.089 | YWHAQ          |
| -23.704  | YWHAZ          |

| <b>BxPC3 (Neo vs MYB)</b> |               |
|---------------------------|---------------|
| <b>Expr Fold Change</b>   | <b>Symbol</b> |
| 4.505                     | ACTA1         |
| 18.114                    | ACTBL2        |
| 12.677                    | ACTN1         |
| 3.295                     | ACTN4         |
| -3.409                    | AGR2          |
| 27.815                    | AHCY          |
| 13.441                    | AHNAK         |
| 10.518                    | AHSA1         |
| 2353579                   | AIFM1         |
| 8.098                     | AKR1C1/AKR1C2 |
| 10.287                    | AKR1C3        |
| 3.772                     | ALCAM         |
| 6.009                     | ALDH3A1       |
| 2.259                     | ANP32A        |
| 3.622                     | ANXA1         |
| 2.596                     | ANXA2         |
| 5.635                     | ANXA5         |
| 3.853                     | ARHGDI1       |
| -2.147                    | ATP6AP1       |
| 2.282                     | AXL           |
| 3.047                     | B4GAT1        |
| 3.097                     | BASP1         |
| 2.086                     | BTF3          |
| 6.457                     | C1QBP         |
| -2.186                    | C1R           |
| -2.054                    | C1RL          |
| -12.297                   | C1S           |
| 2.089                     | CACYBP        |
| -2.2E+12                  | CALB2         |
| 2.224                     | CANX          |
| 2.391                     | CAP1          |
| 4.88                      | CAPZA1        |
| 38.231                    | CAPZA2        |
| 7.382                     | CAPZB         |
| 4.468                     | CBR1          |
| 4.524                     | CCT6A         |
| 7.45                      | CD44          |
| 2.365                     | CDC37         |
| -2.205                    | CELA3A        |
| -2.089                    | CFB           |

|         |               |
|---------|---------------|
| -3.383  | CFH           |
| 2.206   | CFL1          |
| 1845433 | CFL2          |
| -8.051  | CKMT1A/CKMT1B |
| -5.614  | CLU           |
| -3.439  | CNPY2         |
| 2.958   | COCH          |
| 2.981   | COL17A1       |
| -19.4   | COL18A1       |
| 2308388 | COL5A2        |
| -37.258 | CPA4          |
| 2.236   | CTNNA1        |
| 3.201   | CTSA          |
| 3.378   | CTSB          |
| 2.652   | CTSZ          |
| 3.926   | DBI           |
| 25.221  | DDX39B        |
| 4.292   | DEK           |
| 2.226   | DNASE2        |
| 3.225   | DSTN          |
| -5.613  | ECM1          |
| 2.469   | EEF1A1        |
| 6.097   | EEF1G         |
| 2.929   | EEF2          |
| 30.683  | EIF4A2        |
| 12.128  | EIF5A         |
| 3.592   | ELAVL1        |
| 2.233   | ENO1          |
| 2.142   | ENO2          |
| 2.534   | ENO3          |
| 8.934   | EPHA4         |
| 2.114   | EPPK1         |
| 3.651   | ERP44         |
| 2.437   | F3            |
| -6.972  | FBLN1         |
| -8.892  | FBLN1         |
| -2.121  | FGFBP1        |
| 2.295   | FKBP4         |
| 2.324   | FLNB          |
| 6.241   | FSCN1         |
| 1.995   | FUBP1         |
| 4.104   | FUCA2         |
| 2.632   | G6PD          |
| 6.431   | GAA           |
| 2.43    | GANAB         |

|          |                   |
|----------|-------------------|
| -2.202   | GARS              |
| -2.784   | GDF15             |
| 5.204    | GDI2              |
| 3.394    | GLA               |
| 2.924    | GLG1              |
| 2.002    | GLO1              |
| 3.407    | GLOD4             |
| -2.154   | GOLM1             |
| 9.824    | GPC1              |
| 3.552    | GPI               |
| 2.452    | GRN               |
| -3.993   | GSN               |
| 2.908    | GSTO1             |
| 3.129    | GSTP1             |
| 2.971    | HACD3             |
| 2.315    | HEXA              |
| 13.881   | HIST1H1B          |
| 4.686    | HIST1H1D          |
| 1.995    | HIST1H2BB         |
| 3.083    | HIST1H2BD         |
| 2.055    | HIST2H4A          |
| -2.9E+15 | HLA-B             |
| 2.36     | HMGB1             |
| 4.537    | HMGB2             |
| 2.262    | HNRNPA1           |
| 3.33     | HNRNPA3           |
| 2.116    | HNRNPAB           |
| 6.419    | HNRNPCL3/HNRNPCL4 |
| 4.899    | HNRNPD            |
| 2.184    | HNRNPH1           |
| 2.056    | HNRNPK            |
| 2.741    | HNRNPR            |
| 2.876    | HNRNPU            |
| 19.256   | HPRT1             |
| 19.551   | HS3ST1            |
| 4.99     | HSP90AA1          |
| 4.435    | HSP90AB1          |
| 2.11     | HSPA1A/HSPA1B     |
| 18.08    | HSPA4             |
| 3.71     | HSPA5             |
| 5.205    | HSPA8             |
| -2.603   | HSPB1             |
| 3.114    | HSPH1             |
| -2.801   | HTRA1             |
| 5.218    | IGF2R             |

|          |            |
|----------|------------|
| -3.097   | IGFBP2     |
| -7.92    | IGFBP5     |
| -2.089   | IGHA1      |
| -2.376   | IL1RL1     |
| 6.518    | ILF2       |
| 4.288    | ILF3       |
| 4.549    | INHBA      |
| 3.966    | ITGB1      |
| 9.36     | ITGB4      |
| -6.146   | KLK10      |
| 2.694    | KLK6       |
| 32.236   | KRT1       |
| 24765714 | KRT14      |
| 30.553   | KRT16      |
| -2.28    | KRT18      |
| 1187691  | KRT2       |
| 7788498  | KRT6B      |
| 2.027    | KRT6C      |
| 17.492   | KRT9       |
| 13.017   | KYNU       |
| 5.124    | LDHA       |
| 2.045    | LDHB       |
| -3.353   | LFNG       |
| 2.106    | LMNB1      |
| 13966972 | LMNB2      |
| -5.354   | LRG1       |
| 6.888    | MAN1B1     |
| 2.04     | MAPRE1     |
| 2.331    | MARCKS     |
| 4.607    | MDH1       |
| 2.165    | NACA       |
| 3.798    | NAMPT      |
| 6.026    | NASP       |
| 3.136    | NCL        |
| 2.175    | NECTIN1    |
| 2.618    | NEDD8-MDP1 |
| -2.067   | NID2       |
| 2.354    | NME1-NME2  |
| 2.128    | NPM1       |
| 4.894    | NQO1       |
| -2.494   | NUCB1      |
| -2.148   | NUCKS1     |
| 2.095    | NUDC       |
| 2.143    | NUDT21     |
| 3.774    | OLA1       |

|          |         |
|----------|---------|
| 31.917   | OSMR    |
| 2.505    | P4HB    |
| 2.78     | PA2G4   |
| 4.389    | PABPC1  |
| 2.505    | PARP1   |
| -2.051   | PCDH7   |
| 3.119    | PCNA    |
| -3.51    | PCSK9   |
| 4.795    | PDCD5   |
| 9.907    | PDCD6IP |
| 2.537    | PFN1    |
| 2.017    | PGAM1   |
| 3.209    | PGK1    |
| 2.049    | PGLS    |
| 2.141    | PKM     |
| 2.715    | PLAT    |
| 4.22     | PLAU    |
| 3.524    | PLOD1   |
| 11.808   | PLS3    |
| 3.367    | PPA1    |
| 5.402    | PPIA    |
| 2.485    | PPIB    |
| -2.4E+13 | PPL     |
| 8.565    | PPT1    |
| 7.955    | PRCP    |
| 8.044    | PRDX1   |
| 2.301    | PRDX2   |
| 2.027    | PRDX6   |
| 2.339    | PRKCSH  |
| 3.182    | PSAP    |
| 25.169   | PSAT1   |
| 2.307    | PSMA1   |
| 4.457    | PSMA6   |
| 2.608    | PSMA7   |
| 2.229    | PSMB1   |
| 6.501    | PSMB2   |
| 2.565    | PSMB4   |
| 7.646    | PSMB5   |
| 961641   | PTGDS   |
| 14.086   | PTK7    |
| 2.81     | PTPRF   |
| 2.116    | PTPRS   |
| 4.336    | PTX3    |
| -2.777   | PYGB    |
| 2.016    | RAB7A   |

|          |                |
|----------|----------------|
| 2.967    | RAD23B         |
| 2.545    | RBMX           |
| 7906017  | RNH1           |
| 3.981    | RPLP0          |
| 2.182    | RPS13          |
| 2.669    | RPS3           |
| 3.476    | S100A2         |
| 2.191    | S100A6         |
| 2.553    | SDC4           |
| -6.772   | SEMA3A         |
| 4.592    | SEMA3B         |
| 3.15     | SERPINA1       |
| 16.338   | SERPINB2       |
| 6.195    | SERPINB5       |
| -13.21   | SERPINE2       |
| -2.274   | SERPINF1       |
| 1.987    | SET            |
| 3.794    | SLC39A10       |
| 2.112    | SLC9A3R1       |
| 7.271    | SNRPB          |
| 2.226    | SOD2           |
| 3.042    | SORD           |
| -6.1E+14 | SPP1           |
| 2.599    | SRSF1          |
| 2.101    | SRSF3          |
| 1.998    | SSB            |
| 4.203    | ST13           |
| 2.108    | STIP1          |
| 14.147   | STMN1          |
| 3.805    | SYNCRIP        |
| 3.466    | TALDO1         |
| 2.065    | TES            |
| 6.173    | TFG            |
| 15.104   | TFRC           |
| 2.452    | TGFB1          |
| -9.623   | TGFBR3         |
| 11.294   | TGM2           |
| 12.516   | THBS1          |
| 2.466    | TIMP1          |
| 8.02     | TKT            |
| 4.31     | TMEM189-UBE2V1 |
| 2.044    | TMSB10/TMSB4X  |
| 7.119    | TPM4           |
| 2.417    | TPT1           |
| 7.674    | TRA2B          |

|          |         |
|----------|---------|
| 2.244    | TRIM29  |
| 3.743    | TUBA1B  |
| 2.753    | TUBB    |
| 2.889    | TUBB4B  |
| 2.246    | TXNDC12 |
| 12.461   | TXNDC17 |
| 2.492    | TXNDC5  |
| 8216733  | TXNRD1  |
| -2.352   | UAP1    |
| 3.714    | UBA1    |
| -4.757   | UBE2L3  |
| 7.686    | USP14   |
| 2.776    | VAPA    |
| 2.022    | VCP     |
| 4.673    | WARS    |
| 6.264    | XRCC6   |
| -1.8E+14 | YBX3    |



**Supplementary Table 3:** List of diseases and biological functions with predicted change in activity upon MYB modulation in MiaPaCa and BxPC3

| <b>I. MiaPaCa (shMYB vs. Scr)</b> |                                         |                |                                   |                           |                                                                                                                                                                                                                                                                                                                                                                                                                                                                                                                                                                                                                                                                                                                                                                                                                                                                                                                                                                                        |                            |
|-----------------------------------|-----------------------------------------|----------------|-----------------------------------|---------------------------|----------------------------------------------------------------------------------------------------------------------------------------------------------------------------------------------------------------------------------------------------------------------------------------------------------------------------------------------------------------------------------------------------------------------------------------------------------------------------------------------------------------------------------------------------------------------------------------------------------------------------------------------------------------------------------------------------------------------------------------------------------------------------------------------------------------------------------------------------------------------------------------------------------------------------------------------------------------------------------------|----------------------------|
| <b>Categories</b>                 | <b>Diseases or Functions Annotation</b> | <b>p-Value</b> | <b>Predicted Activation State</b> | <b>Activation z-score</b> | <b>Molecules</b>                                                                                                                                                                                                                                                                                                                                                                                                                                                                                                                                                                                                                                                                                                                                                                                                                                                                                                                                                                       | <b>Number of Molecules</b> |
| <b>Cellular Movement</b>          | Cell movement                           | 4.99E-41       | Decreased                         | -3.679                    | ACTN1,ACTN4,ADAM10,AHCY,AHNAK,ALCAM,ALDOA,ANXA1,ANXA2,ANXA5,APLP2,ARHGDIA,ARHGDIB,ARPC3,B4GALT1,BCAM,BSG,C3,CALR,CAP1,CD44,CDH1,CFL1,CLU,CNN2,COL7A1,CTNNA1,CTSB,CTSH,CTSL,CTSZ,DDT,DEK,DSG2,DSP,DSTN,ECM1,EFNB1,ENO1,EZR,FGFBP1,FLNB,FS CN1,GAPDH,GDF15,GLG1,GPI,GSN,HDGF,HMGA1,HMGA2,HMGB1,HNRNPA2B1,HNRNPAB,HNRNPK,HNRNPL,HSP90AA1,HSP90AB1,HSP90B1,HSPA1A/HSPA1B,HSPA5,HSPB1,HSPD1,HTRA1,IGF2R,IGFBP2,IGFBP6,IL1RL1,INHBA,ITGB1,ITGB4,JAG1,KLK6,KRT16,KRT19,KRT2,KRT8,LAMA3,LAMB1,LCN2,LCP1,LDHA,LGALS1,LGALS3BP,LGMN,LMNA,LMNB1,LMNB2,MAPRE1,MARCKS,MSN,NACA,NAMPT,NCL,NME1,NQO1,NT5E,OSMR,PA2G4,PARK7,PARP1,PDCD6IP,PEBP1,PFN1,PKM,PLAT,PLEC,PLTP,PPIA,PRCP,PRDX1,PRDX2,PRDX6,PTBP1,PTPRF,PTX3,RACK1,RDX,RNH1,S100A10,S100A11,S100A4,S100P,SEMA3B,SERPINA1,SERPINA3,SERPINB2,SERPINB5,SERPINE1,SERPINE2,SERPINH1,SFN,SLC9A3R1,SOD1,SRSF1,SSBP1,ST13,STC1,STMN1,TAGLN2,TFPI,TGFB1,TGFBI,TGFBR3,TKT,TMSB10/TMSB4X,TNFRSF6B,TPI1,TPM3,TPT1,TUBB,TXNRD1,VCL,VCP,VIM,WARS,YWHAE,YWHAZ | 158                        |
|                                   | Migration of cells                      | 2.25E-34       | Decreased                         | -3.525                    | ACTN1,ACTN4,ADAM10,AHCY,AHNAK,ALCAM,ALDOA,ANXA1,ANXA2,ANXA5,APLP2,ARHGDIA,ARHGDIB,B4GALT1,BCAM,BSG,C3,CALR,CAP1,CD44,CDH1,CFL1,CLU,CNN2,COL7A1,CTNNA1,CTSB,CTSH,CTSL,CTSZ,DDT,DEK,DSGP,ECM1,EFNB1,EZR,FLNB,FSCN1,GDF15,GLG1,GPI,GSN,HDGF,HMGA2,HMGB1,HNRNPA2B1,HNRNPK,HNRNPL,HSP90AA1,HSP90AB1,HSP90B1,HSPA1A/HSPA1B,HSPA5,HSPB1,HSPD1,HTRA1,IGF2R,IGFBP2,IGFBP6,IL1RL1,INHBA,ITGB1,ITGB4,JAG1,KLK6,KRT16,KRT19,KRT2,KRT8,LAMA3,LAMB1,LCN2,LCP1,LDHA,LGALS1,LGALS3BP,LGMN,LMNA,LMNB                                                                                                                                                                                                                                                                                                                                                                                                                                                                                                    | 139                        |

|                                   |          |           |        |                                                                                                                                                                                                                                                                                                                                                                                                                                                                                                                                                                                             |    |
|-----------------------------------|----------|-----------|--------|---------------------------------------------------------------------------------------------------------------------------------------------------------------------------------------------------------------------------------------------------------------------------------------------------------------------------------------------------------------------------------------------------------------------------------------------------------------------------------------------------------------------------------------------------------------------------------------------|----|
|                                   |          |           |        | 1,LMNB2,MAPRE1,MARCKS,MSN,NACA,NAMPT,NCL,NME1,NQO1,NT5E,OSMR,PA2G4,PARK7,PARP1,PFN1,PKM,PLAT,PLEC,PLTP,PPIA,PRCP,PRDX1,PRDX2,PTPRF,PTX3,RACK1,RDX,RNH1,S100A10,S100A11,S100A4,S100P,SERPINA1,SERPINA3,SERPINB2,SERPINB5,SERPINE1,SERPINE2,SFN,SLC9A3R1,SOD1,SSBP1,STC1,STMN1,TFPI,TGFB1,TGFBI,TGFBR3,TMSB10/TMSB4X,TNFRSF6B,TPM3,TPT1,TXNRD1,VCL,VCP,VIM,WARS,YWHAZ,YWHAZ                                                                                                                                                                                                                   |    |
| Invasion of cells                 | 6.03E-34 | Decreased | -3.747 | ACTN4,ADAM10,AHICY,AHNAK,ALCAM,ANXA1,ANXA2,ARRHGDI,BSG,CALR,CAP1,CD44,CDH1,CLU,COL7A1,CTSB,CTSD,CTSH,CTSL,CTSZ,DSP,ECM1,EZR,FBLN1,FKBP1A,FSCN1,GDF15,GPI,GSN,HDGF,HMGA1,HMGA2,HMGB1,HNRNPA2B1,HNRNPAB,HSP90AA1,HSP90AB1,HSP90B1,HSPA1A/HSPA1B,HSPA5,HTRA1,IGFBP2,INHBA,ITGB1,ITGB4,KLK6,KRT17,KRT19,KRT8,LAMA3,LCN2,LCP1,LDHA,LGALS1,LGMN,LMNA,MARCKS,NAMPT,NME1,NQO1,PA2G4,PARK7,PEBP1,PKM,PLAT,PLOD3,PPIA,PTBP1,RACK1,RNH1,S100A10,S100A11,S100A4,S100P,SERPINA1,SERPINB5,SERPINE1,SERPINE2,SFN,SLC9A3R1,SSBP1,STMN1,TAGLN2,TFPI,TGFB1,TGFBI,TGFBR3,TMSB10/TMSB4X,VCL,VCP,VIM,YWHAG,YWHAZ | 93 |
| Cell movement of tumor cell lines | 3.36E-27 | Decreased | -3.358 | ACTN1,ACTN4,ADAM10,AHNAK,ALCAM,ANXA1,ANXA2,ARRHGDI,BCAM,BSG,C3,CALR,CAP1,CD44,CDH1,CLU,CTSB,CTSH,CTSL,CTSZ,DSP,ECM1,EFNB1,EZR,FLNB,FSCN1,GDF15,GPI,HDGF,HMGA1,HMGA2,HMGB1,HNRNPA2B1,HNRNPK,HSP90AA1,HSP90B1,HSPA1A/HSPA1B,HTRA1,IGFBP2,IGFBP6,ITGB1,ITGB4,KLK6,KRT19,KRT8,LAMA3,LCN2,LCP1,LDHA,LGALS1,LGALS3BP,LMNA,MARCKS,MSN,NCL,NME1,NT5E,PA2G4,PEBP1,PFN1,PKM,PLAT,PPIA,PRDX2,RACK1,S100A10,S100A11,S100A4,S100P,SERPINA1,SERPINB5,SERPINE1,SFN,SLC9A3R1,SSBP1,STMN1,TAGLN2,TFPI,TGFB1,TGFBI,TGFBR3,TPM3,VCL,VCP,VIM                                                                    | 85 |
| Invasion of tumor cell lines      | 7.17E-27 | Decreased | -3.847 | ACTN4,ADAM10,AHNAK,ALCAM,ANXA1,ARRHGDI,BSG,CALR,CAP1,CD44,CDH1,CLU,CTSB,CTSD,CTSH,CTSZ,DSP,ECM1,EZR,FBLN1,FSCN1,GDF15,GPI,HDGF,HMGA1,HMGA2,HMGB1,HNRNPA2B1,HNRNPAB,HSP90AA1,HSPA1A/HSPA1B,HTRA1,IGFBP2,ITGB1,ITGB4,KLK6,KRT17,KRT19,KRT8,LCN2,LCP1,LDHA,LGALS1,LMNA,MARCKS,NAMPT,NME1,PA2                                                                                                                                                                                                                                                                                                   | 74 |

|                                       |          |           |        |                                                                                                                                                                                                                                                                                                                                                                                                                                                 |    |
|---------------------------------------|----------|-----------|--------|-------------------------------------------------------------------------------------------------------------------------------------------------------------------------------------------------------------------------------------------------------------------------------------------------------------------------------------------------------------------------------------------------------------------------------------------------|----|
|                                       |          |           |        | G4,PEBP1,PKM,PLAT,PTBP1,RACK1,S100A10,S100A11,S100A4,S100P,SERPINA1,SERPINB5,SERPINE2,SFN,SLC9A3R1,SSBP1,STMN1,TAGLN2,TFPI,TGFB1,TGFBI,TGFBR3,TMSB10/TMSB4X,VCP,VIM,YWHAG,YWHAQ                                                                                                                                                                                                                                                                 |    |
| Migration of tumor cell lines         | 1.95E-23 | Decreased | -3.658 | ACTN1,ACTN4,ADAM10,AHNAK,ALCAM,ANXA1,ANXA2,ARRHGDIB,BCAM,BSG,CALR,CD44,CDH1,CLU,CTSB,CTSH,CTSL,CTSZ,DSP,ECM1,EFNB1,EZR,FLNB,FSCN1,GDF15,GPI,HMGF,HMGA2,HNRNPA2B1,HNRNPK,HSP90AA1,HSP90B1,HSPA1A/HSPA1B,HTRA1,IGFBP2,IGFBP6,ITGB1,ITGB4,KLK6,KRT19,KRT8,LAMA3,LCN2,LDHA,LGALS1,LGALS3BP,LMNA,MSN,NCL,NME1,PKM,PLAT,PPIA,PRDX2,RACK1,S100A10,S100A11,S100A4,S100P,SERPINA1,SERPINE1,SFN,SLC9A3R1,SSBP1,STMN1,TFPI,TGFB1,TGFBI,TGFBR3,TPM3,VCP,VIM | 72 |
| Invasion of breast cancer cell lines  | 4.33E-14 | Decreased | -2.086 | AHNAK,BSG,CALR,CD44,CDH1,CTSB,ECM1,EZR,FSCN1,GPI,HMGA2,HSP90AA1,ITGB1,ITGB4,KRT19,KRT8,LCN2,LDHA,NAMPT,NME1,PTBP1,S100A11,SERPINA1,SERPINB5,SLC9A3R1,SSBP1,STMN1,TFPI,TGFB1,TGFBR3,VIM,YWHAG                                                                                                                                                                                                                                                    | 32 |
| Cell movement of sarcoma cell lines   | 9.58E-13 | Decreased | -2.651 | ACTN4,AHNAK,BCAM,CD44,CDH1,CTSB,FLNB,GPI,HNRNPK,IGFBP6,ITGB1,LAMA3,S100A11,SERPINE1,SLC9A3R1,STMN1,TPM3,VCP                                                                                                                                                                                                                                                                                                                                     | 18 |
| Cell movement of endothelial cells    | 1.16E-12 | Decreased | -3.624 | ADAM10,ALCAM,ANXA1,ANXA2,CALR,CD44,CNN2,EFNB1,FLNB,GPI,HMGB1,HSP90AB1,HSPA5,HSPB1,IGF2R,IL1RL1,ITGB1,ITGB4,LGALS1,MARCKS,NCL,PKM,S100A4,S100P,SERPINE1,STC1,TFPI,TGFB1,TGFBI,TMSB10/TMSB4X,TNFRSF6B,VIM,WARS,YWHAZ                                                                                                                                                                                                                              | 34 |
| Migration of endothelial cells        | 1.27E-11 | Decreased | -3.632 | ADAM10,ALCAM,ANXA1,ANXA2,CALR,CD44,CNN2,FLNB,GPI,HMGB1,HSP90AB1,HSPA5,HSPB1,IGF2R,ITGB1,ITGB4,LGALS1,MARCKS,NCL,PKM,S100P,SERPINE1,STC1,TFPI,TGFB1,TGFBI,TMSB10/TMSB4X,TNFRSF6B,VIM,WARS,YWHAZ                                                                                                                                                                                                                                                  | 31 |
| Cell movement of carcinoma cell lines | 3.43E-11 | Decreased | -2.676 | ADAM10,ALCAM,BCAM,BSG,CALR,CD44,CDH1,CLU,CTSB,CTSH,DSP,EZR,HMGA2,HNRNPA2B1,ITGB1,NME1,S100A10,S100A4,S100P,SERPINE1,STMN1,TAGLN2,TGFB1,TGFBI,VI                                                                                                                                                                                                                                                                                                 | 25 |
| Cell spreading                        | 9.23E-11 | Decreased | -3.298 | ACTN4,ARPC3,C3,CAP1,CD44,CNN2,EFNB1,FLNB,IGF2R,ITGB1,ITGB4,LAMA3,LGALS1,MARCKS,PDCD6IP,PFN1,PTBP1                                                                                                                                                                                                                                                                                                                                               | 26 |

|                                          |          |           |        |                                                                                                                                                                                                                                                        |    |
|------------------------------------------|----------|-----------|--------|--------------------------------------------------------------------------------------------------------------------------------------------------------------------------------------------------------------------------------------------------------|----|
|                                          |          |           |        | ,RACK1,SERPINA3,SERPINE1,TFPI,TGFB1,TGFBI,VCL,VIM,YWHAZ                                                                                                                                                                                                |    |
| Homing of cells                          | 1.28E-10 | Decreased | -2.339 | ACTN1,ADAM10,ANXA1,ANXA2,B4GALT1,C3,CALR,CD44,CLU,DDT,DEK,EFNB1,FGFBP1,FSCN1,GSN,HMGB1,HSPD1,IGF2R,INHBA,ITGB1,LCN2,LCP1,LGALS1,LGMN,NQO1,NT5E,PFN1,PLAT,PLEC,PPIA,S100A4,SEMA3B,SERPINA1,SERPINA3,SERPINE1,SERPINH1,ST13,TGFB1,TMSB10/TMSB4X,TNFRSF6B | 40 |
| Migration of carcinoma cell lines        | 2.45E-10 | Decreased | -3.078 | ADAM10,ALCAM,BCAM,BSG,CALR,CD44,CDH1,CLU,CTSB,CTSH,DSP,EZR,HMGA2,HNRNPA2B1,ITGB1,S100A10,S100P,SERPINE1,STMN1,TGFB1,TGFBI,VIM                                                                                                                          | 22 |
| Chemotaxis                               | 3.25E-10 | Decreased | -2.416 | ACTN1,ADAM10,ANXA1,ANXA2,B4GALT1,C3,CALR,CD44,CLU,DDT,DEK,EFNB1,FGFBP1,GSN,HMGB1,HSPD1,IGF2R,INHBA,ITGB1,LCN2,LCP1,LGALS1,LGMN,NT5E,PFN1,PLAT,PLEC,PPIA,S100A4,SEMA3B,SERPINA1,SERPINA3,SERPINE1,SERPINH1,ST13,TGFB1,TMSB10/TMSB4X,TNFRSF6B            | 38 |
| Migration of sarcoma cell lines          | 3.44E-10 | Decreased | -2.451 | ACTN4,AHNAK,BCAM,CD44,FLNB,HNRNPK,IGFBP6,LAMA3,S100A11,SERPINE1,SLC9A3R1,STMN1,TPM3,VCP                                                                                                                                                                | 14 |
| Cell movement of fibrosarcoma cell lines | 5.97E-10 | Decreased | -2.247 | AHNAK,BCAM,FLNB,GPI,HNRNPK,ITGB1,LAMA3,S100A11,SERPINE1,SLC9A3R1,TPM3                                                                                                                                                                                  | 11 |
| Invasion of carcinoma cell lines         | 3.64E-09 | Decreased | -2.336 | ADAM10,ALCAM,BSG,CALR,CD44,CDH1,CLU,CTSB,CTSH,DSP,EZR,FSCN1,HTRA1,ITGB1,NME1,S100A10,S100A4,STMN1,TAGLN2,TGFB1,TGFBI,VIM                                                                                                                               | 22 |
| Cell movement of lung cancer cell lines  | 6.34E-08 | Decreased | -2.361 | ADAM10,ALCAM,BCAM,CD44,CTSL,DSP,HMGA2,HNRNPA2B1,ITGB1,S100A10,S100A4,S100P,STMN1,TGFB1,VIM                                                                                                                                                             | 15 |
| Cell movement                            | 1.68E-07 | Decreased | -2.008 | ACTN4,ADAM10,ANXA1,ANXA2,BSG,C3,CALR,CD44,DEK,EFNB1,EZR,HMGB1,HNRNPL,HSPD1,INHBA,ITGB1,LCP1,LG                                                                                                                                                         | 30 |

|                                |                                         |          |           |        |                                                                                                                                                                                                                                                                                                                                                                                                                                                                                                                                                                                                          |     |
|--------------------------------|-----------------------------------------|----------|-----------|--------|----------------------------------------------------------------------------------------------------------------------------------------------------------------------------------------------------------------------------------------------------------------------------------------------------------------------------------------------------------------------------------------------------------------------------------------------------------------------------------------------------------------------------------------------------------------------------------------------------------|-----|
|                                | of mononuclear leukocytes               |          |           |        | ALS1,LGMN,MSN,NQO1,NT5E,PLEC,PPIA,S100A4,SERPINA3,SERPINE1,SERPINE2,TGFB1,TNFRSF6B                                                                                                                                                                                                                                                                                                                                                                                                                                                                                                                       |     |
|                                | Movement of vascular endothelial cells  | 3.06E-07 | Decreased | -2.767 | ANXA1,ANXA2,CD44,CNN2,FLNB,HSP90AB1,HSPA5,IL1RL1,ITGB1,ITGB4,LGALS1,NCL,PKM,TGFB1,TGFBI,TMSB10/TMSB4X,TNFRSF6B                                                                                                                                                                                                                                                                                                                                                                                                                                                                                           | 17  |
|                                | Migration of vascular endothelial cells | 3.09E-07 | Decreased | -3.029 | ANXA1,ANXA2,CD44,CNN2,FLNB,HSP90AB1,HSPA5,ITGB1,ITGB4,LGALS1,NCL,PKM,TGFB1,TGFBI,TMSB10/TMSB4X,TNFRSF6B                                                                                                                                                                                                                                                                                                                                                                                                                                                                                                  | 16  |
|                                | Migration of lung cancer cell lines     | 3.19E-07 | Decreased | -2.1   | ADAM10,ALCAM,BCAM,CTSL,DSP,HMGA2,HNRNPA2B1,ITGB1,S100A10,S100P,STMN1,TGFB1,VIM                                                                                                                                                                                                                                                                                                                                                                                                                                                                                                                           | 13  |
| <b>Inflammatory Response</b>   | Inflammatory response                   | 2.39E-09 | Decreased | -2.016 | ADAM10,ANXA1,ANXA2,B4GALT1,C3,CD44,CTSB,DDT,DEK,ECM1,EFNB1,FKBP1A,GSN,HMGB1,HSPB1,HSPD1,IL1RL1,INHBA,ITGB1,KRT1,KRT16,LCN2,LCP1,LGALS1,LGALS3BP,LGMN,NCL,NT5E,PARK7,PARP1,PFN1,PLAT,PLEC,PPIA,PRDX5,PTX3,S100A4,SERPINA1,SERPINA3,SERPINE1,SOD1,TGFB1,TMSB10/TMSB4X,TNFRSF6B,TUBB4B,UBE2N                                                                                                                                                                                                                                                                                                                | 46  |
| <b>Cell Death and Survival</b> | Necrosis                                | 1.71E-36 | Increased | 4.851  | ADAM10,ALCAM,ALDH1A1,ALDOA,ANP32A,ANXA1,ANXA2,ANXA5,ARHGDI1,BSG,C3,CALR,CBR1,CBX3,CCT6A,CD44,CDC37,CDH1,CLU,CNN2,CTNNA1,CTSB,CTSD,CTSZ,CYCS,DEK,DNASE2,DSG2,DSP,EEF1A1,EEF1D,EEF2,EFNB1,ENO1,EZR,FBLN1,FKBP1A,FLNB,GAPDH,GDF15,GLO1,GPI,GSN,GSTP1,HDGF,HLA-B,HMGA1,HMGA2,HMGB1,HNRNPC,HNRNPK,HPRT1,HSP90AA1,HSP90AB1,HSP90B1,HSPA1A/HSPA1B,HSPA4,HSPA5,HSPB1,HSPD1,HSPH1,HTRA1,IGF2R,IGFBP2,IGFBP6,IL1RL1,INHBA,ITGB1,ITGB4,JAG1,KLK6,KRT18,KRT8,LAMA3,LCN2,LDHA,LGALS1,LGALS3BP,LGMN,LMNA,LMNB1,MDH1,MSN,MVP,NAMPT,NASP,NCL,NME1,NQO1,NT5E,OSMR,PA2G4,PABPC1,PARK7,PARP1,PCSK9,PDCD5,PDCD6IP,PEBP1,PFN1 | 164 |



|                                |          |           |       |                                                                                                                                                                                                                                                                                                                                                                                                                                                                                                                                                                                                                                                                                                                                 |     |
|--------------------------------|----------|-----------|-------|---------------------------------------------------------------------------------------------------------------------------------------------------------------------------------------------------------------------------------------------------------------------------------------------------------------------------------------------------------------------------------------------------------------------------------------------------------------------------------------------------------------------------------------------------------------------------------------------------------------------------------------------------------------------------------------------------------------------------------|-----|
|                                |          |           |       | GDF15,GLO1,GPI,GSN,GSTP1,HDGF,HEXB,HLA-B,HMGA1,HMGA2,HMGB1,HNRNPC,HNRNPK,HSP90AA1,HSP90AB1,HSP90B1,HSPA1A/HSPA1B,HSPA4,HSPA5,HSPB1,HSPD1,HSPH1,HTRA1,IGF2R,IGFBP6,IL1RL1,INHBA,ITGB1,ITGB4,JAG1,KRT17,KRT18,KRT8,LAMA3,LCN2,LDHA,LGALS1,LGALS3BP,LGMN,LMNA,LMNB1,MDH1,MSN,MVP,NAMPT,NASP,NCL,NME1,NQO1,NT5E,OSMR,PA2G4,PARK7,PARP1,PCSK9,PDCD5,PDCD6IP,PEBP1,PFN1,PKM,PLAT,PNP,PPIA,PRDX1,PRDX2,PRDX5,PRDX6,PSAP,PSMB1,PTPRF,RACK1,RDX,RPLP0,RPS3,S100A10,S100A11,S100A4,SEMA3B,SERPINA1,SERPINA3,SERPINB5,SERPINB9,SERPINE1,SERPINE2,SERPINH1,SET,SFN,SFPQ,SOD1,SRSF1,STC1,STIP1,STMN1,SUB1,SUMO2,TAGLN2,TFPI,TFRC,TGFB1,TGFBI,TGFBR3,TMSB10/TMSB4X,TNFRSF6B,TPT1,TXNDC5,TXNRD1,UBA1,VCL,VCP,VIM,XRCC6,YWHAB,YWHAH,YWHAQ,YWHAZ |     |
| Cell death of tumor cell lines | 6.37E-26 | Increased | 2.996 | ADAM10,ALCAM,ANXA2,ANXA5,ARHGDI,BSG,CALR,CBR1,CBX3,CCT6A,CD44,CDC37,CDH1,CLU,CNN2,CTSB,CTSD,CYCS,DEK,DSG2,DSP,EEF1A1,EEF2,ENO1,EZR,FBLN1,FKBP1A,FLNB,GAPDH,GDF15,GLO1,GPI,GSN,GSTP1,HMGA1,HNRNPC,HNRNPK,HSP90AB1,HSPA1A/HSPA1B,HSPA4,HSPA5,HSPB1,HSPD1,HTRA1,IGF2R,IGFBP2,IGFBP6,IL1RL1,INHBA,ITGB1,ITGB4,JAG1,KLK6,KRT18,LCN2,LGALS1,LGALS3BP,LMNA,LMNB1,MSN,MVP,NAMPT,NASP,NCL,NME1,NQO1,NT5E,PA2G4,PARK7,PARP1,PDCD6IP,PEBP1,PKM,PLAT,PPIA,PRDX1,PRDX2,PSAP,PTPRF,RACK1,RDX,RPLP0,RPS3,S100A11,S100A4,SEMA3B,SERPINA3,SERPINB5,SERPINE1,SFN,SFPQ,SOD1,SRSF1,SSB,STMN1,TAGLN2,TFRC,TGFB1,TGFBR3,TMSB10/TMSB4X,TNFRSF6B,TPT1,TXNRD1,VCP,YWHAH,YWHAQ,YWHAZ                                                                      | 108 |
| Apoptosis of tumor cell lines  | 6.11E-23 | Increased | 2.704 | ALCAM,ANXA2,ANXA5,ARHGDI,BSG,CALR,CBX3,CD44,CDC37,CDH1,CLU,CNN2,CTSB,CTSD,CYCS,DSG2,DSP,EEF1A1,ENO1,EZR,FBLN1,FLNB,GAPDH,GDF15,GLO1,GSN,GSTP1,HMGA1,HNRNPC,HNRNPK,HSP90AB1,HSPA1A/HSPA1B,HSPA4,HSPA5,HSPB1,HSPD1,HTRA1,IGF2R,IGFBP6,IL1RL1,INHBA,ITGB1,ITGB4,JAG1,KRT18,LCN2,LGALS1,LGALS3BP,LMNB1,MSN,MVP,NASP,NCL,NME1,NQO1,PA2G4,PARK7,PARP1,PDCD6IP,PEBP1,PKM,PLAT,PPIA,PRDX1,PSAP,RACK1,RPLP0,RPS3,S100A11,S100A4,SEMA3B,SERPINA3,SERPINB5,SER                                                                                                                                                                                                                                                                             | 90  |

|                                   |          |           |        |                                                                                                                                                                                                                                                                                                                                                                                                                                                                                                                                                    |    |
|-----------------------------------|----------|-----------|--------|----------------------------------------------------------------------------------------------------------------------------------------------------------------------------------------------------------------------------------------------------------------------------------------------------------------------------------------------------------------------------------------------------------------------------------------------------------------------------------------------------------------------------------------------------|----|
|                                   |          |           |        | PINE1,SFN,SFPQ,SOD1,SRSF1,STMN1,TAGLN2,TFRC,TGFB1,TGFBR3,TMSB10/TMSB4X,TNFRSF6B,TPT1,TXNRD1,VCP,YWHAE,YWHAZ                                                                                                                                                                                                                                                                                                                                                                                                                                        |    |
| Necrosis of tumor                 | 3.46E-16 | Increased | 2.068  | ANXA1,ANXA2,BSG,CD44,CDH1,CLU,CTSB,CYCS,EEF1A1,ENO1,GDF15,HMGA2,HMGB1,HSP90AB1,HSPA1A/HSPA1B,IGFBP2,INHBA,JAG1,LAMA3,LGALS1,NAMPT,PABPC1,PARP1,PNP,PSMA6,PSMA7,PSMB1,PSMB5,RACK1,RAN,RPLP0,RPS13,RPS3,SEMA3B,SERPINA3,SERPINB5,SERPINB9,SERPINE1,SNRPB,SOD1,STC1,TGFB1,VCP                                                                                                                                                                                                                                                                         | 43 |
| Cell death of tumor cells         | 7.84E-16 | Increased | 2.068  | ANXA1,ANXA2,BSG,CD44,CDH1,CLU,CTSB,CYCS,EEF1A1,ENO1,GDF15,HMGA2,HMGB1,HSP90AB1,HSPA1A/HSPA1B,INHBA,JAG1,LAMA3,LGALS1,NAMPT,PABPC1,PARP1,PNP,PSMA6,PSMA7,PSMB1,PSMB5,RACK1,RAN,RPLP0,RPS13,RPS3,SEMA3B,SERPINA3,SERPINB5,SERPINB9,SERPINE1,SNRPB,SOD1,STC1,TGFB1,VCP                                                                                                                                                                                                                                                                                | 42 |
| Cell death of lymphoma cell lines | 4.28E-08 | Increased | 3.228  | ANXA2,ARHGDI1,CD44,CNN2,EZR,GLO1,HNRNPC,HSPB1,IGFBP2,INHBA,JAG1,LAMA3,LMNB1,MSN,NCL,RPLP0,SERPINA3,TGFB1,TNFRSF6B,YWHAZ                                                                                                                                                                                                                                                                                                                                                                                                                            | 19 |
| Cell survival                     | 5.42E-18 | Decreased | -5.737 | ACTN4,ALCAM,ANXA5,C3,CALB2,CALR,CBR1,CD44,CDH1,CLU,CTSB,CTSD,ECM1,EEF2,EFNB1,ENO1,EZR,GDF15,GSTP1,H6PD,HDGF,HMGA1,HMGA2,HMGB1,HNRNPK,HSP90AB1,HSP90B1,HSPA1A/HSPA1B,HSPA4,HSPA5,HSPB1,HSPD1,IGF2R,IGFBP2,IL1RL1,ITGB1,JAG1,KLK6,KRT19,LAMA3,LCN2,LDHA,LGALS3BP,LMNA,LMNB1,MINPP1,MVP,NAMPT,NME1,PARK7,PARP1,PKM,PLAT,PPIA,PRCP,PRDX2,PRDX6,PSAP,PSMA1,PSMA6,PSMA7,PSMB4,PSMB5,PTPRF,RAB11A,RACK1,S100A4,S100P,SERPINA3,SERPINB2,SERPINB5,SERPINB9,SERPINE1,SET,SFN,SNRPB,SOD1,SRSF3,STC1,STMN1,TFPI,TGFB1,TPT1,TUBB,TXNDC5,VCL,VCP,VIM,XRCC6,YWHAZ | 90 |
| Cell viability                    | 1.93E-14 | Decreased | -5.818 | ACTN4,ANXA5,C3,CALB2,CALR,CBR1,CD44,CDH1,CLU,CTSB,CTSD,ECM1,EEF2,EFNB1,ENO1,EZR,GDF15,GSTP1,H6PD,HDGF,HMGA1,HMGA2,HMGB1,HNRNPK,HSP90AB1,HSP90B1,HSPA1A/HSPA1B,HSPA5,HSPB1,HSPD1,IGF2R,IGFBP2,ITGB1,JAG1,KLK6,KRT19,LAMA3,LCN2,LDHA,LGALS3BP,LMNA,LMNB1,MINPP1,MVP,NAMPT,NME1,PARK7,PARP1,PKM,PLAT,PPIA,PRCP,PRDX2,PRDX6,PSAP,PSMA1,PSMA6,PSMB4,                                                                                                                                                                                                    | 80 |



|                                          |                                         |          |           |                                                                                                                                                |                                                                                                                                                                                                                                                                                                                                                                                                                                                                                                                                                                                                                                                                                           |     |
|------------------------------------------|-----------------------------------------|----------|-----------|------------------------------------------------------------------------------------------------------------------------------------------------|-------------------------------------------------------------------------------------------------------------------------------------------------------------------------------------------------------------------------------------------------------------------------------------------------------------------------------------------------------------------------------------------------------------------------------------------------------------------------------------------------------------------------------------------------------------------------------------------------------------------------------------------------------------------------------------------|-----|
|                                          |                                         |          |           | PTPRF,RAB11A,RACK1,S100A4,S100P,SERPINA3,SERPINB2,SERPINB5,SERPINB9,SERPINE1,SFN,SNRPB,SOD1,SRSF3,STC1,STMN1,TFPI,TGFB1,TXNDC5,VCP,XRCC6,YWHAZ |                                                                                                                                                                                                                                                                                                                                                                                                                                                                                                                                                                                                                                                                                           |     |
|                                          | Cell viability of tumor cell lines      | 3.33E-13 | Decreased | -4.369                                                                                                                                         | ACTN4,CALR,CBR1,CD44,CDH1,CLU,CTSD,ECM1,EEF2,ENO1,GDF15,GSTP1,H6PD,HMGA1,HMGA2,HMGB1,HSP90AB1,HSP90B1,HSPA1A/HSPA1B,HSPA5,HSPB1,IGF2R,IGFBP2,ITGB1,JAG1,KLK6,KRT19,LDHA,LGALS3BP,LMNB1,MINPP1,NAMPT,PARK7,PARP1,PKM,PLAT,PRCP,PRDX2,PSAP,PSMA1,PSMA6,PSMB4,PTPRF,RAB11A,RACK1,S100A4,S100P,SERPINA3,SERPINB2,SERPINB5,SFN,SNRPB,SOD1,SRSF3,STC1,TFPI,TGFB1,VCP,XRCC6                                                                                                                                                                                                                                                                                                                      | 59  |
| <b>Cellular Growth and Proliferation</b> | Cell proliferation of tumor cell lines  | 1.22E-25 | Decreased | -3.903                                                                                                                                         | ACTN1,ACTN4,ADAM10,AHCY,AHNAK,ALCAM,ALDH1A1,ALDOA,ANXA1,ANXA2,BSG,CACYBP,CALR,CD44,CDC37,CDH1,CLU,CNN2,CTSB,CTSD,CTSL,DEK,DSG2,EEF1A1,EEF1B2,EZR,FGFBP1,FSCN1,GAPDH,GDF15,GSTP1,HDGF,HIST1H1D,HMGA1,HMGA2,HMGB1,HNRNPA2B1,HNRNPK,HSP90AA1,HSPA5,HSPB1,IGF2R,IGFBP2,INHBA,ITGB1,ITGB4,JAG1,KLK6,KRT17,KRT19,KRT8,LCN2,LCP1,LDHA,LGALS1,LMNA,MAPRE1,NACA,NAMPT,NASP,NCL,NME1,NQO1,PA2G4,PARP1,PEBP1,PFN1,PGD,PKM,PLAT,PRDX2,PRKCSH,PTBP1,PTPRF,RACK1,RAN,S100A10,S100A11,S100A4,S100P,SEMA3B,SERPINB2,SERPINB5,SERPINE1,SET,SFN,SFPQ,SLC9A3R1,SOD1,SPTAN1,SRSF1,SRSF3,SSB,SSBP1,STMN1,SUMO2,TAGLN2,TES,TFPI,TFRC,TGFB1,TGFBR3,TMSB10/TMSB4X,TPT1,TUBB,UAP1,UBA1,VCP,XRCC6,YWHAG,YWHAQ,YWHAZ | 112 |
|                                          | Proliferation of mononuclear leukocytes | 1.93E-12 | Decreased | -3.723                                                                                                                                         | AHNAK,ANXA1,ARHGDIA,ARHGDIB,BSG,C3,CALR,CD44,CDH1,CTSD,CTS,EFNB1,EZR,FKBP1A,GPI,GSTP1,HMGA1,HMGB1,HNRNPA2B1,HNRNPL,HPRT1,HSP90B1,HSPA1A/HSPA1B,HSPA5,HSPD1,IGFBP2,IL1RL1,INHBA,ITGB1,JAG1,LCP1,LGALS1,MSN,MVP,NT5E,PARP1,PNP,PPIA,PPL,PRDX2,RPS3,SERPINA1,SERPINB9,SFN,TALDO1,TFRC,TGFB1,TNFRSF6B,TPT1,UBE2N                                                                                                                                                                                                                                                                                                                                                                              | 50  |
|                                          | Proliferation of lymphatic system cells | 2.85E-12 | Decreased | -3.746                                                                                                                                         | AHNAK,ANXA1,ARHGDIA,ARHGDIB,BSG,C3,CALR,CD44,CDH1,CTSD,CTS,EFNB1,EZR,FKBP1A,GPI,GSTP1,HMGA1,HMGB1,HNRNPA2B1,HNRNPL,HPRT1,HSP90AB1,HSP90B1,HSPA1A/HSPA1B,HSPA5,HSPD1,IGFBP2,IL1RL1,INHBA,ITGB1,JAG1,LCN2,LCP1,LGALS1,MSN,MVP,NT5E,PARP1,PNP,PPL,PRDX2,RPS3,SERPINA1,SERPINB9,SFN,SOD1,TFRC,TGFB1,                                                                                                                                                                                                                                                                                                                                                                                          | 52  |
|                                          |                                         |          |           |                                                                                                                                                |                                                                                                                                                                                                                                                                                                                                                                                                                                                                                                                                                                                                                                                                                           |     |

|                              |                                                   |          |           |                           |                                                                                                                                                                                                                                                                                                                                                                                                                                                                                                                                                 |    |
|------------------------------|---------------------------------------------------|----------|-----------|---------------------------|-------------------------------------------------------------------------------------------------------------------------------------------------------------------------------------------------------------------------------------------------------------------------------------------------------------------------------------------------------------------------------------------------------------------------------------------------------------------------------------------------------------------------------------------------|----|
|                              |                                                   |          |           | TNFRSF6B,TPT1,UBE2N,YWHAG |                                                                                                                                                                                                                                                                                                                                                                                                                                                                                                                                                 |    |
|                              | Proliferati<br>on of<br>immune<br>cells           | 2.94E-12 | Decreased | -3.494                    | AHNAK,ANXA1,ARHGDIA,ARHGDIB,BSG,C3,CALR,CD44,CDH1,CTSD,CTS,EFNB1,EZR,FKBP1A,GPI,GSTP1,HMGA1,HMGB1,HNRNPA2B1,HNRNPL,HPRT1,HSP90B1,HSPA1A/HSPA1B,HSPA5,HSPD1,IGFBP2,IL1RL1,INHBA,ITGB1,JAG1,LCP1,LGALS1,MSN,MVP,NT5E,PARP1,PNP,PPIA,PPL,PRDX2,RPS3,SERPINA1,SERPINB9,SERPINE1,SFN,TALDO1,TFRC,TGFB1,TNFRSF6B,TPT1,UBE2N                                                                                                                                                                                                                           | 51 |
|                              | Proliferati<br>on of<br>blood<br>cells            | 5.14E-12 | Decreased | -3.263                    | AHNAK,ANXA1,ARHGDIA,ARHGDIB,BSG,C3,CALR,CD44,CDH1,CTSD,CTS,EFNB1,EZR,FKBP1A,GDF15,GPI,GSTP1,HMGA1,HMGB1,HNRNPA2B1,HNRNPL,HPRT1,HSP90B1,HSPA1A/HSPA1B,HSPA5,HSPD1,IGFBP2,IL1RL1,INHBA,ITGB1,JAG1,LCP1,LGALS1,MSN,MVP,NT5E,PARP1,PNP,PPIA,PPL,PRDX2,RPS3,SERPINA1,SERPINB9,SERPINE1,SET,SFN,SOD1,TALDO1,TFRC,TGFB1,TNFRSF6B,TPT1,UBE2N                                                                                                                                                                                                            | 54 |
|                              | Proliferati<br>on of<br>lymphocyt<br>es           | 4.96E-11 | Decreased | -3.413                    | AHNAK,ANXA1,ARHGDIA,ARHGDIB,BSG,C3,CALR,CD44,CDH1,CTSD,CTS,EFNB1,EZR,FKBP1A,GPI,HMGA1,HMGB1,HNRNPA2B1,HNRNPL,HPRT1,HSP90B1,HSPA1A/HSPA1B,HSPA5,HSPD1,IGFBP2,IL1RL1,INHBA,ITGB1,JAG1,LCP1,LGALS1,MSN,MVP,NT5E,PARP1,PNP,PPL,PRDX2,RPS3,SERPINA1,SERPINB9,SFN,TFRC,TGFB1,TNFRSF6B,TPT1,UBE2N                                                                                                                                                                                                                                                      | 47 |
|                              | Cell<br>proliferati<br>on of T<br>lymphocyt<br>es | 6.90E-11 | Decreased | -3.252                    | AHNAK,ANXA1,ARHGDIA,ARHGDIB,BSG,C3,CALR,CD44,CDH1,CTSD,CTS,EFNB1,FKBP1A,GPI,HMGB1,HNRNPA2B1,HNRNPL,HSP90B1,HSPA1A/HSPA1B,HSPA5,HSPD1,IGFBP2,IL1RL1,INHBA,ITGB1,JAG1,LCP1,LGALS1,MSN,MVP,NT5E,PARP1,PNP,PPL,PRDX2,RPS3,SERPINB9,TFRC,TGFB1,TNFRSF6B,UBE2N                                                                                                                                                                                                                                                                                        | 41 |
| <b>Protein<br/>Synthesis</b> | Metabolis<br>m of<br>protein                      | 1.23E-24 | Decreased | -2.045                    | ADAM10,ANXA1,APLP2,B4GALT1,C3,CALR,CCT6A,CDC37,CDH1,CFL1,CLU,CP,CTSA,CTSB,CTSD,CTSH,CTSL,CTS,DDX39B,EEF1A1,EEF1B2,EEF1D,EEF1G,EEF2,EIF4A2,ERP44,FKBP1A,GAPDH,GSN,HEXB,HIST1H1B,HIST1H3A,HIST2H4A,HNRNPD,HNRNPK,HNRNPL,HSP90AA1,HSP90AB1,HSP90B1,HSPA1A/HSPA1B,HSPA5,HSPB1,HSPD1,HTRA1,IGFBP2,IGFBP6,INHBA,ITGB1,KLK6,KRT17,LAMB1,LGALS1,LGMN,NACA,NCL,PABPC1,PARK7,PCBP1,PCSK9,PDIA6,PFN1,PLAT,PLTP,PRKCSH,PSMB5,PTBP1,RAB7A,RACK1,RBMX,RPLP0,RPLP2,RPS13,RPS3,SERPINA1,SERPINE1,SERPINE2,SOD1,SSB,STIP1,SYNCRIP,TGFB1,TGFB1,UBE2N,VCP,VIM,WARS | 86 |

|                                           |                              |          |           |        |                                                                                                                                                                                                                                                                                                                                                                                                                                                                                                                                                                  |    |
|-------------------------------------------|------------------------------|----------|-----------|--------|------------------------------------------------------------------------------------------------------------------------------------------------------------------------------------------------------------------------------------------------------------------------------------------------------------------------------------------------------------------------------------------------------------------------------------------------------------------------------------------------------------------------------------------------------------------|----|
|                                           | Synthesis of protein         | 9.68E-15 | Decreased | -2.079 | ANXA1,B4GALT1,C3,CALR,DDX39B,EEF1A1,EEF1B2,EEF1D,EEF1G,EEF2,EIF4A2,FKBP1A,GAPDH,GSN,HNRNPD,HNRNPK,HNRNPL,HSPA1A/HSPA1B,HSPA5,HSPB1,IGFBP2,INHBA,ITGB1,KRT17,NCL,PABPC1,PARK7,PCBP1,PLTP,PTBP1,RACK1,RPLP0,RPLP2,RPS13,RPS3,SOD1,SSB,STIP1,SYNCRIP,TGFB1,VIM,WARS                                                                                                                                                                                                                                                                                                 | 42 |
| <b>Cellular Assembly and Organization</b> | Organization of cytoplasm    | 2.71E-18 | Decreased | -3.351 | ACTG1,ACTN1,ACTN4,ADAM10,AHNAK,ALDOA,ANP32A,ANXA1,ARHGDI,ARPC3,BSG,C3,CALR,CAP1,CAPZB,CD44,CDH1,CFL1,CFL2,CLU,CNN2,CYCS,DSP,EEF1A1,EFNB1,EZR,FLNB,FSCN1,GAPDH,GDF15,GPI,GSN,HDGF,HEXA,HEXB,HMGB1,HNRNPK,HPRT1,HSP90AA1,HSP90AB1,HSPB1,INHBA,ITGB1,ITGB4,KRT16,KRT17,KRT18,KRT9,LAMB1,LCN2,LCP1,LMNB1,MAPRE1,MARCKS,MSN,NECTIN1,NME1,NQO1,PARK7,PARP1,PFN1,PKM,PLAT,PLEC,PLS3,PRKCSH,PTK7,PTPRF,PTX3,RAB11A,RAN,RDX,RPS3,S100A11,S100A4,SERPINB5,SERPINE1,SLC9A3R1,SOD1,SPTAN1,SSBP1,STIP1,STMN1,TGFB1,TMSB10/TMSB4X,TNFRSF6B,TPM3,TUBB,TXNRD1,VAPA,VCL,VIM,YWHAH | 93 |
|                                           | Organization of cytoskeleton | 2.10E-17 | Decreased | -3.24  | ACTG1,ACTN1,ACTN4,ADAM10,AHNAK,ALDOA,ANP32A,ANXA1,ARHGDI,ARPC3,BSG,C3,CALR,CAP1,CAPZB,CD44,CDH1,CFL1,CFL2,CLU,CNN2,DSP,EEF1A1,EFNB1,EZR,FLNB,FSCN1,GAPDH,GDF15,GPI,GSN,HDGF,HMGB1,HNRNPK,HPRT1,HSP90AA1,HSP90AB1,HSPB1,INHBA,ITGB1,ITGB4,KRT16,KRT17,KRT18,KRT9,LAMB1,LCN2,LCP1,LMNB1,MAPRE1,MARCKS,MSN,NECTIN1,NME1,NQO1,PFN1,PKM,PLAT,PLEC,PLS3,PRKCSH,PTK7,PTPRF,RAB11A,RAN,RDX,RPS3,S100A11,S100A4,SERPINB5,SERPINE1,SLC9A3R1,SOD1,SPTAN1,STIP1,STMN1,TGFB1,TMSB10/TMSB4X,TNFRSF6B,TPM3,TUBB,TXNRD1,VAPA,VCL,VIM,YWHAH                                       | 86 |
|                                           | Microtubule dynamics         | 1.08E-13 | Decreased | -3.149 | ACTG1,ACTN4,ADAM10,AHNAK,ANP32A,ARHGDI,ARPC3,BSG,C3,CAP1,CAPZB,CD44,CDH1,CFL1,CLU,DSP,EEF1A1,EFNB1,EZR,FSCN1,GAPDH,GDF15,GSN,HDGF,HMGB1,HNRNPK,HPRT1,HSP90AA1,HSP90AB1,HSPB1,INHBA,ITGB1,ITGB4,KRT18,LAMB1,LCN2,LCP1,LMNB1,MAPRE1,MARCKS,MSN,NECTIN1,NME1,NQO1,PFN1,PKM,PLAT,PLEC,PRKCSH,PTK7,PTPRF,RAB11A,RAN,RDX,RPS3,S100A11,S100A4,SERPINE1,SLC9A3R1,SOD1,STIP1,STMN1,TGFB1,TNFRSF6B,TPM3,TUBB,TXNRD1,VAPA,VCL,VIM,YWHAH                                                                                                                                     | 71 |
|                                           |                              |          |           |        |                                                                                                                                                                                                                                                                                                                                                                                                                                                                                                                                                                  |    |

|                                               |                                   |          |           |        |                                                                                                                                                                                                                                                                                                                                                                 |    |
|-----------------------------------------------|-----------------------------------|----------|-----------|--------|-----------------------------------------------------------------------------------------------------------------------------------------------------------------------------------------------------------------------------------------------------------------------------------------------------------------------------------------------------------------|----|
|                                               | Formation of cellular protrusions | 5.29E-13 | Decreased | -2.82  | ACTN4,ADAM10,AHNAK,ARHGDI A,ARPC3,BSG,C3,CAP1,CAPZB,CD44,CDH1,CFL1,CLU,EEF1A1,EFNB1,EZR,FSCN1,GDF15,GSN,HMGB1,HNRNPK,HPRT1,HSP90AA1,HSP90AB1,HS PB1,INHBA,ITGB1,ITGB4,LAMB1,LCN2,LCP1,LMNB1,MARCKS,MSN,NECTIN1,NME1,PFN1,PLAT,PLEC,PRKCSH,PTK7,PTPRF,RAB11A,RDX,S100A11,S100A4,SERPINE1,SLC9A3R1,SOD1,STIP1,STMN1,TGFB1,TNFRSF6B,TPM3,TXNRD1,VAPA,VCL,VIM,YWHAH | 59 |
|                                               | Cell-cell contact                 | 5.01E-12 | Decreased | -2.226 | ACTN1,ACTN4,ADAM10,ALCAM,ANXA1,ANXA5,APLP2,BCAM,C3,CALR,CAPZB,CD44,CDH1,CLSTN3,CLU,CTNNA1,CTSB,DSG2,DSP,FSCN1,GDF15,GPI,HSPA4,INHBA,ITGB1,ITGB4,JAG1,KLK6,LAMA3,LGALS1,LGMN,MSN,NECTIN1,NME1,NT5E,PLEC,PTPRF,RACK1,RDX,SOD1,STIP1,TGFB1,VCL,VIM,YWHAG                                                                                                           | 45 |
|                                               | Cell-cell adhesion                | 5.95E-07 | Decreased | -2.683 | ADAM10,ALCAM,BCAM,CD44,CDH1,DSG2,DSP,GPI,ITGB1,JAG1,KLK6,LAMA3,NECTIN1,NME1,NT5E,RACK1,TGFB1                                                                                                                                                                                                                                                                    | 17 |
| <b>Cell-To-Cell Signaling and Interaction</b> | Interaction of tumor cell lines   | 9.48E-16 | Decreased | -2.651 | ACTN4,ADAM10,ALCAM,ANXA1,ANXA2,ANXA5,B4GALT1,BSG,CD44,CDH1,CTSB,CTS Z,DSG2,DSP,EFNB1,EZR,GDF15,HMGB1,HSP90B1,HSPA5,ITGB1,ITGB4,LAMA3,LGALS3BP,MARCKS,NCL,NME1,PCSK9,PKM,RACK1,S100A10,S100P,SERPINB2,SERPINB5,SERPINE1,SPTAN1,TFRC,TGFB1,TNFRSF6B,VCL                                                                                                           | 40 |
|                                               | Binding of tumor cell lines       | 1.58E-15 | Decreased | -2.643 | ACTN4,ADAM10,ALCAM,ANXA1,ANXA2,ANXA5,B4GALT1,BSG,CD44,CDH1,CTSB,CTS Z,DSG2,DSP,EFNB1,GDF15,HMGB1,HSP90B1,HSPA5,ITGB1,ITGB4,LAMA3,LGALS3BP,MARCKS,NCL,NME1,PCSK9,PKM,RACK1,S100A10,S100P,SERPINB2,SERPINB5,SERPINE1,SPTAN1,TFRC,TGFB1,TNFRSF6B,VCL                                                                                                               | 39 |
|                                               | Adhesion of tumor cell lines      | 2.56E-12 | Decreased | -2.239 | ACTN4,ADAM10,ALCAM,ANXA1,ANXA2,B4GALT1,BSG,CD44,CDH1,CTSB,CTS Z,DSG2,DSP,EFNB1,GDF15,HMGB1,ITGB1,LAMA3,MARCKS,NME1,PKM,RACK1,S100P,SERPINB2,SERPINB5,SERPINE1,SPTAN1,TGFB1,TNFRSF6B,VCL                                                                                                                                                                         | 30 |
|                                               | Cell-cell contact                 | 5.01E-12 | Decreased | -2.226 | ACTN1,ACTN4,ADAM10,ALCAM,ANXA1,ANXA5,APLP2,BCAM,C3,CALR,CAPZB,CD44,CDH1,CLSTN3,CLU,CTNNA1,CTSB,DSG2,DSP,FSCN1,GDF15,GPI,HSPA4,INHBA,ITGB1,ITGB4,JAG1,KLK6,LAMA3,LGALS1,LGMN,MSN,NECTIN1,NME1,NT5E,PLEC,PTPRF,RACK1,RDX,SOD1,STIP1,TGFB1,VCL,VIM,YWHAG                                                                                                           | 45 |

|                                |                                         |          |           |        |                                                                                                                                                                                                                                                                                                                                    |    |
|--------------------------------|-----------------------------------------|----------|-----------|--------|------------------------------------------------------------------------------------------------------------------------------------------------------------------------------------------------------------------------------------------------------------------------------------------------------------------------------------|----|
|                                | Binding of connective tissue cells      | 1.27E-10 | Decreased | -3.161 | ANXA2,CALR,CD44,CDH1,CLU,COL7A1,GSN,IGF2R,IGFBP2,ITGB1,JAG1,LAMA3,LGALS3BP,PDCD6IP,PLEC,SERPINB5,TGFB1,TGFBI,TGFBR3,VCL                                                                                                                                                                                                            | 20 |
|                                | Binding of endothelial cells            | 1.87E-10 | Decreased | -2.345 | ADAM10,ALCAM,ANXA2,ANXA5,C3,CD44,GDF15,HMGB1,HSPA5,ITGB1,KRT1,NT5E,RACK1,S100A10,SERPINB5,SERPINE1,TGFB1,TGFBI,TMSB10/TMSB4X,TNFRSF6B,VIM                                                                                                                                                                                          | 21 |
|                                | Binding of fibroblasts                  | 1.07E-09 | Decreased | -2.217 | CD44,CDH1,COL7A1,GSN,IGF2R,ITGB1,LGALS3BP,PLEC,SERPINB5,TGFB1,TGFBR3,VCL                                                                                                                                                                                                                                                           | 12 |
|                                | Activation of cells                     | 3.08E-09 | Decreased | -4.406 | ADAM10,AHNAK,ANXA1,ANXA2,B4GALT1,C3,CALR,CD44,CDH1,CFL1,CLIC1,CTSH,CTSL,FKBP1A,HMGB1,HNRNPD,HPRT1,HSP90B1,HSPA4,HSPD1,HSPH1,IGF2R,IL1RL1,INHBA,ITGB1,KRT18,KRT2,KRT8,LCN2,LGALS1,LGALS3BP,NT5E,PARP1,PKM,PLAT,PLTP,PPIA,PRDX1,PSME1,PSME2,SERPINA1,SERPINB9,SERPINE1,SERPINE2,SOD1,STC1,TGFB1,TGFBR3,TNFRSF6B,TPT1,UBE2N,VIM,YWHAZ | 53 |
|                                | Adhesion of connective tissue cells     | 7.81E-09 | Decreased | -3.121 | ANXA2,CALR,CD44,CDH1,CLU,COL7A1,IGF2R,ITGB1,JAG1,LAMA3,PDCD6IP,PLEC,SERPINB5,TGFB1,TGFBI,TGFBR3,VCL                                                                                                                                                                                                                                | 17 |
|                                | Binding of colorectal cancer cell lines | 2.71E-07 | Decreased | -2.558 | CD44,CDH1,DSG2,EFNB1,ITGB1,NME1,PKM,RACK1,S100A10,TFRC                                                                                                                                                                                                                                                                             | 10 |
|                                | Binding of hepatoma cell lines          | 3.53E-07 | Decreased | -2.616 | ALCAM,BSG,CD44,ITGB1,LAMA3,NME1,PCSK9                                                                                                                                                                                                                                                                                              | 7  |
|                                | Activation of blood cells               | 5.73E-07 | Decreased | -3.788 | ADAM10,AHNAK,ANXA1,ANXA2,C3,CALR,CD44,CLIC1,CTSH,CTSL,FKBP1A,HMGB1,HPRT1,HSP90B1,HSPA4,HSPD1,HSPH1,IGF2R,IL1RL1,INHBA,ITGB1,LCN2,LGALS1,LGALS3BP,NT5E,PARP1,PLAT,PPIA,PRDX1,PSME1,PSME2,SERPINB9,SERPINE2,SOD1,TGFB1,TNFRSF6B,TPT1,UBE2N,YWHAZ                                                                                     | 39 |
|                                | Cell-cell adhesion                      | 5.95E-07 | Decreased | -2.683 | ADAM10,ALCAM,BCAM,CD44,CDH1,DSG2,DSP,GPI,ITGB1,JAG1,KLK6,LAMA3,NECTIN1,NME1,NT5E,RACK1,TGFB1                                                                                                                                                                                                                                       | 17 |
| <b>Immune Cell Trafficking</b> | Cell movement of                        | 1.68E-07 | Decreased | -2.008 | ACTN4,ADAM10,ANXA1,ANXA2,BSG,C3,CALR,CD44,DEK,EFNB1,EZR,HMGB1,HNRNPL,HSPD1,INHBA,ITGB1,LCP1,LGALS1,LGMN,MSN,NQO1,NT5E,PLEC,PPIA,S100A4,SERPINA3                                                                                                                                                                                    | 30 |

|                                |                                       |          |           |       |                                                                                                                                                          |    |
|--------------------------------|---------------------------------------|----------|-----------|-------|----------------------------------------------------------------------------------------------------------------------------------------------------------|----|
|                                | mononuclear leukocytes                |          |           |       | ,SERPINE1,SERPINE2,TGFB1,TNFRSF6B                                                                                                                        |    |
| <b>Free Radical Scavenging</b> | Quantity of reactive oxygen species   | 5.23E-09 | Increased | 2.492 | CD44,CLU,CP,GLO1,HMGA1,HSPA4,LCN2,NQO1,PARK7,PFN1,PGD,PRDX1,PRDX2,PRDX5,PRDX6,SERPINB5,SOD1,STC1,TGFB1                                                   | 19 |
|                                | Production of reactive oxygen species | 2.06E-07 | Increased | 2.269 | ANXA1,ANXA2,ARHGDIA,ARHGDIB,C3,CD44,DBI,GSN,HMGB1,HNRNPK,HSP90AB1,ITGB4,LDHA,PARK7,PPIA,PRCP,PRDX1,PRDX2,RACK1,SERPINA3,SLC9A3R1,SOD1,TGFB1,TXNRD1,YWHAZ | 25 |

| II. BxPC3 (MYB vs. Neo) |                                  |          |                            |                    |                                                                                                                                                                                                                                                                                                                                                                                                                                                                                                                                                                                                                                                                                                                                                                                                                                                                                       |                     |
|-------------------------|----------------------------------|----------|----------------------------|--------------------|---------------------------------------------------------------------------------------------------------------------------------------------------------------------------------------------------------------------------------------------------------------------------------------------------------------------------------------------------------------------------------------------------------------------------------------------------------------------------------------------------------------------------------------------------------------------------------------------------------------------------------------------------------------------------------------------------------------------------------------------------------------------------------------------------------------------------------------------------------------------------------------|---------------------|
| Categories              | Diseases or Functions Annotation | p-Value  | Predicted Activation State | Activation z-score | Molecules                                                                                                                                                                                                                                                                                                                                                                                                                                                                                                                                                                                                                                                                                                                                                                                                                                                                             | Number of Molecules |
| Cell Death and Survival | Necrosis                         | 4.84E-33 | Decreased                  | -3.623             | AGR2,AHSA1,AIFM1,ALCAM,ALDH3A1,ANP32A,ANXA1,ANXA2,ANXA5,ARHGDI A,AXL,CBR1,CCT6A,CD44,CDC37,CFH,CLU,CNPY2,COL18A1,CTNNA1,CTSB,CTS Z,DEK,DNASE2,EEF1A1,EEF2,EIF5A,ELAVL1,ENO1,EPHA4,F3,FBLN1,FKBP4,FLNB,FUBP1,G6PD,GDF15,GLO1,GPC1,GPI,GRN,GSN,GSTP1,HLA-B,HMGB1,HMGB2,HNRNPA1,HNRNPH1,HNRNPK,HPRT1,HSP90AA1,HSP90AB1,HSPA1A/HSPA1B,HSPA4,HSPA5,HSPA8,HSPB1,HSPH1,HTRA1,IGF2R,IGFBP2,IGFBP5,IL1RL1,ILF2,INHBA,ITGB1,ITGB4,KLK6,KRT14,KRT18,LDHA,LMNB1,MDH1,NAMPT,NASP,NCL,NPM1,NQO1,OSMR,P4HB,PA2G4,PABPC1,PARP1,PCNA,PCSK9,PDCD5,PDCD6IP,PFN1,PKM,PLAT,PLAU,PPIA,PPT1,PRDX1,PRDX2,PRDX6,PSAP,PSMA6,PSMA7,PSMB1,PSMB5,PTGDS,PTPRF,RAD23B,RPLP0,RPS13,RPS3,S100A6,SDC4,SEMA3A,SEMA3B,SERPINA1,SERPINB2,SERPINB5,SERPINE2,SERPINF1,SET,SLC39A10,SNRPB,SOD2,SPP1,SRSF1,SSB,STIP1,STMN1,TFRC,TGFB1,TGFBR3,TGM2,THBS1,TIMP1,TMSB10/TMSB4X,TPT1,TRIM29,TUBB,TXNRD1,UBA1,UBE2L3,VAPA,VCP,XRCC6 | 141                 |
|                         | Cell death                       | 3.65E-30 | Decreased                  | -3.598             | ACTN4,AGR2,AHSA1,AIFM1,AKR1C3,ALCAM,ALDH3A1,ANP32A,ANXA1,ANXA2,ANXA5,ARHGDI A,ATP6AP1,AXL,BAS P1,BTF3,C1QBP,CACYBP,CANX,CBR1,CCT6A,CD44,CDC37,CFB,CFH,CFL1,CKMT1A/CKMT1B,CLU,CNPY2,COL18A1,CTNNA1,CTSB,CTS Z,DEK,DNASE2,EEF1A1,EEF2,EIF5A,ELAVL1,ENO1,EPHA4,F3,FBLN1,FKBP4,FLNB,FUBP1,G6PD,GDF15,GLO1,GPC1,GPI,GRN,GSN,GSTP1,HLA-B,HMGB1,HMGB2,HNRNPA1,HNRNPH1,HNRNPK,HPRT1,HSP90AA1,HSP90AB1,HSPA1A/HSPA1B,HSPA4,HSPA5,HSPA8,HSPB1,HSPH1,HTRA1,IGF2R,IGFBP2,IGFBP5,IL1RL1,ILF2,ILF3,INHBA,ITGB1,ITGB4,KLK6,KRT14,KRT18,LDHA,LMNB1,MDH1,NAMPT,NASP,NCL,NPM1,NQO1,OSMR,P4HB,PA2G4,PABPC1,PARP1,PCNA,PCSK9,PDCD5,PDCD6IP,PFN1,PKM,P                                                                                                                                                                                                                                                     | 156                 |

|                                |          |           |        |                                                                                                                                                                                                                                                                                                                                                                                                                                                                                                                                                                                                                                                                                                                                                                                                                         |                                                                                                                                                                                                                                                                                                                                                      |  |
|--------------------------------|----------|-----------|--------|-------------------------------------------------------------------------------------------------------------------------------------------------------------------------------------------------------------------------------------------------------------------------------------------------------------------------------------------------------------------------------------------------------------------------------------------------------------------------------------------------------------------------------------------------------------------------------------------------------------------------------------------------------------------------------------------------------------------------------------------------------------------------------------------------------------------------|------------------------------------------------------------------------------------------------------------------------------------------------------------------------------------------------------------------------------------------------------------------------------------------------------------------------------------------------------|--|
|                                |          |           |        |                                                                                                                                                                                                                                                                                                                                                                                                                                                                                                                                                                                                                                                                                                                                                                                                                         | LAT,PLAU,PPIA,PPIB,PPT1,PRDX1,PRDX2,PRDX6,PSAP,PSMA6,PSMA7,PSMB1,PSMB5,PTGDS,PTPRF,RAD23B,RPLP0,RPS13,RPS3,S100A6,SDC4,SEMA3A,SEMA3B,SERPINA1,SERPINB2,SERPINB5,SERPINE2,SERPINF1,SET,SLC39A10,SNRPB,SOD2,SPP1,SRSF1,SSB,STIP1,STMN1,TFRC,TGFB1,TGFBR3,TGM2,THBS1,TIMP1,TMSB10/TMSB4X,TPT1,TRIM29,TUBB,TXNDC5,TXNRD1,UBA1,UBE2L3,VAPA,VCP,XRCC6,YBX3 |  |
| Cell death of tumor cell lines | 1.33E-28 | Decreased | -2.856 | AGR2,AHSA1,AIFM1,ALCAM,ANXA2,ANXA5,ARHGDIAXL,CBR1,CCT6A,CD44,CDC37,CFH,CLU,CNPY2,COL18A1,CTSB,DEK,EEF1A1,EEF2,EIF5A,ELAVL1,ENO1,FBLN1,FLNB,FUBP1,G6PD,GDF15,GLO1,GPC1,GPI,GRN,GSN,GSTP1,HNRNPA1,HNRNPH1,HNRNPK,HSP90AB1,HSPA1A/HSPA1B,HSPA4,HSPA5,HSPA8,HSPB1,HTRA1,IGF2R,IGFBP2,IGFBP5,IL1RL1,ILF2,INHBA,ITGB1,ITGB4,KLK6,KRT14,KRT18,LMNB1,NAMPT,NASP,NCL,NPM1,NQO1,P4HB,PA2G4,PARP1,PCNA,PDCD6IP,PKM,PLAT,PLAU,PPIA,PPT1,PRDX1,PRDX2,PSAP,PTPRF,RAD23B,RPLP0,RPS3,S100A6,SDC4,SEMA3A,SEMA3B,SERPINB5,SERPINF1,SOD2,SPP1,SRSF1,SSB,STMN1,TFRC,TGFB1,TGFBR3,TGM2,THBS1,TIMP1,TMSB10/TMSB4X,TPT1,TRIM29,TXNRD1,UBE2L3,VCP                                                                                                                                                                                               | 101                                                                                                                                                                                                                                                                                                                                                  |  |
| Apoptosis                      | 1.39E-26 | Decreased | -3.064 | ACTN4,AHSA1,AIFM1,ALCAM,ALDH3A1,ANP32A,ANXA1,ANXA2,ANXA5,ARHGDIAXL,BASP1,BTF3,C1QBP,CANX,CD44,CDC37,CFH,CFL1,CKMT1A/CKMT1B,CLU,COL18A1,CTNNA1,CTSB,CTSZ,DEK,DNASE2,EEF1A1,EIF5A,ELAVL1,ENO1,EPHA4,F3,FBLN1,FKBP4,FLNB,FUBP1,G6PD,GDF15,GLO1,GPI,GRN,GSN,GSTP1,HLA-B,HMGB1,HMGB2,HNRNPA1,HNRNPH1,HNRNPK,HSP90AA1,HSP90AB1,HSPA1A/HSPA1B,HSPA4,HSPA5,HSPA8,HSPB1,HSPH1,HTRA1,IGF2R,IGFBP5,IL1RL1,ILF3,INHBA,ITGB1,ITGB4,KRT14,KRT18,LDHA,LMNB1,MDH1,NAMPT,NASP,NCL,NPM1,NQO1,OSMR,P4HB,PA2G4,PARP1,PCNA,PCSK9,PDCD5,PDCD6IP,PFN1,PKM,PLAT,PLAU,PPIA,PPT1,PRDX1,PRDX2,PRDX6,PSAP,PSMB1,PTGDS,PTPRF,RAD23B,RPLP0,RPS3,S100A6,SDC4,SEMA3A,SEMA3B,SERPINA1,SERPINB5,SERPINE2,SERPINF1,SET,SLC39A10,SOD2,SPP1,SRSF1,STIP1,STMN1,TFRC,TGFB1,TGFBR3,TGM2,THBS1,TIMP1,TMSB10/TMSB4X,TPT1,TRIM29,TXNDC5,TXNRD1,UBA1,VCP,XRCC6,YBX3 | 130                                                                                                                                                                                                                                                                                                                                                  |  |



|                                    |          |           |        |                                                                                                                                                                                                                                                                                                                                                                                                                                                                                                                        |    |
|------------------------------------|----------|-----------|--------|------------------------------------------------------------------------------------------------------------------------------------------------------------------------------------------------------------------------------------------------------------------------------------------------------------------------------------------------------------------------------------------------------------------------------------------------------------------------------------------------------------------------|----|
| Apoptosis of tumor cell lines      | 1.43E-23 | Decreased | -2.384 | AHSA1,AIFM1,ALCAM,ANXA2,ANXA5,ARHGDI,CD44,CD C37,CFH,CLU,COL18A1,CTSB,EEF1A1,ELAVL1,ENO1,FBLN1,FLNB,FUBP1,G6PD,GDF15,GLO1,GRN,GSN,GSTP1,HNRNPA1,HNRNPH1,HNRNPK,HSP90AB1,HSPA1A/HSPA1B,HSPA4,HSPA5,HSPA8,HSPB1,HTRA1,IGF2R,IGFBP5,IL1RL1,INHBA,ITGB1,ITGB4,KRT14,KRT18,LMNB1,NASP,NCL,NPM1,NQO1,P4HB,PA2G4,PARP1,PCNA,PDCD6IP,PKM,PLAT,PLAU,PPIA,PRDX1,PSAP,RAD23B,RPLP0,RPS3,S100A6,SDC4,SEMA3A,SEMA3B,SERPINB5,SERPINF1,SOD2,SPP1,SRSF1,STMN1,TFRC,TGFB1,TGFBR3,TGM2,THBS1,TIMP1,TMSB10/TMSB4X,TPT1,TRIM29,TXNRD1,VCP | 82 |
| Apoptosis of muscle cells          | 4.05E-07 | Decreased | -2.14  | ELAVL1,GSN,HLA-B,HMGB1,HSPB1,INHBA,MDH1,NAMPT,PARP1,PSMB1,PTGDS,S100A6,SERPINF1,SOD2,SPP1,TGFB1,TIMP1,TPT1                                                                                                                                                                                                                                                                                                                                                                                                             | 18 |
| Cell death of osteosarcoma cells   | 1.29E-06 | Decreased | -3.317 | EEF1A1,PABPC1,PSMA6,PSMA7,PSMB1,PSMB5,RPLP0,RPS13,RPS3,SNRPB,VCP                                                                                                                                                                                                                                                                                                                                                                                                                                                       | 11 |
| Cell survival                      | 6.95E-19 | Increased | 4.409  | ACTN4,AGR2,AIFM1,ALCAM,ANXA5,AXL,CALB2,CBR1,CD44,CFH,CLU,COCH,COL17A1,COL18A1,CTSB,ECM1,EEF2,ELAVL1,ENO1,EPHA4,FUBP1,GDF15,GPC1,GSTP1,HMGB1,HMGB2,HNRNPK,HNRNPU,HSP90AB1,HSPA1A/HSPA1B,HSPA4,HSPA5,HSPB1,IGF2R,IGFBP2,IGFBP5,IL1RL1,ITGB1,KLK6,LDHA,LMNB1,NAMPT,P4HB,PARP1,PCNA,PKM,PLAT,PLAU,PPIA,PPIB,PRCP,PRDX2,PRDX6,PSAP,PSMA1,PSMA6,PSMA7,PSMB4,PSMB5,PTPRF,S100A6,SERPINB2,SERPINB5,SERPINF1,SET,SNRPB,SOD2,SPP1,SRSF3,STMN1,TGFB1,TGM2,THBS1,TIMP1,TPT1,TRIM29,TUBB,TXNDC5,UBE2L3,USP14,VCP,XRCC6              | 82 |
| Cell viability of tumor cell lines | 2.28E-14 | Increased | 4.291  | ACTN4,AGR2,AIFM1,AXL,CBR1,CD44,CLU,ECM1,EEF2,ELAVL1,ENO1,EPHA4,FUBP1,GDF15,GPC1,GSTP1,HMGB1,HSP90AB1,HSPA1A/HSPA1B,HSPA5,HSPB1,IGF2R,IGFBP2,IGFBP5,ITGB1,KLK6,LDHA,LMNB1,NAMPT,P4HB,PARP1,PCNA,PKM,PLAT,PLAU,PRCP,PRDX2,PSAP,PSMA1,PSMA6,PSMB4,PTPRF,S100A6,SERPINB2,SERPINB5,SNRPB,SOD2,SPP1,SRSF3,TGFB1,TGM2,TRIM29,UBE2L3,VCP,XRCC6                                                                                                                                                                                 | 55 |
| Cell viability                     | 2.77E-14 | Increased | 4.152  | ACTN4,AGR2,AIFM1,ANXA5,AXL,CALB2,CBR1,CD44,CLU,COCH,COL17A1,CTSB,ECM1,EEF2,ELAVL1,ENO1,EPHA4,FU                                                                                                                                                                                                                                                                                                                                                                                                                        | 71 |

|                          |                    |          |           |       |                                                                                                                                                                                                                                                                                                                                                                                                                                                                                                                                                                                                                                                                                                                                                                                        |     |
|--------------------------|--------------------|----------|-----------|-------|----------------------------------------------------------------------------------------------------------------------------------------------------------------------------------------------------------------------------------------------------------------------------------------------------------------------------------------------------------------------------------------------------------------------------------------------------------------------------------------------------------------------------------------------------------------------------------------------------------------------------------------------------------------------------------------------------------------------------------------------------------------------------------------|-----|
|                          |                    |          |           |       | BP1,GDF15,GPC1,GSTP1,HMGB1,HMGB2,HNRNPK,HNRNPU,HSP90AB1,HSPA1A/HSPA1B,HSPA5,HSPB1,IGF2R,IGFBP2,IGFBP5,ITGB1,KLK6,LDHA,LMNB1,NAMPT,P4HB,PARP1,PCNA,PKM,PLAT,PLAU,PPIA,PRCP,PRDX2,PRDX6,PSAP,PSMA1,PSMA6,PSMB4,PTPRF,S100A6,SERPINB2,SERPINB5,SERPINF1,SNRPB,SOD2,SPP1,SRSF3,STMN1,TGFB1,TGM2,THBS1,TIMP1,TRIM29,TXNDC5,UBE2L3,USP14,VCP,XRCC6                                                                                                                                                                                                                                                                                                                                                                                                                                           |     |
|                          | Removal of cells   | 7.59E-08 | Increased | 2.573 | ANXA1,ANXA2,AXL,CD44,COCH,HMGB1,PLAT,PLAU,PTGDS,PTX3,TGFB1,TGM2                                                                                                                                                                                                                                                                                                                                                                                                                                                                                                                                                                                                                                                                                                                        | 12  |
| <b>Cellular Movement</b> | Cell movement      | 6.24E-31 | Increased | 3.719 | ACTN1,ACTN4,AGR2,AHICY,AHNAK,ALCAM,ANXA1,ANXA2,ANXA5,ARHGDIAXL,B4GAT1,C1QBP,CAP1,CD44,CFB,CFH,CFL1,CLU,COCH,COL17A1,COL18A1,CTNNA1,CTSB,CTSZ,DEK,DSTN,ECM1,ELAVL1,ENO1,EPHA4,EPPK1,F3,FGFBP1,FKBP4,FLNB,FSCN1,G6PD,GDF15,GLG1,GPC1,GPI,GRN,GSN,HMGB1,HMGB2,HNRNPAB,HNRNPK,HSP90AA1,HSP90AB1,HSPA1A/HSPA1B,HSPA5,HSPA8,HSPB1,HTRA1,IGF2R,IGFBP2,IGFBP5,IGHA1,IL1RL1,ILF3,INHBA,ITGB1,ITGB4,KLK6,KRT16,KRT2,KRT6B,LDHA,LMNB1,LMNB2,MAPRE1,MARCKS,NACA,NAMPT,NCL,NPM1,NQO1,OSMR,P4HB,PA2G4,PARP1,PDCD6IP,PFN1,PKM,PLAT,PLAU,PPIA,PPIB,PRCP,PRDX1,PRDX2,PRDX6,PTGDS,PTPRF,PTX3,RNH1,S100A2,S100A6,SDC4,SEMA3A,SEMA3B,SERPINA1,SERPINB2,SERPINB5,SERPINE2,SERPINF1,SLC9A3R1,SOD2,SORD,SPP1,SRSF1,ST13,STMN1,TGFB1,TGFBR3,TGM2,THBS1,TIMP1,TKT,TMSB10/TMSB4X,TPT1,TUBB,TXNRD1,USP14,VCP,WARS | 127 |
|                          | Migration of cells | 1.51E-25 | Increased | 3.452 | ACTN1,ACTN4,AHICY,AHNAK,ALCAM,ANXA1,ANXA2,ANXA5,ARHGDIAXL,B4GAT1,C1QBP,CAP1,CD44,CFB,CFH,CFL1,CLU,COCH,COL17A1,COL18A1,CTNNA1,CTSB,CTSZ,DEK,ECM1,ELAVL1,EPHA4,EPPK1,F3,FKBP4,FLNB,FSCN1,G6PD,GDF15,GLG1,GPC1,GPI,GRN,GSN,HMGB1,HNRNPK,HSP90AA1,HSP90AB1,HSPA1A/HSPA1B,HSPA5,HSPA8,HSPB1,HTRA1,IGF2R,IGFBP2,IGFBP5,IGHA1,IL1RL1,ILF3,INHBA,ITGB1,ITGB4,KLK6,KRT16,KRT2,KRT6B,LDHA,LMNB1,LMNB2,MAPRE1,MARCKS,NACA,NAMPT,NCL,NPM1,NQO1,OSMR,PA2G4,PARP1,PFN1,PKM,PLAT,PLAU,PPIA,PPIB,PRCP,PRDX1,PRDX2,PTGDS,PTPRF,PTX3,RNH1,S100A2,S100A6,SDC4,SEMA3A,SERPINA1,SERPINB2,SERPINB5,SERPINE2,SERPINF1,S                                                                                                                                                                                      | 111 |

|                                   |          |           |       |  |                                                                                                                                                                                                                                                                                                                                                                                                                                           |    |
|-----------------------------------|----------|-----------|-------|--|-------------------------------------------------------------------------------------------------------------------------------------------------------------------------------------------------------------------------------------------------------------------------------------------------------------------------------------------------------------------------------------------------------------------------------------------|----|
|                                   |          |           |       |  | LC9A3R1,SOD2,SPP1,STMN1,TGFB1,TGFBR3,TGM2,THBS1,TIMP1,TMSB10/TMSB4X,TPT1,TXNRD1,VCP,WARS                                                                                                                                                                                                                                                                                                                                                  |    |
| Invasion of cells                 | 1.91E-21 | Increased | 3.813 |  | ACTN4,AGR2,AHCY,AHNAK,ALCAM,ANXA1,ANXA2,ARHGDIA,ATP6AP1,AXL,B4GAT1,C1QBP,CAP1,CD44,CFH,CLU, COL18A1,CTSB,CTSZ,ECM1,F3,FBLN1,FSCN1,GDF15,GPC1, GPI,GRN,GSN,HMGB1,HNRNPAB,HSP90AA1,HSP90AB1,HSP A1A/HSPA1B,HSPA5,HTRA1,IGFBP2,ILF3,INHBA,ITGB1,ITG B4,KLK6,LDHA,MARCKS,NAMPT,NPM1,NQO1,PA2G4,PKM, PLAT,PLAU,PPIA,RNH1,S100A6,SDC4,SERPINA1,SERPINB5, SERPINE2,SERPINF1,SLC9A3R1,SOD2,SPP1,STMN1,TGFB1,T GFBR3,THBS1,TIMP1,TMSB10/TMSB4X,VCP | 68 |
| Invasion of tumor cell lines      | 9.59E-18 | Increased | 3.693 |  | ACTN4,AGR2,AHNAK,ALCAM,ANXA1,ARHGDIA,ATP6AP1, AXL,B4GAT1,CAP1,CD44,CFH,CLU, COL18A1,CTSB,CTSZ,E CM1,FBLN1,FSCN1,GDF15,GPI,GRN,HMGB1,HNRNPAB,HSP 90AA1,HSPA1A/HSPA1B,HTRA1,IGFBP2,ILF3,ITGB1,ITGB4, KLK6,LDHA,MARCKS,NAMPT,NPM1,PA2G4,PKM,PLAT,PL AU,S100A6,SDC4,SERPINA1,SERPINB5,SERPINE2,SERPINF1 ,SLC9A3R1,SOD2,SPP1,STMN1,TGFB1,TGFBR3,TIMP1,TMSB 10/TMSB4X,VCP                                                                       | 55 |
| Cell movement of tumor cell lines | 2.42E-16 | Increased | 3.908 |  | ACTN1,ACTN4,AGR2,AHNAK,ALCAM,ANXA1,ANXA2,AXL, B4GAT1,C1QBP,CAP1,CD44,CLU, COL18A1,CTSB,CTSZ,ECM 1,ELAVL1,EPHA4,F3,FLNB,FSCN1,GDF15,GPI,GRN,HMGB1, HNRNPK,HSP90AA1,HSPA1A/HSPA1B,HTRA1,IGFBP2,ILF3,I TGB1,ITGB4,KLK6,LDHA,MARCKS,NCL,NPM1,PA2G4,PFN1, PKM,PLAT,PLAU,PPIA,PRDX2,SDC4,SEMA3A,SERPINA1,SE RPINB5,SERPINF1,SLC9A3R1,SOD2,SPP1,STMN1,TGFB1,TG FBR3,TGM2,THBS1,TIMP1,VCP                                                         | 61 |
| Migration of tumor cell lines     | 1.14E-15 | Increased | 4.036 |  | ACTN1,ACTN4,AHNAK,ALCAM,ANXA1,ANXA2,AXL,B4GA T1,C1QBP,CD44,CLU, COL18A1,CTSB,CTSZ,ECM1,ELAVL1,E PHA4,F3,FLNB,FSCN1,GDF15,GPI,GRN,HNRNPK,HSP90AA1, HSPA1A/HSPA1B,HTRA1,IGFBP2,ILF3,ITGB1,ITGB4,KLK6,L DHA,NCL,NPM1,PKM,PLAT,PLAU,PPIA,PRDX2,SDC4,SEMA 3A,SERPINA1,SERPINF1,SLC9A3R1,SOD2,SPP1,STMN1,TGF B1,TGFBR3,TGM2,THBS1,TIMP1,VCP                                                                                                     | 54 |
| Migration of endothelial cells    | 3.02E-15 | Increased | 2.803 |  | ALCAM,ANXA1,ANXA2,AXL,CD44, COL18A1,F3,FLNB,G6PD ,GPC1,GPI,GRN,HMGB1,HSP90AB1,HSPA5,HSPB1,IGF2R,ITG B1,ITGB4,MARCKS,NCL,PKM,PLAU,S100A2,SDC4,SEMA3A, SERPINF1,SPP1,TGFB1,THBS1,TIMP1,TMSB10/TMSB4X,WA                                                                                                                                                                                                                                     | 33 |

|                                           |          |           |       |  |                                                                                                                                                                                                            |    |
|-------------------------------------------|----------|-----------|-------|--|------------------------------------------------------------------------------------------------------------------------------------------------------------------------------------------------------------|----|
|                                           |          |           |       |  | RS                                                                                                                                                                                                         |    |
| Cell movement of endothelial cells        | 6.66E-15 | Increased | 2.67  |  | ALCAM,ANXA1,ANXA2,AXL,CD44,COL18A1,F3,FLNB,G6PD,GPC1,GPI,GRN,HMGB1,HSP90AB1,HSPA5,HSPB1,IGF2R,IL1RL1,ITGB1,ITGB4,MARCKS,NCL,PKM,PLAU,S100A2,SDC4,SEMA3A,SERPINF1,SPP1,TGFB1,THBS1,TIMP1,TMSB10/TMSB4X,WARS | 34 |
| Migration of tumor cells                  | 6.68E-10 | Increased | 2.12  |  | ACTN4,AHICY,ALCAM,CD44,COL18A1,CTSB,F3,GSN,HMGB1,ITGB1,KLK6,PLAU,S100A2,S100A6,SERPINB2,SERPINB5,SPP1,TGFB1,THBS1,TIMP1                                                                                    | 20 |
| Cell movement of sarcoma cell lines       | 9.96E-10 | Increased | 3.237 |  | ACTN4,AHNAK,CD44,CTSB,FLNB,GPI,HNRNPK,ITGB1,PLAU,SERPINF1,SLC9A3R1,SOD2,STMN1,VCP                                                                                                                          | 14 |
| Cell movement of breast cancer cell lines | 7.04E-09 | Increased | 2.044 |  | ACTN1,ACTN4,AHNAK,ANXA1,ANXA2,AXL,CD44,ECM1,ELAVL1,GPI,ILF3,ITGB1,LDHA,PFN1,PLAU,SDC4,SEMA3A,SERPINA1,SERPINB5,SPP1,TGFB1,TGFBR3,TGM2,TIMP1                                                                | 24 |
| Homing of cells                           | 7.99E-09 | Increased | 2.5   |  | ACTN1,ANXA1,ANXA2,AXL,C1QBP,CD44,CLU,DEK,FGFBP1,FSCN1,GRN,GSN,HMGB1,HMGB2,IGF2R,INHBA,ITGB1,NQO1,PFN1,PLAT,PLAU,PPIA,PPIB,SEMA3A,SEMA3B,SERPINA1,SERPINF1,SPP1,ST13,TGFB1,THBS1,TMSB10/TMSB4X,USP14        | 33 |
| Migration of cancer cells                 | 1.32E-08 | Increased | 2.167 |  | AHICY,ALCAM,CD44,COL18A1,CTSB,F3,GSN,HMGB1,ITGB1,KLK6,PLAU,S100A2,S100A6,SERPINB5,SPP1,TGFB1,THBS1                                                                                                         | 17 |
| Invasion of breast cancer cell lines      | 1.78E-08 | Increased | 2.727 |  | AHNAK,AXL,CD44,CTSB,ECM1,FSCN1,GPI,HSP90AA1,ILF3,ITGB1,ITGB4,LDHA,NAMPT,PLAU,SERPINA1,SERPINB5,SLC9A3R1,SPP1,STMN1,TGFB1,TGFBR3,TIMP1                                                                      | 22 |
| Chemotaxis                                | 2.65E-08 |           | 2.518 |  | ACTN1,ANXA1,ANXA2,AXL,C1QBP,CD44,CLU,DEK,FGFBP1,GRN,GSN,HMGB1,HMGB2,IGF2R,INHBA,ITGB1,PFN1,PLAT,PLAU,PPIA,PPIB,SEMA3A,SEMA3B,SERPINA1,SERPINF1,SPP1,ST13,TGFB1,THBS1,TMSB10/TMSB4X,USP14                   | 31 |
| Cell movement of tumor cells              | 4.02E-08 |           | 2.434 |  | ALCAM,CD44,COL18A1,CTSB,F3,GSN,HMGB1,ITGB1,KLK6,PLAU,S100A2,S100A6,SERPINB5,SPP1,TGFB1,THBS1                                                                                                               | 16 |

|                                          |                                          |          |           |        |                                                                                                                                                                                                                                                                                                                                                                                                                                                  |    |
|------------------------------------------|------------------------------------------|----------|-----------|--------|--------------------------------------------------------------------------------------------------------------------------------------------------------------------------------------------------------------------------------------------------------------------------------------------------------------------------------------------------------------------------------------------------------------------------------------------------|----|
|                                          | Migration of sarcoma cell lines          | 5.88E-08 |           | 2.805  | ACTN4,AHNAK,CD44,FLNB,HNRNPK,PLAU,SERPINF1,SLC9A3R1,SOD2,STMN1,VCP                                                                                                                                                                                                                                                                                                                                                                               | 11 |
|                                          | Cell movement of cancer cells            | 6.32E-08 |           | 3.038  | ALCAM,CD44,COL18A1,CTSB,F3,GSN,HMGB1,KLK6,PLAU,S100A2,S100A6,SPP1,TGFB1,THBS1                                                                                                                                                                                                                                                                                                                                                                    | 14 |
|                                          | Cell movement of fibroblast cell lines   | 2.36E-07 |           | 2.8    | ACTN4,CD44,FGFBP1,FSCN1,GPC1,GPI,HMGB1,ITGB1,MAPRE1,NPM1,PLAU,PTGDS,SPP1,TGFB1,TGM2,THBS1                                                                                                                                                                                                                                                                                                                                                        | 16 |
|                                          | Cell movement of fibrosarcoma cell lines | 4.78E-07 |           | 2.752  | AHNAK,FLNB,GPI,HNRNPK,ITGB1,PLAU,SLC9A3R1,SOD2                                                                                                                                                                                                                                                                                                                                                                                                   | 8  |
|                                          | Invasion of colorectal cancer cell lines | 8.45E-07 |           | 2.932  | ANXA1,AXL,CD44,FSCN1,HSP90AA1,ITGB4,PLAU,STMN1,TGFB1,TMSB10/TMSB4X                                                                                                                                                                                                                                                                                                                                                                               | 10 |
| <b>Cellular Compromise</b>               | Degeneration of cells                    | 1.96E-07 | Decreased | -2.346 | AIFM1,ARHGDI1,AXL,CFL2,CLU,CTSB,GRN,HMGB2,HTRA1,KLK6,OSMR,PLAT,PLAU,PLOD1,PPT1,PSAP,SOD2,SPP1,STMN1,TFRC,TGFB1,TGM2                                                                                                                                                                                                                                                                                                                              | 22 |
| <b>Inflammatory Response</b>             | Aggregation of blood platelets           | 6.93E-08 | Increased | 2.014  | CFH,EPHA4,F3,GDF15,GSN,HMGB1,ITGB1,P4HB,PLAT,PRDX2,SEMA3A,SERPINE2,SERPINF1,TGFB1,THBS1,TIMP1                                                                                                                                                                                                                                                                                                                                                    | 16 |
| <b>Cellular Growth and Proliferation</b> | Cell proliferation of tumor cell lines   | 1.48E-23 | Increased | 3.959  | ACTN1,ACTN4,AHCY,AHNAK,AHSA1,AKR1C3,ALCAM,ANXA1,ANXA2,ATP6AP1,AXL,C1QBP,CACYBP,CD44,CDC37,CLU,COL18A1,CTSB,DEK,EEF1A1,EIF5A,ELAVL1,EPHA4,F3,FGFBP1,FKBP4,FSCN1,G6PD,GDF15,GOLM1,GPC1,GRN,GSTP1,HIST1H1D,HMGB1,HNRNPA1,HNRNPK,HSP90AA1,HSPA5,HSPB1,IGF2R,IGFBP2,IGFBP5,ILF2,ILF3,INHBA,ITGB1,ITGB4,KLK6,KRT14,LDHA,MAPRE1,NACA,NAMPT,NASP,NCL,NPM1,NQO1,PA2G4,PARP1,PCNA,PFN1,PKM,PLAT,PLAU,PPT1,PRDX2,PRKCSH,PSMB2,PTPRF,S100A6,SDC4,SEMA3B,SERP | 97 |

|                          |                       |          |           |       |                                                                                                                                                                                                                                                                                                                                                                                                      |    |
|--------------------------|-----------------------|----------|-----------|-------|------------------------------------------------------------------------------------------------------------------------------------------------------------------------------------------------------------------------------------------------------------------------------------------------------------------------------------------------------------------------------------------------------|----|
|                          |                       |          |           |       | INB2,SERPINB5,SERPINF1,SET,SLC9A3R1,SOD2,SPP1,SRSF1,SRSF3,SSB,STMN1,TES,TFRC,TGFB1,TGFBR3,TGM2,THBS1,TMSB10/TMSB4X,TPT1,TUBB,UAP1,UBA1,VCP,XRCC6                                                                                                                                                                                                                                                     |    |
|                          |                       |          | Increased | 2.822 | ACTN4,AHICY,ANXA1,ANXA2,C1QBP,CD44,CLU,EEF1A1,ELAVL1,F3,FGFBP1,GDF15,GPC1,GRN,HNRNPK,HSPA5,IGFBP2,IGFBP5,ILF3,INHBA,ITGB1,ITGB4,LDHA,NQO1,PA2G4,PFN1,PKM,PLAU,PRDX2,SEMA3B,SOD2,SPP1,TES,TGFB1,TGM2,TPT1,UBA1                                                                                                                                                                                        | 37 |
|                          |                       |          | Increased | 2.236 | ANXA1,ANXA2,AXL,C1QBP,CD44,CLU,COL18A1,F3,FSCN1,GDF15,GRN,HIST1H1D,HMGB1,IGF2R,INHBA,ITGB1,KRT14,MAPRE1,NASP,PKM,PLAU,S100A6,SEMA3B,SET,SPP1,STMN1,TGFB1,TGFBR3,TGM2                                                                                                                                                                                                                                 | 29 |
|                          |                       |          | Increased | 2.237 | ANXA2,CD44,CTSB,EPPK1,FBLN1,GPI,GRN,GSTP1,HSPA1A/HSPA1B,HSPB1,IGFBP5,INHBA,ITGB1,KLK6,KRT2,LMNB1,NPM1,PA2G4,PGK1,PLAT,PLAU,PTPRF,S100A6,SDC4,SERPINF1,SOD2,SPP1,STIP1,STMN1,TFG,TGFB1,TIMP1                                                                                                                                                                                                          | 32 |
|                          |                       |          | Increased | 2.275 | ANP32A,BASP1,CLU,CNPY2,EIF5A,FKBP4,GRN,HMGB1,HSP90AA1,ITGB1,LMNB1,MARCKS,NPM1,PARP1,PLAT,PSAP,PTPRF,PTPRS,SEMA3A,SERPINE2,SET,SOD2,TGM2,THBS1,VAPA                                                                                                                                                                                                                                                   | 25 |
|                          |                       |          | Increased | 2.163 | AHNAK,ANXA1,ARHGDIAXL,C1QBP,CD44,CTSZ,ELAVL1,FUBP1,GDF15,GPI,GSTP1,HMGB1,HPRT1,HSPA1A/HSPA1B,HSPA5,HSPA8,IGFBP2,IL1RL1,INHBA,ITGB1,NPM1,PARP1,PLAU,PPIA,PPL,PRDX2,RPS3,SDC4,SEMA3A,SERPINA1,SET,SLC39A10,SPP1,TALDO1,TFRC,TGFB1,THBS1,TPT1                                                                                                                                                           | 39 |
|                          |                       |          | Increased | 2.136 | AHNAK,ANXA1,ARHGDIAXL,C1QBP,CD44,CTSZ,ELAVL1,GPI,GSTP1,HMGB1,HPRT1,HSPA1A/HSPA1B,HSPA5,HSPA8,IGFBP2,IL1RL1,INHBA,ITGB1,NPM1,PARP1,PLAU,PPIA,PPL,PRDX2,RPS3,SDC4,SEMA3A,SERPINA1,SLC39A10,SPP1,TALDO1,TFRC,TGFB1,THBS1,TPT1                                                                                                                                                                           | 36 |
| <b>Protein Synthesis</b> | Metabolism of protein | 1.94E-23 | Increased | 2.85  | ALDH3A1,ANXA1,C1S,CANX,CCT6A,CDC37,CFL1,CLU,CTSA,CTSB,CTSZ,DDX39B,EEF1A1,EEF1G,EEF2,EIF4A2,EIF5A,ELAVL1,EPHA4,ERP44,FUCA2,GOLM1,GPC1,GSN,HIST1H1B,HIST2H4A,HNRNPD,HNRNPK,HSP90AA1,HSP90AB1,HSPA1A/HSPA1B,HSPA5,HSPA8,HSPB1,HTRA1,IGFBP2,IGFBP5,ILF3,INHBA,ITGB1,KLK6,MAN1B1,NACA,NCL,NPM1,NUCB1,P4HB,PABPC1,PCSK9,PFN1,PLAT,PLAU,PPIB,PRKCSH,PSMB5,RAB7A,RBMX,RPLP0,RPS13,RPS3,SDC4,SERPINA1,SERPINE | 76 |

|                                           |                                   |          |           |       |                                                                                                                                                                                                                                                                                                                                                                                                                                                                                     |    |
|-------------------------------------------|-----------------------------------|----------|-----------|-------|-------------------------------------------------------------------------------------------------------------------------------------------------------------------------------------------------------------------------------------------------------------------------------------------------------------------------------------------------------------------------------------------------------------------------------------------------------------------------------------|----|
|                                           |                                   |          |           |       | 2,SOD2,SPP1,SSB,STIP1,SYNCRIP,TGFB1,TGM2,THBS1,TIMP1,UBE2L3,USP14,VCP,WARS                                                                                                                                                                                                                                                                                                                                                                                                          |    |
|                                           | Synthesis of protein              | 2.02E-12 | Increased | 2.688 | ALDH3A1,ANXA1,DDX39B,EEF1A1,EEF1G,EEF2,EIF4A2,EIF5A,ELAVL1,GPC1,GSN,HNRNPD,HNRNPK,HSPA1A/HSPA1B,HSPA5,HSPB1,IGFBP2,IGFBP5,ILF3,INHBA,ITGB1,NCL,NPM1,PABPC1,RPLP0,RPS13,RPS3,SOD2,SPP1,SSB,STIP1,SYNCRIP,TGFB1,THBS1,WARS                                                                                                                                                                                                                                                            | 35 |
| <b>Cellular Assembly and Organization</b> | Organization of cytoplasm         | 4.26E-16 | Increased | 3.085 | ACTN1,ACTN4,AHNAK,ANP32A,ANXA1,ARHGDIAXL,B4GAT1,BASP1,C1QBP,CANX,CAP1,CAPZB,CD44,CFL1,CFL2,CLU,EEF1A1,EPHA4,EPPK1,F3,FKBP4,FLNB,FSCN1,GAA,GDF15,GPI,GRN,GSN,HEXA,HMGB1,HMGB2,HNRNPK,HPRT1,HSP90AA1,HSP90AB1,HSPB1,INHBA,ITGB1,ITGB4,KRT16,KRT18,KRT6B,KRT6C,KRT9,LMNB1,MAPRE1,MARCKS,NECTIN1,NQO1,PARP1,PFN1,PKM,PLAT,PLAU,PLS3,PPT1,PRKCSH,PTK7,PTPRF,PTPRS,PTX3,RPS3,SDC4,SEMA3A,SERPINB5,SERPINF1,SLC9A3R1,SOD2,SPP1,STIP1,STMN1,TGFB1,TGM2,THBS1,TMSB10/TMSB4X,TUBB,TXNRD1,VAPA | 79 |
|                                           | Organization of cytoskeleton      | 2.77E-15 | Increased | 2.966 | ACTN1,ACTN4,AHNAK,ANP32A,ANXA1,ARHGDIAXL,B4GAT1,BASP1,C1QBP,CANX,CAP1,CAPZB,CD44,CFL1,CFL2,CLU,EEF1A1,EPHA4,EPPK1,F3,FKBP4,FLNB,FSCN1,GDF15,GPI,GRN,GSN,HMGB1,HMGB2,HNRNPK,HPRT1,HSP90AA1,HSP90AB1,HSPB1,INHBA,ITGB1,ITGB4,KRT16,KRT18,KRT6B,KRT6C,KRT9,LMNB1,MAPRE1,MARCKS,NECTIN1,NQO1,PFN1,PKM,PLAT,PLAU,PLS3,PRKCSH,PTK7,PTPRF,PTPRS,RPS3,SDC4,SEMA3A,SERPINB5,SERPINF1,SLC9A3R1,SPP1,STIP1,STMN1,TGFB1,TGM2,THBS1,TMSB10/TMSB4X,TUBB,TXNRD1,VAPA                               | 73 |
|                                           | Microtubule dynamics              | 1.71E-10 | Increased | 2.317 | ACTN4,AHNAK,ANP32A,ARHGDIAXL,B4GAT1,BASP1,C1QBP,CANX,CAP1,CAPZB,CD44,CFL1,CLU,EEF1A1,EPHA4,FKBP4,FSCN1,GDF15,GRN,GSN,HMGB1,HMGB2,HNRNPK,HPRT1,HSP90AA1,HSP90AB1,HSPB1,INHBA,ITGB1,ITGB4,KRT18,LMNB1,MAPRE1,MARCKS,NECTIN1,NQO1,PFN1,PKM,PLAT,PLAU,PRKCSH,PTK7,PTPRF,PTPRS,RPS3,SDC4,SEMA3A,SERPINF1,SLC9A3R1,STIP1,STMN1,TGFB1,THBS1,TUBB,TXNRD1,VAPA                                                                                                                               | 57 |
|                                           | Formation of cellular protrusions | 2.22E-09 | Increased | 2.911 | ACTN4,AHNAK,ARHGDIAXL,B4GAT1,BASP1,C1QBP,CAP1,CAPZB,CD44,CFL1,CLU,EEF1A1,EPHA4,FSCN1,GDF15,GRN,GSN,HMGB1,HMGB2,HNRNPK,HPRT1,HSP90AA1,HSP90AB1,H                                                                                                                                                                                                                                                                                                                                     | 46 |

|                                               |                                    |          |           |       |                                                                                                                                                                                 |    |
|-----------------------------------------------|------------------------------------|----------|-----------|-------|---------------------------------------------------------------------------------------------------------------------------------------------------------------------------------|----|
|                                               |                                    |          |           |       | SPB1,INHBA,ITGB1,ITGB4,LMNB1,MARCKS,NECTIN1,PFN1,PLAT,PLAU,PRKCSH,PTK7,PTPRF,SDC4,SEMA3A,SERPINF1,SLC9A3R1,STIP1,STMN1,TGFB1,THBS1,TXNRD1,VAPA                                  |    |
|                                               | Organization of actin cytoskeleton | 5.26E-08 | Increased | 3.083 | ACTN1,ANXA1,ARHGDI A,AXL,CAP1,CFL1,CFL2,CLU,EPHA4,FLNB,FSCN1,GPI,GSN,ITGB1,PLAU,PLS3,PTK7,SLC9A3R1,TGFB1,TGM2,TMSB10/TMSB4X                                                     | 21 |
|                                               | Reorganization of cytoskeleton     | 7.79E-08 | Increased | 2.88  | ANXA1,ARHGDI A,AXL,CD44,CFL1,EPHA4,F3,HMGB1,MARCKS,PLAU,PLS3,PTK7,PTPRF,SERPINB5,SPP1,TGFB1                                                                                     | 16 |
| <b>Cell-To-Cell Signaling and Interaction</b> | Binding of tumor cell lines        | 2.78E-11 | Increased | 2.862 | ACTN4,ALCAM,ANXA1,ANXA2,ANXA5,C1QBP,CD44,CFH,CTSB,CTS Z,F3,GDF15,HMGB1,HSPA5,ITGB1,ITGB4,MARCKS,NCL,PCSK9,PKM,PLAU,SEMA3A,SERPINB2,SERPINB5,SERPINF1,SPP1,TFRC,TGFB1,TGM2,THBS1 | 30 |
|                                               | Adhesion of tumor cell lines       | 2.62E-08 | Increased | 2.527 | ACTN4,ALCAM,ANXA1,ANXA2,C1QBP,CD44,CFH,CTSB,CTS Z,GDF15,HMGB1,ITGB1,MARCKS,PKM,PLAU,SEMA3A,SERPINB2,SERPINB5,SPP1,TGFB1,TGM2,THBS1                                              | 22 |
|                                               | Aggregation of blood platelets     | 6.93E-08 | Increased | 2.014 | CFH,EPHA4,F3,GDF15,GSN,HMGB1,ITGB1,P4HB,PLAT,PRDX2,SEMA3A,SERPINE2,SERPINF1,TGFB1,THBS1,TIMP1                                                                                   | 16 |



**Supplementary Table 4:** List of canonical pathways altered upon MYB-silencing and MYB-upregulation

| <b>MiaPaCa (Scr vs shMYB)</b>               |                      |              |                |                                                                                                                                                            |
|---------------------------------------------|----------------------|--------------|----------------|------------------------------------------------------------------------------------------------------------------------------------------------------------|
| <b>Ingenuity Canonical Pathways</b>         | <b>-log(p-value)</b> | <b>Ratio</b> | <b>z-score</b> | <b>Molecules</b>                                                                                                                                           |
| Remodeling of Epithelial Adherens Junctions | 11.7                 | 0.203        | #NUM!          | TUBA1B,NME1,TUBB4B,MAPRE1,CTNNA1,RAB7A,TUBB,CDH1,ARPC3,ACTN4,VCL,ACTG1,ACTA1,ACTN1                                                                         |
| Protein Ubiquitination Pathway              | 10.6                 | 0.0868       | #NUM!          | PSMB4,PSMA6,PSMB5,PSMA7,HSPH1,UBE2N,HLA-B,HSPA1A/HSPA1B,PSME2,PSMA1,HSPD1,PSMB6,HSPA5,HSPA4,HSP90B1,PSME1,HSP90AB1,DNAJB11,PSMB1,HSP90AA1,UBA1,PSMA2,HSPB1 |
| Glycolysis I                                | 9.99                 | 0.346        | -3             | PGK1,ENO1,GPI,TPI1,ENO3,PGAM1,PKM,ALDOA,GAPDH                                                                                                              |
| Phagosome Maturation                        | 8.95                 | 0.108        | #NUM!          | CALR,TUBA1B,PRDX1,TUBB4B,PRDX5,HLA-B,RAB7A,TUBB,PRDX6,CTSZ,CTSD,CTSA,CTSL,CTSH,CTSB,PRDX2                                                                  |
| Gluconeogenesis I                           | 8.47                 | 0.308        | -2.828         | PGK1,ENO1,GPI,ENO3,PGAM1,ALDOA,GAPDH,MDH1                                                                                                                  |
| ILK Signaling                               | 7.17                 | 0.0812       | -2.673         | ITGB1,FLNB,CFL1,VIM,CDH1,CFL2,KRT18,ITGB4,ACTN4,VCL,TMSB10/TMSB4X,ACTG1,ACTA1,ACTN1,DSP,NACA                                                               |
| Glucocorticoid Receptor Signaling           | 7.03                 | 0.0609       | #NUM!          | KRT16,YWHAH,KRT17,KRT7,KRT9,HSPA1A/HSPA1B,KRT5,HSPA5,HMGB1,HSPA4,HSP90B1,KRT8,HSP90AB1,TGFB1,ANXA1,KRT19,HSP90AA1,KRT18,KRT2,KRT1,SERPINE1                 |
| RhoGDI Signaling                            | 7                    | 0.0847       | 1.604          | ITGB1,CFL1,RACK1,GDI2,RDX,ARHGDIB,CDH1,CFL2,EZR,CD44,ARPC3,ARHGDIA,ACTG1,ACTA1,MSN                                                                         |
| PI3K/AKT Signaling                          | 6.98                 | 0.1          | -3.464         | YWHAQ,ITGB1,HSP90B1,CDC37,YWHAG,YWHAE,YWHAH,HSP90AB1,YWHAB,GDF15,YWHAZ,HSP90AA1,SFN                                                                        |

|                                                   |      |        |        |                                                                                            |
|---------------------------------------------------|------|--------|--------|--------------------------------------------------------------------------------------------|
| Germ Cell-Sertoli Cell Junction Signaling         | 6.94 | 0.0838 | #NUM!  | ITGB1,TUBA1B,CFL1,TUBB4B,CTNNA1,TUBB,GSN,CDH1,CFL2,TGFB1,ACTN4,VCL,ACTG1,ACTN1,ACTA1       |
| Pentose Phosphate Pathway                         | 6.46 | 0.455  | -2.236 | PGD,TKT,PGLS,TALDO1,H6PD                                                                   |
| Epithelial Adherens Junction Signaling            | 6.26 | 0.0867 | #NUM!  | TUBA1B,TUBB4B,TGFBR3,CTNNA1,TUBB,CDH1,ARPC3,NECTIN1,ACTN4,VCL,ACTG1,ACTA1,ACTN1            |
| Sertoli Cell-Sertoli Cell Junction Signaling      | 6    | 0.0761 | #NUM!  | ITGB1,TUBA1B,TUBB4B,TGFBR3,CTNNA1,TUBB,CDH1,NECTIN1,SPTAN1,ACTN4,VCL,ACTG1,ACTA1,ACTN1     |
| 14-3-3-mediated Signaling                         | 5.87 | 0.0876 | -2.121 | YWHAQ,TUBA1B,YWHAG,YWHAE,YWHAH,YWHAB,TUBB4B,YWHAZ,VIM,SFN,TUBB,PDCD6IP                     |
| Unfolded protein response                         | 5.69 | 0.143  | #NUM!  | HSPA4,CALR,HSP90B1,PDIA6,HSPH1,HSPA1A/HSPA1B,VCP,HSPA5                                     |
| Actin Cytoskeleton Signaling                      | 5.48 | 0.0644 | -2.324 | ITGB1,PFN1,CFL1,RDX,GSN,CFL2,EZR,ARPC3,ACTN4,VCL,TMSB10/TMSB4X,ACTG1,ACTN1,ACTA1,MSN       |
| Granzyme A Signaling                              | 4.98 | 0.25   | #NUM!  | HIST1H1B,ANP32A,SET,NME1,HIST1H1D                                                          |
| Cell Cycle: G2/M DNA Damage Checkpoint Regulation | 4.98 | 0.14   | -1     | YWHAQ,YWHAG,YWHAE,YWHAH,YWHAB,YWHAZ,SFN                                                    |
| Pentose Phosphate Pathway (Oxidative Branch)      | 4.85 | 0.75   | #NUM!  | PGD,PGLS,H6PD                                                                              |
| Myc Mediated Apoptosis Signaling                  | 4.68 | 0.105  | #NUM!  | YWHAQ,YWHAG,YWHAE,YWHAH,YWHAB,YWHAZ,CYCS,SFN                                               |
| Sirtuin Signaling Pathway                         | 4.32 | 0.0514 | -1.941 | PGK1,TUBA1B,NQO1,SOD1,LDHB,PARP1,HIST1H1B,CDH1,PGAM1,XRCC6,ADAM10,HIST1H1D,NAMPT,LDHA,GOT2 |
| IGF-1 Signaling                                   | 4.28 | 0.0811 | #NUM!  | YWHAQ,IGFBP6,YWHAG,YWHAE,YWHAH,YWHAB,YWHAZ,SFN,IGFBP2                                      |
| HIPPO signaling                                   | 4.25 | 0.092  | 1.414  | YWHAQ,YWHAG,YWHAH,YWHAE,YWHAB,YWHAZ,CD44,SFN                                               |

|                                           |      |        |        |                                                                                    |
|-------------------------------------------|------|--------|--------|------------------------------------------------------------------------------------|
| Aldosterone Signaling in Epithelial Cells | 4.24 | 0.0655 | #NUM!  | HSPA4,HSP90B1,HSP90AB1,DNAJB11,HSPH1,HSPA1A/HSPA1B,HSP90AA1,HSPD1,HSPA5,HSPB1,AHCY |
| NRF2-mediated Oxidative Stress Response   | 4.2  | 0.06   | -2.236 | PRDX1,DNAJB11,STIP1,VCP,NQO1,SOD1,ACTG1,GSTO1,CBR1,TXNRD1,ACTA1,GSTP1              |
| Aryl Hydrocarbon Receptor Signaling       | 4.16 | 0.0704 | 0.447  | CTSD,HSP90B1,ALDH1A1,HSP90AB1,TGFB1,NQO1,HSP90AA1,GSTO1,GSTP1,HSPB1                |
| Granzyme B Signaling                      | 4.07 | 0.25   | -2     | LMNB2,CYCS,LMNB1,PARP1                                                             |
| Death Receptor Signaling                  | 4.04 | 0.086  | -1.414 | LMNA,CYCS,SPTAN1,ACTG1,ACTA1,ARHGDIB,PARP1,HSPB1                                   |
| ERK5 Signaling                            | 3.97 | 0.0986 | -1.89  | YWHAQ,YWHAG,YWHAH,YWHAZ,SFN                                                        |
| Aspartate Degradation II                  | 3.92 | 0.429  | #NUM!  | GOT1,GOT2,MDH1                                                                     |
| RhoA Signaling                            | 3.9  | 0.0726 | -3     | PFN1,CFL1,CFL2,EZR,RDX,ARPC3,ACTG1,ACTA1,MSN                                       |
| Signaling by Rho Family GTPases           | 3.84 | 0.0516 | -2.53  | STMN1,ITGB1,CDH1,CFL2,CFL1,EZR,RACK1,RDX,ARPC3,VIM,ACTG1,ACTA1,MSN                 |
| Guanine and Guanosine Salvage I           | 3.63 | 1      | #NUM!  | PNP,HPRT1                                                                          |
| SPINK1 Pancreatic Cancer Pathway          | 3.51 | 0.1    | 0.816  | CELA3A,CTSA,TGFB1,CTSB,KLK6,CPA4                                                   |
| autophagy                                 | 3.44 | 0.0968 | #NUM!  | CTSZ,CTSD,CTSA,CTSL,CTSH,CTSB                                                      |
| Mechanisms of Viral Exit from Host Cells  | 3.41 | 0.122  | #NUM!  | LMNB2,PDCD6IP,ACTG1,LMNB1,ACTA1                                                    |
| Leukocyte Extravasation Signaling         | 3.37 | 0.0521 | -2.53  | ITGB1,EZR,CTNNA1,CD44,RDX,VCL,ACTN4,ACTG1,ACTN1,ACTA1,MSN                          |
| Regulation of Actin-based Motility by Rho | 3.33 | 0.0778 | -2.236 | ITGB1,PFN1,CFL1,ARPC3,ARHGDIA,GSN,ACTA1                                            |
| L-cysteine Degradation III                | 3.16 | 0.667  | #NUM!  | GOT1,GOT2                                                                          |
| Glutamate Degradation II                  | 3.16 | 0.667  | #NUM!  | GOT1,GOT2                                                                          |
| Aspartate Biosynthesis                    | 3.16 | 0.667  | #NUM!  | GOT1,GOT2                                                                          |
| Caveolar-mediated Endocytosis Signaling   | 3.12 | 0.0845 | #NUM!  | ITGB1,FLNB,HLA-B,ITGB4,ACTG1,ACTA1                                                 |
| Ephrin B Signaling                        | 3.06 | 0.0822 | #NUM!  | CFL1,CFL2,EFNB1,RACK1,CAP1,HNRNPK                                                  |

|                                                |      |        |       |                                                         |
|------------------------------------------------|------|--------|-------|---------------------------------------------------------|
| Hypoxia Signaling in the Cardiovascular System | 2.99 | 0.08   | #NUM! | HSP90B1,HSP90AB1,UBE2N,NQO1,HSP90AA1,LDHA               |
| Tight Junction Signaling                       | 2.95 | 0.0539 | #NUM! | TGFB1,NUDT21,VAPA,CTNNA1,NECTIN1,VCL,SPTAN1,ACTG1,ACTA1 |
| p70S6K Signaling                               | 2.88 | 0.058  | #NUM! | YWHAQ,YWHAG,YWHAE,YWHAH,EEF2,YWHAB,YWHAZ,SFN            |
| Arsenate Detoxification I (Glutaredoxin)       | 2.86 | 0.5    | #NUM! | PNP,GSTO1                                               |
| L-cysteine Degradation I                       | 2.86 | 0.5    | #NUM! | GOT1,GOT2                                               |

| <b>BxPC3 (Neo vs MYB)</b>                    |                      |              |                |                                                                                                                                 |
|----------------------------------------------|----------------------|--------------|----------------|---------------------------------------------------------------------------------------------------------------------------------|
| <b>Ingenuity Canonical Pathways</b>          | <b>-log(p-value)</b> | <b>Ratio</b> | <b>z-score</b> | <b>Molecules</b>                                                                                                                |
| Protein Ubiquitination Pathway               | 8.77                 | 0.0717       | #NUM!          | PSMB4,PSMA6,USP14,PSMB5,PSMA7,HSPH1,HLA-B,HSPA1A/HSPA1B,PSMA1,HSPA5,HSPA8,HSPA4,UBE2L3,HSP90AB1,PSMB2,PSMB1,HSP90AA1,UBA1,HSPB1 |
| Glycolysis I                                 | 7.55                 | 0.269        | 2.646          | PGK1,ENO1,GPI,ENO3,PGAM1,PKM,ENO2                                                                                               |
| Gluconeogenesis I                            | 7.55                 | 0.269        | 2.646          | PGK1,ENO1,GPI,ENO3,PGAM1,ENO2,MDH1                                                                                              |
| Phagosome Maturation                         | 7.2                  | 0.0878       | #NUM!          | CTSZ,TUBA1B,CTSA,PRDX1,TUBB4B,HLA-B,RAB7A,CTSB,CANX,TUBB,ATP6AP1,PRDX6,PRDX2                                                    |
| Glucocorticoid Receptor Signaling            | 6.92                 | 0.0551       | #NUM!          | KRT14,KRT16,KRT6B,KRT9,HSPA1A/HSPA1B,HSPA5,HSPA8,HMGB1,KRT6C,HSPA4,HSP90AB1,TGFB1,ANXA1,FKBP4,HSP90AA1,KRT18,PLAU,KRT2,KRT1     |
| Remodeling of Epithelial Adherens Junctions  | 6.62                 | 0.13         | #NUM!          | TUBA1B,TUBB4B,MAPRE1,CTNNA1,RAB7A,ACTN4,TUBB,ACTN1,ACTA1                                                                        |
| Unfolded protein response                    | 6.26                 | 0.143        | #NUM!          | HSPA8,HSPA4,P4HB,HSPH1,HSPA1A/HSPA1B,VCP,CANX,HSPA5                                                                             |
| NRF2-mediated Oxidative Stress Response      | 5.7                  | 0.065        | 2.828          | USP14,PPIB,PRDX1,NQO1,TXNRD1,GSTO1,SOD2,STIP1,VCP,HACD3,GSTP1,CBR1,ACTA1                                                        |
| Germ Cell-Sertoli Cell Junction Signaling    | 5.44                 | 0.067        | #NUM!          | ITGB1,TUBA1B,CFL1,CFL2,TGFB1,TUBB4B,CTNNA1,ACTN4,TUBB,GSN,ACTN1,ACTA1                                                           |
| Granzyme A Signaling                         | 5.35                 | 0.25         | #NUM!          | HIST1H1B,SET,ANP32A,HIST1H1D,HMGB2                                                                                              |
| Pentose Phosphate Pathway                    | 5.09                 | 0.364        | 2              | TKT,PGLS,TALDO1,G6PD                                                                                                            |
| SPINK1 Pancreatic Cancer Pathway             | 4.94                 | 0.117        | -0.378         | CELA3A,CTSA,TGFB1,CTSB,KLK6,CPA4,KLK10                                                                                          |
| Sertoli Cell-Sertoli Cell Junction Signaling | 4.57                 | 0.0598       | #NUM!          | ITGB1,TUBA1B,TUBB4B,TGFB3,CTNNA1,YBX3,NECTIN1,ACTN4,TUBB,ACTN1,ACTA1                                                            |
| ILK Signaling                                | 4.3                  | 0.0558       | 2.111          | ITGB1,FLNB,CFL1,CFL2,KRT18,ACTN4,ITGB4,TMSB10/TMSB4X,ACTN1,ACTA1,NACA                                                           |
| Aryl Hydrocarbon                             | 4.03                 | 0.0634       | -2             | TGM2,HSP90AB1,TGFB1,NQO1,HSP90AA1,ALDH3A1,GSTO1,G                                                                               |

|                                                |      |        |        |                                                                                |
|------------------------------------------------|------|--------|--------|--------------------------------------------------------------------------------|
| Receptor Signaling                             |      |        |        | STP1,HSPB1                                                                     |
| Osteoarthritis Pathway                         | 4.01 | 0.0519 | 0.378  | HMGB1,ITGB1,SPP1,IL1RL1,TGFB1,ANXA5,CTNNA1,NAMPT,ANXA2,SDC4,HTRA1              |
| Complement System                              | 3.98 | 0.135  | -0.447 | C1R,C1S,CFB,C1QBP,CFH                                                          |
| Sirtuin Signaling Pathway                      | 3.96 | 0.0445 | 2.111  | HIST1H1B,PGK1,TUBA1B,SOD2,PGAM1,XRCC6,NQO1,G6PD,HIST1H1D,NAMPT,LDHA,LDHB,PARP1 |
| Epithelial Adherens Junction Signaling         | 3.85 | 0.06   | #NUM!  | TUBA1B,TUBB4B,TGFBR3,CTNNA1,NECTIN1,ACTN4,TUBB,ACTN1,ACTA1                     |
| Aldosterone Signaling in Epithelial Cells      | 3.48 | 0.0536 | #NUM!  | HSPA8,HSPA4,HSP90AB1,HSPH1,HSPA1A/HSPA1B,HSP90AA1,HSPA5,HSPB1,AHCY             |
| Hypoxia Signaling in the Cardiovascular System | 3.39 | 0.08   | #NUM!  | UBE2L3,P4HB,HSP90AB1,NQO1,HSP90AA1,LDHA                                        |
| Pentose Phosphate Pathway (Oxidative Branch)   | 3.02 | 0.5    | #NUM!  | PGLS,G6PD                                                                      |
| Coagulation System                             | 3    | 0.114  | 1      | SERPINA1,PLAU,F3,PLAT                                                          |
| Granzyme B Signaling                           | 2.99 | 0.188  | #NUM!  | LMNB2,LMNB1,PARP1                                                              |
| Regulation of Actin-based Motility by Rho      | 2.97 | 0.0667 | 2      | ITGB1,PFN1,CFL1,ARHGDI,GSN,ACTA1                                               |
| Mechanisms of Viral Exit from Host Cells       | 2.74 | 0.0976 | #NUM!  | LMNB2,PDCD6IP,LMNB1,ACTA1                                                      |
| Acute Phase Response Signaling                 | 2.7  | 0.0455 | 1.342  | C1R,SOD2,C1S,SERPINF1,CFB,SERPINA1,OSMR,HNRNPK                                 |
| Caveolar-mediated Endocytosis Signaling        | 2.66 | 0.0704 | #NUM!  | ITGB1,FLNB,HLA-B,ITGB4,ACTA1                                                   |
| Pyruvate Fermentation to Lactate               | 2.63 | 0.333  | #NUM!  | LDHA,LDHB                                                                      |
| EIF2 Signaling                                 | 2.56 | 0.0396 | #NUM!  | PABPC1,WARS,RPS13,HNRNPA1,EIF4A2,HSPA5,RPS3,ACTA1,RPLP0                        |
| p53 Signaling                                  | 2.51 | 0.0541 | 0      | PCNA,THBS1,SERPINB5,ST13,TRIM29,SERPINE2                                       |
| Actin Cytoskeleton Signaling                   | 2.49 | 0.0386 | 1.667  | ITGB1,PFN1,CFL1,CFL2,ACTN4,GSN,TMSB10/TMSB4X,ACTN1,ACTA1                       |
| VDR/RXR Activation                             | 2.48 | 0.0641 | #NUM!  | SPP1,IL1RL1,KLK6,IGFBP5,SEMA3B                                                 |

|                                                              |      |        |       |                                                  |
|--------------------------------------------------------------|------|--------|-------|--------------------------------------------------|
| Pentose Phosphate Pathway (Non-oxidative Branch)             | 2.48 | 0.286  | #NUM! | TKT,TALDO1                                       |
| Virus Entry via Endocytic Pathways                           | 2.41 | 0.0517 | #NUM! | ITGB1,FLNB,HLA-B,TFRC,ITGB4,ACTA1                |
| Superoxide Radicals Degradation                              | 2.36 | 0.25   | #NUM! | SOD2,NQO1                                        |
| Semaphorin Signaling in Neurons                              | 2.33 | 0.0755 | #NUM! | ITGB1,SEMA3A,CFL1,CFL2                           |
| Clathrin-mediated Endocytosis Signaling                      | 2.27 | 0.0386 | #NUM! | HSPA8,ITGB1,RAB7A,TFRC,SERPINA1,ITGB4,CLU,ACTA1  |
| Tight Junction Signaling                                     | 2.23 | 0.0419 | #NUM! | TGFB1,NUDT21,VAPA,CTNNA1,YBX3,NECTIN1,ACTA1      |
| Atherosclerosis Signaling                                    | 2.22 | 0.0472 | #NUM! | TGFB1,SERPINA1,COL18A1,F3,CLU,GLG1               |
| RhoGDI Signaling                                             | 2.1  | 0.0395 | 0.378 | ITGB1,CFL1,CFL2,CD44,GDI2,ARHGDI,ACTA1           |
| UDP-N-acetyl-D-galactosamine Biosynthesis II                 | 2.08 | 0.182  | #NUM! | GPI,UAP1                                         |
| BER pathway                                                  | 2    | 0.167  | #NUM! | PCNA,PARP1                                       |
| Hepatic Fibrosis / Hepatic Stellate Cell Activation          | 1.97 | 0.0374 | #NUM! | COL5A2,IL1RL1,TGFB1,TIMP1,IGFBP5,COL18A1,COL17A1 |
| Bile Acid Biosynthesis, Neutral Pathway                      | 1.94 | 0.154  | #NUM! | AKR1C1/AKR1C2,AKR1C3                             |
| Antigen Presentation Pathway                                 | 1.9  | 0.0789 | #NUM! | PSMB5,HLA-B,CANX                                 |
| Sorbitol Degradation I                                       | 1.89 | 1      | #NUM! | SORD                                             |
| DNA Double-Strand Break Repair by Non-Homologous End Joining | 1.87 | 0.143  | #NUM! | XRCC6,PARP1                                      |

**Supplementary Table 5:** Networks associated with MYB-alteration in MiaPaCa and BxPC3

| <b>MiaPaCa (Scr vs shMYB)</b> |                                                                                                                                                                                                                                                                                                                    |              |                        |                                                                                          |
|-------------------------------|--------------------------------------------------------------------------------------------------------------------------------------------------------------------------------------------------------------------------------------------------------------------------------------------------------------------|--------------|------------------------|------------------------------------------------------------------------------------------|
| <b>ID</b>                     | <b>Molecules in Network</b>                                                                                                                                                                                                                                                                                        | <b>Score</b> | <b>Focus Molecules</b> | <b>Top Diseases and Functions</b>                                                        |
| 1                             | ANXA5,Cdc2,CLIC1,CNN2,Cytokeratin ,DSP,ECM1,ERK,GARS,GPI,HPRT1,ITGB4,Keratin,KRT1,KRT16,KRT17,KRT18,KRT19,KRT2,KRT5,KRT7,KRT8,KRT9,MAPRE1,PA2G4,PLEC,PLS3,PPA1,PRKAA,S100,SFN,TCF,TES,UBE2N,VIM                                                                                                                    | 48           | 28                     | [Cell Morphology, Embryonic Development, Hair and Skin Development and Function]         |
| 2                             | 14-3-3 ( $\beta,\epsilon,\zeta$ ),14-3-3( $\beta,\gamma,\theta,\eta,\zeta$ ),14-3-3( $\eta,\theta,\zeta$ ),BTF3,CACYBP,CAPZA1,CDC37,Ck2,EEF1A1,EEF1D,EEF1G,EEF2,FSCN1,Gsk3,HNRNPA2B1,HNRNPC,LGMN,mediator,MINPP1,PCDH7,PGK1,phosphatase,PTPRF,RPLP0,RPLP2,SET,snRNP,SSBP1,TPI1,YWHAB,YWHAE,YWHAG,YWHAH,YWHAQ,YWHAZ | 46           | 27                     | [Protein Synthesis, Protein Trafficking, Cellular Assembly and Organization]             |
| 3                             | Alpha actin,APC/APC2,ATPase,Collagen Alpha1,CP,cytochrome-c oxidase,DDX39B,EIF4A2,Ferritin,GAPDH,GOT,GOT1,GOT2,HNRNPD,HNRNPK,HSPD1,IgG,KHSRP,LDHA,LDL-cholesterol,LGALS1,NUDT21,OLA1,OSMR,P38 MAPK,PABPC1,PCBP1,PTBP1,RBMX,SERPINB9,SRSF1,SRSF3,TNFRSF6B,TRA2B,UAP1                                                | 41           | 25                     | [RNA Post-Transcriptional Modification, RNA Damage and Repair, Protein Synthesis]        |
| 4                             | arginase,CALB2,CANT1,CD109,CELA3A,DNA-methyltransferase,Ecm,elastase,FAM3C,FBLN1,FGFBP1,H6PD,HDL,HDL-cholesterol,hemoglobin,HEXA,HEXB,HNRNPAB,HTRA1,IGF2R,IL23,Inhibin,NAMPT,PCSK9,PLTP,PNP,PRSS22,RNH1,SAA,Serine Protease,SERPINA1,SERPINA3,TFPI,TGFB1,TGFBR3                                                    | 39           | 24                     | [Cellular Compromise, Inflammatory Response, Connective Tissue Development and Function] |



|   |                                                                                                                                                                                                                                                                                                                       |    |    |                                                                                |
|---|-----------------------------------------------------------------------------------------------------------------------------------------------------------------------------------------------------------------------------------------------------------------------------------------------------------------------|----|----|--------------------------------------------------------------------------------|
| 5 | ANXA1,CBX3,CD3,ENO1,HIST1H2BB,HIST2H2AA3/HIST2H2AA4,HIST2H2AB,Histone h4,HMGA1,HNRNPA3,HS3ST1,HSPA1A/HSPA1B,LDHB,LMNA,LMNB1,LRR C59,Mek,NCL,p85 (pik3r),PARP1,Rnr,RPA,RPS13,RPS3,S100A4,SFPQ,Shc,SNRPB,Sos,SRC (family),SSB,SYNCRIP,TCR,thymidine kinase,XRCC6                                                        | 39 | 24 | [Cell Cycle, DNA Replication, Recombination, and Repair, Cellular Development] |
| 6 | 14-3-3,ACTN4,AHNAK,Alpha Actinin,Alpha tubulin,ANXA2,BETA TUBULIN,CAPZB,CCT6A,CDK4/6,DNA-PK,Dynein,EEF1B2,EFNB1,Enolase,FLNB,Gamma tubulin,Mapk,Pak,PLOD1,PLOD3,PPL,S100A10,SPTAN1,STMN1,TALDO1,TBCA,TPT1,TUBA1B,TUBB,TUBB4B,tubulin,tubulin (family),Vdac,WARS                                                       | 32 | 21 | [Amino Acid Metabolism, Small Molecule Biochemistry, Molecular Transport]      |
| 7 | ADAM10,BSG,CLSTN3,COL6A2,COL7A1,collagen,Collagen type I,Collagen type IV,DSG2,Hsp27,Immunoproteasome Pa28/20s,INHBA,JAG1,JINK1/2,MAP2K1/2,MARCKS,Mmp,NID2,Notch,Pdgf (complex),PLAT,Proteasome PA700/20s,PSMB,PSMB1,PSMB4,PSMB6,PSME2,Secretase gamma,SERPINB2,SERPINE1,SERPINE2,SERPINH1,Tgf beta,Tnf (family),Vegf | 28 | 19 | [Organismal Injury and Abnormalities, Tissue Development, Cancer]              |
| 8 | 20s proteasome,26s Proteasome,ALDH1A1,ALDOA,Complement,Cyclin E,ENO3,Fc gamma receptor,Hif1,HLA-B,HSP90B1,HSPH1,Iga,IL12 (complex),LGALS3BP,LMNB2,MAP1LC3,MHC Class I (complex),MHC CLASS I (family),MHC Class II (complex),NACA,NT5E,PSMA,PSMA1,PSMA2,PSMA6,PSMA7,PSMB5,PSME1,RAS,SOD1,Tlr,UBA1,Ubiquitin,VCP        | 28 | 19 | [Developmental Disorder, Hereditary Disorder, Neurological Disease]            |

|    |                                                                                                                                                                                                                                                                                                                |    |    |                                                                                                   |
|----|----------------------------------------------------------------------------------------------------------------------------------------------------------------------------------------------------------------------------------------------------------------------------------------------------------------|----|----|---------------------------------------------------------------------------------------------------|
| 9  | ACTA1,ACTG1,Actin,ALCAM,aldo,Arp2/3,CAP1,CFL1,CFL2,Cofilin,COTL1,DSTN,F Actin,Filamin,G-Actin,GLA,Igh (family),Integrin $\beta$ ,KYNU,Lamin,Lamin b,LCP1,MIR200,NFkB (complex),PDCD5,PFN1,Profilin,S100A11,S100P,Talin,TMSB10/TMSB4X,TMSB4,Tropomyosin,TXNDC17,TXNRD1                                          | 26 | 18 | [Cellular Assembly and Organization, Cellular Compromise, Dermatological Diseases and Conditions] |
| 10 | AHCY,APLP2,ARHGDI2,CK1,Cr3,Eif4g,Erm,EZR,EZR-MSN-RDX,Fgf,Fgfr,Fibrinogen,GDI2,GLG1,GSN,Integrin,Lfa-1,MSN,Pglycoprotein,PDIA4,PEBP1,Pkc(s),PLA2,Rab11,RAB11A,Rab5,RAB7A,RDX,Rhogdi,Rock,SLC9A3R1,SUB1,TFRC,VCL,Wnt                                                                                             | 24 | 17 | [Cellular Assembly and Organization, Cell Morphology, Cellular Function and Maintenance]          |
| 11 | ACTN1,Ap2,ARPC3,Cadherin,Calmodulin,CAPZA2,CBR1,CD44,CDH1,CG,CTNNA1,Cyclin D,CYCS,estrogen receptor,Focal adhesion kinase,FSH,Histone h3,HSP90AA1,HSP90AB1,HSPA5,HSPB1,Insulin,Lh,MTORC1,PKM,PLC,PRKCSH,Proinsulin,PYGB,Ras homolog,Rb,RNA polymerase II,Rsk,TPM3,TXNDC12                                      | 24 | 17 | [Cancer, Neurological Disease, Organismal Injury and Abnormalities]                               |
| 12 | Abl1/2,Alpha 1 antitrypsin,C1q,C1R,calpain,CALR,Cathepsin,chymotrypsin,Collagen type II,Collagen type III,Collagen(s),Complement component 1,CPA4,CTSA,CTSB,CTSD,CTSH,CTSL,CTS,ENaC,ERK1/2,Fibrin,gelatinase,GGCT,Kallikrein,Laminin (complex),LRG1,MIP1,NECTIN1,PDGF (family),PDIA6,PSAT1,PTX3,trypsin,TXNDC5 | 22 | 16 | [Cellular Compromise, Inflammatory Response, Post-Translational Modification]                     |

|    |                                                                                                                                                                                                                                                                                                                          |    |    |                                                                                                                |
|----|--------------------------------------------------------------------------------------------------------------------------------------------------------------------------------------------------------------------------------------------------------------------------------------------------------------------------|----|----|----------------------------------------------------------------------------------------------------------------|
| 13 | Akt,ARHGDIB,B4GALT1,BCAM,BCR (complex),Collagen type VI,EFHD2,Fcer1,GDF15,glutathione transferase,GST,GSTO1,KLK6,LAMA3,LAMB1,Laminin (family),Laminin 511,Laminin1,MDH1,N-Cadherin,Nfat (family),PI3K (family),Pkg,PLC gamma,PRCP,Ptk,PTK7,Rap1,SEMA3B,SERPINB5,Smad,SYK/ZAP,TGFBI,TK T,VitaminD3-VDR-RXR                | 22 | 16 | [Hair and Skin Development and Function, Organismal Injury and Abnormalities, Tissue Development]              |
| 14 | Adaptor protein 1,ANP32A,Apoptosome,Cbp/p300,Ctbp,DEK,E2f,EGLN,GC-GCR dimer,Hat,HDGF,HIST1H1B,HIST1H1D,HIST1H2BD,HIST1H3A,HIST2H4A,HISTONE,histone deacetylase,Histone H1,HMGA2,Ikb,IL1RL1,INTERLEUKIN,Jnk,N-cor,NASP,NME1,P-TEFb,PGAM1,RAN,SET complex,Smad2/3,STC1,TH2 Cytokine,Top2                                   | 20 | 15 | [Cell Cycle, Cellular Assembly and Organization, Cellular Function and Maintenance]                            |
| 15 | Alpha catenin,DBI,DDT,Dynamin,glutathione peroxidase,Growth hormone,GSTP1,Igfbp,IGFBP2,IGFBP6,JAK,Ldh (complex),LRP,MHC II,NADPH oxidase,NFkB (family),Ngf,NQO1,PARK7,PCDH1,peroxidase (miscellaneous),PI3K (complex),PI3K p85,plasminogen activator,PPIA,PRDX1,PRDX2,PRDX5,PRDX6,PSAP,Sod,SUMO,SUMO2,TGFBR,Tnf receptor | 20 | 15 | [Endocrine System Disorders, Organismal Injury and Abnormalities, Free Radical Scavenging]                     |
| 16 | AKR1C1/AKR1C2,Alp,AMPK,Ap1,C3,chemokine,CLU,Cyclin A,cytokine,DNASE2,HMGB1,Ifn,IFN Beta,Ifn gamma,Ige,IgG1,IgG2a,Igm,IL1,IL12 (family),Immunoglobulin,Interferon alpha,ITGB1,LCN2,LDL,MVP,Nr1h,PD CD6IP,Pro-inflammatory Cytokine,Rac,SEMA4B,STAT5a/b,TAGLN2,TFG,TINAGL1                                                 | 16 | 13 | [Cell-To-Cell Signaling and Interaction, Hematological System Development and Function, Inflammatory Response] |

|    |                                                                                                                                                                                                                                                                                                        |    |    |                                                                                            |
|----|--------------------------------------------------------------------------------------------------------------------------------------------------------------------------------------------------------------------------------------------------------------------------------------------------------|----|----|--------------------------------------------------------------------------------------------|
| 17 | ACTBL2,ADAMTSL1,Adaptor protein 2,ARFGEF1,BRCA1,CFTR,DPM1,EGF,EPHA7,EPOR,EPPK1,FHL2,FN3KRP,GTPase,HIST3H2A,IKK (complex),MCM2,MDH2,Metalloprotease,NDUFS1,NME1-NME2,OAF,Pdgfr,PGD,PPP6R3,RAB3GAP2,RACK1,RASGRF1,RIN1,RNH1,SRC,TMEM189-UBE2V1,UBXN1,VAPA,YWHAH                                          | 13 | 11 | [Cell-To-Cell Signaling and Interaction, Cellular Movement, Nucleic Acid Metabolism]       |
| 18 | ADRB,Calcineurin protein(s),CaMKII,caspase,Collagen type V,Creb,Cyclin B,cytochrome C,DNAJB11,ERP44,FKBP1A,GLO1,HS P,Hsp70,Hsp90,HSPA4,ITPR,Mlc,NFAT (complex),NMDA Receptor,Nos,p70 S6k,PARP,PDGF BB,Pka,Pka catalytic subunit,PP2A,Ppp2c,RACK1,Raf,Sapk,ST13,STIP1,TSH,voltage-gated calcium channel | 8  | 8  | [Cardiovascular System Development and Function, Embryonic Development, Organ Development] |
| 19 | ARAP1,ARHGAP1,ATAD3A,BCAR1,CALB1,EIF2B4,ENAH,HNRNPL,MARK3,MARK4,MED1,MGP,MICAL3,NCOR1,NCOR2,NEDD4L,NEDD8-MDP1,NOTCH2NLA/NOTCH2NLB,NRIP1,PARD3,PDE3B,PGLS,PPP2R1B,PRKCI,PTPRJ,QSOX2,RARA,RPS17,Rxr,SEMA3B,SPATA6,TBL1X,TBL1XR1,TRIM25,WT1                                                               | 4  | 5  | [Cell Morphology, Drug Metabolism, Lipid Metabolism]                                       |

| <b>BxPC3 (Neo vs MYB)</b> |                                                                                                                                                                                                                        |              |                        |                                         |
|---------------------------|------------------------------------------------------------------------------------------------------------------------------------------------------------------------------------------------------------------------|--------------|------------------------|-----------------------------------------|
| <b>ID</b>                 | <b>Molecules in Network</b>                                                                                                                                                                                            | <b>Score</b> | <b>Focus Molecules</b> | <b>Top Diseases and Functions</b>       |
| 1                         | AHNAK,ANXA5,B4GAT1,CALB2,CDK4/6,Collagen Alpha1,ECM1,ERP44,FGFBP1,GARS,GPI,HNRNPH1,HPRT1,Iga,IGF2R,IGHA1,INHBA,Inhibin,KRT1,KRT16,Lamin,MDH1,PA2G4,PGK1,PLOD1,PLS3,PPA1,PPL,RNH1,Smad,TALDO1,TCF,Tgf beta,TGFB1,TGFBR3 | 48           | 27                     | [Cellular Movement, Cancer, Cell Cycle] |

|   |                                                                                                                                                                                                                                                                                                  |    |    |                                                                                 |
|---|--------------------------------------------------------------------------------------------------------------------------------------------------------------------------------------------------------------------------------------------------------------------------------------------------|----|----|---------------------------------------------------------------------------------|
| 2 | ACTA1,ACTBL2,Actin,ACTN1,AHCY, Alpha actin,Alpha Actinin,Alpha catenin,ANXA2,ARHGDI A,ATP6AP1,B ASP1,CAPZA1,CAPZA2,CAPZB,CTN NA1,Eif4g,F Actin,FLNB,FSCN1,GDI2,GSN,HNRNP A3,Keratin II, 6,MAPRE1,MARCKS,PCDH7,PDCD6I P,Pkc(s),RAB7A,Rho gdi,STIP1,TES,TKT,TPM4                                   | 46 | 26 | [Cell Signaling, Post-Translational Modification, Protein Synthesis]            |
| 3 | AMPK,BTF3,CCT6A,CG,Ck2,DEK,EE F1A1,EEF1G,EEF2,EIF5A,FSH,GANA B,Gsk3,HSP90AA1,HSP90AB1,HSPA4, HSPA8,HSPB1,HSPH1,Insulin,LFNG,L h,LMNB2,NUCKS1,PCSK9,PKM,Proin sulin,PSAT1,PTPRF,PTPRS,Secretase gamma,UBA1,UBE2L3,VAPA,VCP                                                                        | 46 | 26 | [Post-Translational Modification, Protein Folding, Cellular Compromise]         |
| 4 | 14-3-3,Calcineurin protein(s),CaMKII,DDX39B,DNA- methyltransferase,EGLN,EIF4A2,EPPK1 ,HNRNPA1,HNRNPAB,HNRNPD,HNR NPK,HNRNPR,HNRNPU,ILF2,ILF3,N CL,Nfat (family),PABPC1,PCNA,PGAM1,Pka,R af,Rb,Rnr,RPA,RPS13,RPS3,SRSF1,SR SF3,SYNCRIP,TFIIH,UAP1,XRCC6,Y BX3                                     | 38 | 23 | [RNA Post-Transcriptional Modification, Protein Synthesis, Infectious Diseases] |
| 5 | 20s proteasome,26s Proteasome,ALDH3A1,CTSA,Cytokerati n,FUBP1,HEXA,Ikb,Immunoproteasome Pa28/20s,Jnk,Keratin,KRT14,KRT2,KR T6B,KRT6C,KRT9,MAP1LC3,MHC CLASS I (family),OSMR,Proteasome PA700/20s,PSAP,PSMA,PSMA1,PSMA 6,PSMA7,PSMB,PSMB1,PSMB2,PSMB 4,PSMB5,PTGDS,RAD23B,TXNRD1,U biquitin,USP14 | 36 | 22 | [Post-Translational Modification, Cancer, Organismal Injury and Abnormalities]  |

|   |                                                                                                                                                                                                                                                                                                                                          |    |    |                                                                                    |
|---|------------------------------------------------------------------------------------------------------------------------------------------------------------------------------------------------------------------------------------------------------------------------------------------------------------------------------------------|----|----|------------------------------------------------------------------------------------|
| 6 | AGR2,Akt,arginase,CAP1,CFL1,CFL2,Cofilin,Collagen type III,Collagen type V,Collagen type VI,DNA-PK,DSTN,EPHA4,G-Actin,hemoglobin,Kallikrein,LRG1,Pak,peptidylprolyl isomerase,peroxidase (miscellaneous),PFN1,Pkg,PPIA,PPT1,PRCP,PRDX1,PRDX2,PRDX6,PTK7,Rock,SLC39A10,SLC9A3R1,Tropomyosin, TXNDC17, TXNDC5                              | 29 | 19 | [Cellular Assembly and Organization, Cellular Compromise, Free Radical Scavenging] |
| 7 | Alpha tubulin,ANP32A,BETA TUBULIN,CACYBP,Cbp/p300,Cytoplasmic Dynein,Dynein,ERK,FKBP4,HIST1H1B,HIST1H1D,Histone H1,HMGB2,HS3ST1,NASP,NUCB1,NUDT21,P-TEFb,p38 Sapk,PP2A,Ppp2c,S100,S100A2,S100A6,SET,SET complex,Smad2/3,STMN1,TMSB10/TMSB4X,TMSB4,TPT1,TUBA1B,TUBB,TUBB4B,tubulin (family)                                               | 29 | 19 | [Cancer, Organismal Injury and Abnormalities, Reproductive System Disease]         |
| 8 | AHSA1,AIFM1,AXL,caspase,CDC37,CK1,CLU,cytochrome C,cytochrome-c oxidase,DBI,GAA,GLO1,glutathione transferase,GST,GSTO1,GSTP1,Hsp27,Hsp70,Hsp90,HSPA1A/HSPA1B,Ldh (complex),LDHA,LDHB,Mitochondrial complex 1,NACA,NAMPT,Ngf,Nos,NUDC,P38 MAPK,PARP,RBMX,Sod,SOD2,ST13                                                                    | 29 | 19 | [Neurological Disease, Drug Metabolism, Protein Synthesis]                         |
| 9 | Adaptor protein 1,AKR1C1/AKR1C2,AKR1C3,Aldose Reductase,Cathepsin,CBR1,CTSB,CTSZ,ENO1,ENO2,ENO3,Enolase,ERK1/2,G6PD,glutathione peroxidase,GPC1,IL1RL1,INTERLEUKIN,JINK1/2,Laminin (family),MIP1,N-Cadherin,N-cor,NADH or NADPH:quinone oxidoreductase,NECTIN1,NQO1,Pdi,Rar,Rxr,SEMA3A,SEMA3B,SERPINF1,T3-TR-RXR,VitaminD3-VDR-RXR,Vla-4 | 23 | 16 | [Cancer, Endocrine System Disorders, Gastrointestinal Disease]                     |

|    |                                                                                                                                                                                                                                                                                                                                     |    |    |                                                                                                                         |
|----|-------------------------------------------------------------------------------------------------------------------------------------------------------------------------------------------------------------------------------------------------------------------------------------------------------------------------------------|----|----|-------------------------------------------------------------------------------------------------------------------------|
| 10 | Alpha 1 antitrypsin,C1q,C1R,C1RL,C1S,CELA3 A,CFH,Collagen type II,Collagen(s),Complement,Complement component 1,elastase,ENaC,FBLN1,growth factor,HTRA1,IGFBP5,KLK10,KLK6,Laminin (complex),Laminin1,LRP,MAC,MAN1B1,PI3K (complex),plasminogen activator,PLAT,Profilin,PTX3,Rap1,Serine Protease,SERPINA1,SERPINB5,SERPINE2,trypsin | 23 | 16 | [Cancer, Organismal Injury and Abnormalities, Ophthalmic Disease]                                                       |
| 11 | ATPase,BCR (complex),CANX,CD3,CD44,cytokine,Focal adhesion kinase,FUCA2,HSPA5,Igm,IKK (complex),ITGB4,Mek,Na <sup>+</sup> ,K <sup>+</sup> - ATPase,NPM1,OLA1,P-glycoprotein,p85 (pik3r),Pdgfr,PI3K (family),PPIB,PRKCSH,Rac,RAS,Ras homolog,RPLP0,Rsk,SDC4,Shc,SNRPB,Sos,SRC (family),SSB,TCR,TXNDC12                               | 19 | 14 | [Protein Synthesis, Cellular Movement, Cell Morphology]                                                                 |
| 12 | ANXA1,Ap1,CFB,COL18A1,Collagen type I,Collagen type IV,Cyclin A,Cyclin D,Cyclin E,E2f,estrogen receptor,F3,Growth hormone,IL1,ITGB1,LDL,Mmp,NADPH oxidase,NFAT (complex),NID2,p70 S6k,Pdgf (complex),PDGFBB,PLA2,PLAU,PLC gamma,SERPINB2,SPP1,SYK/ZAP,TGM2,TIMP1,TRA2B,TSH,Vegf,WARS                                                | 17 | 13 | [Cardiovascular System Development and Function, Organismal Development, Hematological System Development and Function] |
| 13 | ACTN4,ALCAM,c-Src,calpain,COL17A1,COL5A2,collagen ,Ecm,Fgf,Fgfr,Fibrin,Fibrinogen,Filamin,GDF15,GLA,Hif1,IGFBP2,Igh (family),Integrin,Integrin alpha 3 beta 1,Integrin alpha 4 beta 1,Integrin alpha 5 beta 3,Integrin $\beta$ ,Iti,KYNU,Lfa-1,MAP2K1/2,NFkB (complex),P4HB,PDCD5,Ptk,Rab5,Talin ,TGFB,THBS1                        | 14 | 11 | [Organ Morphology, Renal and Urological System Development and Function, Dermatological Diseases and Conditions]        |

|    |                                                                                                                                                                                                                                                                                                                                  |    |    |                                                                                                     |
|----|----------------------------------------------------------------------------------------------------------------------------------------------------------------------------------------------------------------------------------------------------------------------------------------------------------------------------------|----|----|-----------------------------------------------------------------------------------------------------|
| 14 | ADA,ARG1,CCNE1,DDX21,dinoprost,DNAJB6,DSP,ESR1,FHL2,HACD3,HIST1H2BD,HNRNPAB,HNRNPM,IGF2,KRT18,MCM2,MMS19,MSN,NME1-NME2,PDIA3,PGLS,PYGB,RARA,RPL13,RPL5,RPS13,RRP1B,SERBP1,SHH,SORD,steroid,TCF7L2,TGM2,VCP,XBP1                                                                                                                  | 14 | 11 | [Cellular Assembly and Organization, Cellular Function and Maintenance, Immunological Disease]      |
| 15 | Cdc2,chemokine,Cyclin B,DNASE2,GOLM1,GOT,GRN,HLA-B,HMGB1,HSP,Ifn,IFN Beta,Ifn gamma,Ige,IgG,IgG1,IL12 (complex),IL12 (family),IL23,Immunoglobulin,Interferon alpha,KRT18,Mapk,MHC Class I (complex),MHC Class II (complex),MHC II,Pro-inflammatory Cytokine,STAT5a/b,TFG,TFRC,Tlr,Tnf (family),Tnf receptor,Top2,TRIM29          | 11 | 9  | [Connective Tissue Disorders, Immunological Disease, Inflammatory Disease]                          |
| 16 | advanced glycation end-products,APP,ATF1,ATP1A3,C1QBP,CASP12,CASP8,CKMT1A/CKMT1B,Clathrin,CNPY2,COCH,CPA4,cytokine,ENPP1,ETV4,FGF2,GLG1,HIST1H2BB,HLA-B,HMOX2,HOMER2,HTT,IL27,MAC, Metalloprotease,MHC Class I (complex),MHC Class II (complex),NDRG2,NDUFS4,NLRP12,NOG,PDPK1,phospholipid,TMEM30A,voltage-gated calcium channel | 9  | 8  | [Cell Death and Survival, Cellular Compromise, Nervous System Development and Function]             |
| 17 | ADRB,Alp,Calmodulin,CIITA,Creb,ELAVL1,epoprostenol,FDFT1,GIP,GLOD4,GNRH,Hdac,HDL,HDL-cholesterol,HIST2H4A,HISTONE,histone deacetylase,Histone h3,Histone h4,HLA Class I,KIR3DL1,LMNB1,Mlc,MTORC1,NDRG2,NMDA Receptor,PARP1,PEMT,PLC,polyphosphate,RNA polymerase II,TAPBP,TMEM189-UBE2V1,TRIB3,tubulin                           | 6  | 6  | [Connective Tissue Disorders, Organismal Injury and Abnormalities, Skeletal and Muscular Disorders] |



|    |                            |   |   |                                                                               |
|----|----------------------------|---|---|-------------------------------------------------------------------------------|
| 18 | HNRNPCL3/HNRNPCL4,METTL18  | 2 | 1 | [Cancer, Endocrine System Disorders, Organismal Injury and Abnormalities]     |
| 19 | NEDD8-MDP1,SLC25A32,SPATA6 | 2 | 1 | [Organismal Injury and Abnormalities, Amino Acid Metabolism, Drug Metabolism] |

**Supplementary Table 6:** List of proteins common in MiaPaCa (Scr vs. shMYB) and BxPC3 (Neo vs MYB) secretome filtered using IPA-Biomarker tool

| <b>Symbol</b>  | <b>Family</b>           | <b>GI Number</b> | <b>MiaPaCa (Scr vs shMYB)</b> | <b>BxPC3 (Neo vs MYB)</b> |
|----------------|-------------------------|------------------|-------------------------------|---------------------------|
| AHCY           | enzyme                  | 9951915          | -17.322                       | 27.815                    |
| ALCAM          | other                   | 68163411         | -55.617                       | 3.772                     |
| ANXA1          | enzyme                  | 4502101          | -9386.69                      | 3.622                     |
| ANXA2          | other                   | 50845388         | -71.797                       | 2.596                     |
| ANXA5          | transporter             | 4502107          | -1.2E+12                      | 5.635                     |
| ARHGDI A       | other                   | 2.97E+08         | -16.709                       | 3.853                     |
| CALB2          | other                   | 1.54E+08         | -10.284                       | -2.2E+12                  |
| CD44           | other                   | 5.3E+08          | -4.995                        | 7.45                      |
| CLU            | other                   | 5.79E+08         | -9.689                        | -5.614                    |
| CTNNA1         | other                   | 55770844         | 2.98                          | 2.236                     |
| ECM1           | transporter             | 3.22E+08         | -11.77                        | -5.613                    |
| ENO1           | enzyme                  | 4503571          | -7.169                        | 2.233                     |
| FBLN1          | other                   | 34734066         | 3.04                          | -8.892                    |
| FLNB           | other                   | 1.06E+08         | -8.963                        | 2.324                     |
| FSCN1          | other                   | 4507115          | -11.304                       | 6.241                     |
| GDF15          | growth factor           | 1.54E+08         | -4.605                        | -2.784                    |
| GPI            | enzyme                  | 5.77E+08         | -11.18                        | 3.552                     |
| GSN            | other                   | 1.89E+08         | -4.547                        | -3.993                    |
| GSTO1          | enzyme                  | 4758484          | -10.824                       | 2.908                     |
| GSTP1          | enzyme                  | 4504183          | -8.439                        | 3.129                     |
| HLA-B          | transmembrane receptor  | 17986001         | 2.11                          | -2.9E+15                  |
| HMGB1          | transcription regulator | 4504425          | -24.726                       | 2.36                      |
| HSP90A A1      | enzyme                  | 1.54E+08         | -19.208                       | 4.99                      |
| HSPA4          | other                   | 38327039         | -8.798                        | 18.08                     |
| HSPA5          | enzyme                  | 16507237         | -6.125                        | 3.71                      |
| HSPA1A /HSPA1B | enzyme                  | 1.94E+08         | -4.802                        | 2.11                      |
| HSPB1          | other                   | 4504517          | -20.221                       | -2.603                    |
| IGFBP2         | other                   | 55925576         | 2.47                          | -3.097                    |
| INHBA          | growth factor           | 4504699          | -1.8E+13                      | 4.549                     |

|               |                        |          |          |          |
|---------------|------------------------|----------|----------|----------|
| ITGB1         | transmembrane receptor | 19743819 | -237.079 | 3.966    |
| ITGB4         | transmembrane receptor | 5.79E+08 | -2.9E+12 | 9.36     |
| KLK6          | peptidase              | 4506155  | 2.61     | 2.694    |
| KRT1          | other                  | 1.19E+08 | 2.45     | 32.236   |
| KRT9          | other                  | 55956899 | 3.18     | 17.492   |
| KRT18         | other                  | 4557888  | -43.912  | -2.28    |
| LDHA          | enzyme                 | 2.6E+08  | -15.195  | 5.124    |
| LDHB          | enzyme                 | 4557032  | -4.146   | 2.045    |
| NAMPT         | cytokine               | 5031977  | -2636.3  | 3.798    |
| OSMR          | transmembrane receptor | 5.3E+08  | -1724.25 | 31.917   |
| PARP1         | enzyme                 | 1.57E+08 | -10.349  | 2.505    |
| PCSK9         | peptidase              | 31317307 | 15.35    | -3.51    |
| PFN1          | other                  | 4826898  | -5.166   | 2.537    |
| PKM           | kinase                 | 5.79E+08 | -8.758   | 2.141    |
| PLAT          | peptidase              | 4505861  | -177.778 | 2.715    |
| PPL           | other                  | 5.79E+08 | -13.587  | -2.4E+13 |
| PRDX1         | enzyme                 | 32455266 | -11.116  | 8.044    |
| PRDX6         | enzyme                 | 4758638  | -6.991   | 2.027    |
| PSAP          | enzyme                 | 1.1E+08  | -96.599  | 3.182    |
| RPS3          | enzyme                 | 15718687 | -29.903  | 2.669    |
| SERPINA1      | other                  | 50363217 | 34.11    | 3.15     |
| SERPINB5      | other                  | 1.68E+08 | 288976.7 | 6.195    |
| STMN1         | other                  | 2.24E+08 | -9.733   | 14.147   |
| TFRC          | transporter            | 1.89E+08 | -4.208   | 15.104   |
| TGFB1         | growth factor          | 63025222 | 4.05     | 2.452    |
| TMSB10/TMSB4X | other                  | 11056061 | -6.713   | 2.044    |
| TUBB4B        | other                  | 5174735  | -12.048  | 2.889    |
| XRCC6         | enzyme                 | 4503841  | -10.966  | 6.264    |
